# Supplementary material for: Inferring genes that escape X-Chromosome inactivation reveals important contribution of variable escape genes to sex-biased diseases
Source: HighWire-hosted journal article supplement (doi:10.1101/gr.275677.121), 2021-08-23
Supplement: Supplemental_Table_S1.xlsx [file Supplemental_Table_S1.xlsx]

## Sheet: Supplemental_Table_S1
sample	combination	mu	sigma2	targetmodel	alpha	beta	m	theta	aescape	bescape	perr	pierr	pinac	piescape
sample1	comb1	0.15	4e-08	M0	478125	2.70937e+06	0.15	3187499	3.125e+06	3.125e+06	0	0	1	0.5
sample2	comb1	0.15	4e-08	M0	478125	2.70937e+06	0.15	3187499	3.125e+06	3.125e+06	0	0	1	0.5
sample3	comb1	0.15	4e-08	M0	478125	2.70937e+06	0.15	3187499	3.125e+06	3.125e+06	0	0	1	0.5
sample4	comb1	0.15	4e-08	M0	478125	2.70937e+06	0.15	3187499	3.125e+06	3.125e+06	0	0	1	0.5
sample5	comb1	0.15	4e-08	M0	478125	2.70937e+06	0.15	3187499	3.125e+06	3.125e+06	0	0	1	0.5
sample6	comb1	0.15	4e-08	M0	478125	2.70937e+06	0.15	3187499	3.125e+06	3.125e+06	0	0	1	0.5
sample7	comb1	0.15	4e-08	M0	478125	2.70937e+06	0.15	3187499	3.125e+06	3.125e+06	0	0	1	0.5
sample8	comb1	0.15	4e-08	M0	478125	2.70937e+06	0.15	3187499	3.125e+06	3.125e+06	0	0	1	0.5
sample9	comb1	0.15	4e-08	M0	478125	2.70937e+06	0.15	3187499	3.125e+06	3.125e+06	0	0	1	0.5
sample10	comb1	0.15	4e-08	M0	478125	2.70937e+06	0.15	3187499	3.125e+06	3.125e+06	0	0	1	0.5
sample11	comb1	0.15	4e-08	M0	478125	2.70937e+06	0.15	3187499	3.125e+06	3.125e+06	0	0	1	0.5
sample12	comb1	0.15	4e-08	M0	478125	2.70937e+06	0.15	3187499	3.125e+06	3.125e+06	0	0	1	0.5
sample13	comb1	0.15	4e-08	M0	478125	2.70937e+06	0.15	3187499	3.125e+06	3.125e+06	0	0	1	0.5
sample14	comb1	0.15	4e-08	M0	478125	2.70937e+06	0.15	3187499	3.125e+06	3.125e+06	0	0	1	0.5
sample15	comb1	0.15	4e-08	M0	478125	2.70937e+06	0.15	3187499	3.125e+06	3.125e+06	0	0	1	0.5
sample16	comb1	0.15	4e-08	M0	478125	2.70937e+06	0.15	3187499	3.125e+06	3.125e+06	0	0	1	0.5
sample17	comb1	0.15	4e-08	M0	478125	2.70937e+06	0.15	3187499	3.125e+06	3.125e+06	0	0	1	0.5
sample18	comb1	0.15	4e-08	M0	478125	2.70937e+06	0.15	3187499	3.125e+06	3.125e+06	0	0	1	0.5
sample19	comb1	0.15	4e-08	M0	478125	2.70937e+06	0.15	3187499	3.125e+06	3.125e+06	0	0	1	0.5
sample20	comb1	0.15	4e-08	M0	478125	2.70937e+06	0.15	3187499	3.125e+06	3.125e+06	0	0	1	0.5
sample21	comb1	0.15	4e-08	M1	478125	2.70937e+06	0.15	3187499	3.125e+06	3.125e+06	0.1	0.01	1	0.5
sample22	comb1	0.15	4e-08	M1	478125	2.70937e+06	0.15	3187499	3.125e+06	3.125e+06	0.1	0.01	1	0.5
sample23	comb1	0.15	4e-08	M1	478125	2.70937e+06	0.15	3187499	3.125e+06	3.125e+06	0.1	0.01	1	0.5
sample24	comb1	0.15	4e-08	M1	478125	2.70937e+06	0.15	3187499	3.125e+06	3.125e+06	0.1	0.01	1	0.5
sample25	comb1	0.15	4e-08	M1	478125	2.70937e+06	0.15	3187499	3.125e+06	3.125e+06	0.1	0.01	1	0.5
sample26	comb1	0.15	4e-08	M1	478125	2.70937e+06	0.15	3187499	3.125e+06	3.125e+06	0.1	0.01	1	0.5
sample27	comb1	0.15	4e-08	M1	478125	2.70937e+06	0.15	3187499	3.125e+06	3.125e+06	0.1	0.01	1	0.5
sample28	comb1	0.15	4e-08	M1	478125	2.70937e+06	0.15	3187499	3.125e+06	3.125e+06	0.1	0.01	1	0.5
sample29	comb1	0.15	4e-08	M1	478125	2.70937e+06	0.15	3187499	3.125e+06	3.125e+06	0.1	0.01	1	0.5
sample30	comb1	0.15	4e-08	M1	478125	2.70937e+06	0.15	3187499	3.125e+06	3.125e+06	0.1	0.01	1	0.5
sample31	comb1	0.15	4e-08	M1	478125	2.70937e+06	0.15	3187499	3.125e+06	3.125e+06	0.1	0.01	1	0.5
sample32	comb1	0.15	4e-08	M1	478125	2.70937e+06	0.15	3187499	3.125e+06	3.125e+06	0.1	0.01	1	0.5
sample33	comb1	0.15	4e-08	M1	478125	2.70937e+06	0.15	3187499	3.125e+06	3.125e+06	0.1	0.01	1	0.5
sample34	comb1	0.15	4e-08	M1	478125	2.70937e+06	0.15	3187499	3.125e+06	3.125e+06	0.1	0.01	1	0.5
sample35	comb1	0.15	4e-08	M1	478125	2.70937e+06	0.15	3187499	3.125e+06	3.125e+06	0.1	0.01	1	0.5
sample36	comb1	0.15	4e-08	M1	478125	2.70937e+06	0.15	3187499	3.125e+06	3.125e+06	0.1	0.01	1	0.5
sample37	comb1	0.15	4e-08	M1	478125	2.70937e+06	0.15	3187499	3.125e+06	3.125e+06	0.1	0.01	1	0.5
sample38	comb1	0.15	4e-08	M1	478125	2.70937e+06	0.15	3187499	3.125e+06	3.125e+06	0.1	0.01	1	0.5
sample39	comb1	0.15	4e-08	M1	478125	2.70937e+06	0.15	3187499	3.125e+06	3.125e+06	0.1	0.01	1	0.5
sample40	comb1	0.15	4e-08	M1	478125	2.70937e+06	0.15	3187499	3.125e+06	3.125e+06	0.1	0.01	1	0.5
sample41	comb1	0.15	4e-08	M2	478125	2.70937e+06	0.15	3187499	3.125e+06	3.125e+06	0	0	0.85	0.5
sample42	comb1	0.15	4e-08	M2	478125	2.70937e+06	0.15	3187499	3.125e+06	3.125e+06	0	0	0.85	0.5
sample43	comb1	0.15	4e-08	M2	478125	2.70937e+06	0.15	3187499	3.125e+06	3.125e+06	0	0	0.85	0.5
sample44	comb1	0.15	4e-08	M2	478125	2.70937e+06	0.15	3187499	3.125e+06	3.125e+06	0	0	0.85	0.5
sample45	comb1	0.15	4e-08	M2	478125	2.70937e+06	0.15	3187499	3.125e+06	3.125e+06	0	0	0.85	0.5
sample46	comb1	0.15	4e-08	M2	478125	2.70937e+06	0.15	3187499	3.125e+06	3.125e+06	0	0	0.85	0.5
sample47	comb1	0.15	4e-08	M2	478125	2.70937e+06	0.15	3187499	3.125e+06	3.125e+06	0	0	0.85	0.5
sample48	comb1	0.15	4e-08	M2	478125	2.70937e+06	0.15	3187499	3.125e+06	3.125e+06	0	0	0.85	0.5
sample49	comb1	0.15	4e-08	M2	478125	2.70937e+06	0.15	3187499	3.125e+06	3.125e+06	0	0	0.85	0.5
sample50	comb1	0.15	4e-08	M2	478125	2.70937e+06	0.15	3187499	3.125e+06	3.125e+06	0	0	0.85	0.5
sample51	comb1	0.15	4e-08	M2	478125	2.70937e+06	0.15	3187499	3.125e+06	3.125e+06	0	0	0.85	0.5
sample52	comb1	0.15	4e-08	M2	478125	2.70937e+06	0.15	3187499	3.125e+06	3.125e+06	0	0	0.85	0.5
sample53	comb1	0.15	4e-08	M2	478125	2.70937e+06	0.15	3187499	3.125e+06	3.125e+06	0	0	0.85	0.5
sample54	comb1	0.15	4e-08	M2	478125	2.70937e+06	0.15	3187499	3.125e+06	3.125e+06	0	0	0.85	0.5
sample55	comb1	0.15	4e-08	M2	478125	2.70937e+06	0.15	3187499	3.125e+06	3.125e+06	0	0	0.85	0.5
sample56	comb1	0.15	4e-08	M2	478125	2.70937e+06	0.15	3187499	3.125e+06	3.125e+06	0	0	0.85	0.5
sample57	comb1	0.15	4e-08	M2	478125	2.70937e+06	0.15	3187499	3.125e+06	3.125e+06	0	0	0.85	0.5
sample58	comb1	0.15	4e-08	M2	478125	2.70937e+06	0.15	3187499	3.125e+06	3.125e+06	0	0	0.85	0.5
sample59	comb1	0.15	4e-08	M2	478125	2.70937e+06	0.15	3187499	3.125e+06	3.125e+06	0	0	0.85	0.5
sample60	comb1	0.15	4e-08	M2	478125	2.70937e+06	0.15	3187499	3.125e+06	3.125e+06	0	0	0.85	0.5
sample1	comb2	0.15	0.0002	M0	95.475	541.025	0.148897	636.5	624.5	624.5	0	0	1	0.5
sample2	comb2	0.15	0.0002	M0	95.475	541.025	0.148897	636.5	624.5	624.5	0	0	1	0.5
sample3	comb2	0.15	0.0002	M0	95.475	541.025	0.148897	636.5	624.5	624.5	0	0	1	0.5
sample4	comb2	0.15	0.0002	M0	95.475	541.025	0.148897	636.5	624.5	624.5	0	0	1	0.5
sample5	comb2	0.15	0.0002	M0	95.475	541.025	0.148897	636.5	624.5	624.5	0	0	1	0.5
sample6	comb2	0.15	0.0002	M0	95.475	541.025	0.148897	636.5	624.5	624.5	0	0	1	0.5
sample7	comb2	0.15	0.0002	M0	95.475	541.025	0.148897	636.5	624.5	624.5	0	0	1	0.5
sample8	comb2	0.15	0.0002	M0	95.475	541.025	0.148897	636.5	624.5	624.5	0	0	1	0.5
sample9	comb2	0.15	0.0002	M0	95.475	541.025	0.148897	636.5	624.5	624.5	0	0	1	0.5
sample10	comb2	0.15	0.0002	M0	95.475	541.025	0.148897	636.5	624.5	624.5	0	0	1	0.5
sample11	comb2	0.15	0.0002	M0	95.475	541.025	0.148897	636.5	624.5	624.5	0	0	1	0.5
sample12	comb2	0.15	0.0002	M0	95.475	541.025	0.148897	636.5	624.5	624.5	0	0	1	0.5
sample13	comb2	0.15	0.0002	M0	95.475	541.025	0.148897	636.5	624.5	624.5	0	0	1	0.5
sample14	comb2	0.15	0.0002	M0	95.475	541.025	0.148897	636.5	624.5	624.5	0	0	1	0.5
sample15	comb2	0.15	0.0002	M0	95.475	541.025	0.148897	636.5	624.5	624.5	0	0	1	0.5
sample16	comb2	0.15	0.0002	M0	95.475	541.025	0.148897	636.5	624.5	624.5	0	0	1	0.5
sample17	comb2	0.15	0.0002	M0	95.475	541.025	0.148897	636.5	624.5	624.5	0	0	1	0.5
sample18	comb2	0.15	0.0002	M0	95.475	541.025	0.148897	636.5	624.5	624.5	0	0	1	0.5
sample19	comb2	0.15	0.0002	M0	95.475	541.025	0.148897	636.5	624.5	624.5	0	0	1	0.5
sample20	comb2	0.15	0.0002	M0	95.475	541.025	0.148897	636.5	624.5	624.5	0	0	1	0.5
sample21	comb2	0.15	0.0002	M1	95.475	541.025	0.148897	636.5	624.5	624.5	0.1	0.01	1	0.5
sample22	comb2	0.15	0.0002	M1	95.475	541.025	0.148897	636.5	624.5	624.5	0.1	0.01	1	0.5
sample23	comb2	0.15	0.0002	M1	95.475	541.025	0.148897	636.5	624.5	624.5	0.1	0.01	1	0.5
sample24	comb2	0.15	0.0002	M1	95.475	541.025	0.148897	636.5	624.5	624.5	0.1	0.01	1	0.5
sample25	comb2	0.15	0.0002	M1	95.475	541.025	0.148897	636.5	624.5	624.5	0.1	0.01	1	0.5
sample26	comb2	0.15	0.0002	M1	95.475	541.025	0.148897	636.5	624.5	624.5	0.1	0.01	1	0.5
sample27	comb2	0.15	0.0002	M1	95.475	541.025	0.148897	636.5	624.5	624.5	0.1	0.01	1	0.5
sample28	comb2	0.15	0.0002	M1	95.475	541.025	0.148897	636.5	624.5	624.5	0.1	0.01	1	0.5
sample29	comb2	0.15	0.0002	M1	95.475	541.025	0.148897	636.5	624.5	624.5	0.1	0.01	1	0.5
sample30	comb2	0.15	0.0002	M1	95.475	541.025	0.148897	636.5	624.5	624.5	0.1	0.01	1	0.5
sample31	comb2	0.15	0.0002	M1	95.475	541.025	0.148897	636.5	624.5	624.5	0.1	0.01	1	0.5
sample32	comb2	0.15	0.0002	M1	95.475	541.025	0.148897	636.5	624.5	624.5	0.1	0.01	1	0.5
sample33	comb2	0.15	0.0002	M1	95.475	541.025	0.148897	636.5	624.5	624.5	0.1	0.01	1	0.5
sample34	comb2	0.15	0.0002	M1	95.475	541.025	0.148897	636.5	624.5	624.5	0.1	0.01	1	0.5
sample35	comb2	0.15	0.0002	M1	95.475	541.025	0.148897	636.5	624.5	624.5	0.1	0.01	1	0.5
sample36	comb2	0.15	0.0002	M1	95.475	541.025	0.148897	636.5	624.5	624.5	0.1	0.01	1	0.5
sample37	comb2	0.15	0.0002	M1	95.475	541.025	0.148897	636.5	624.5	624.5	0.1	0.01	1	0.5
sample38	comb2	0.15	0.0002	M1	95.475	541.025	0.148897	636.5	624.5	624.5	0.1	0.01	1	0.5
sample39	comb2	0.15	0.0002	M1	95.475	541.025	0.148897	636.5	624.5	624.5	0.1	0.01	1	0.5
sample40	comb2	0.15	0.0002	M1	95.475	541.025	0.148897	636.5	624.5	624.5	0.1	0.01	1	0.5
sample41	comb2	0.15	0.0002	M2	95.475	541.025	0.148897	636.5	624.5	624.5	0	0	0.85	0.5
sample42	comb2	0.15	0.0002	M2	95.475	541.025	0.148897	636.5	624.5	624.5	0	0	0.85	0.5
sample43	comb2	0.15	0.0002	M2	95.475	541.025	0.148897	636.5	624.5	624.5	0	0	0.85	0.5
sample44	comb2	0.15	0.0002	M2	95.475	541.025	0.148897	636.5	624.5	624.5	0	0	0.85	0.5
sample45	comb2	0.15	0.0002	M2	95.475	541.025	0.148897	636.5	624.5	624.5	0	0	0.85	0.5
sample46	comb2	0.15	0.0002	M2	95.475	541.025	0.148897	636.5	624.5	624.5	0	0	0.85	0.5
sample47	comb2	0.15	0.0002	M2	95.475	541.025	0.148897	636.5	624.5	624.5	0	0	0.85	0.5
sample48	comb2	0.15	0.0002	M2	95.475	541.025	0.148897	636.5	624.5	624.5	0	0	0.85	0.5
sample49	comb2	0.15	0.0002	M2	95.475	541.025	0.148897	636.5	624.5	624.5	0	0	0.85	0.5
sample50	comb2	0.15	0.0002	M2	95.475	541.025	0.148897	636.5	624.5	624.5	0	0	0.85	0.5
sample51	comb2	0.15	0.0002	M2	95.475	541.025	0.148897	636.5	624.5	624.5	0	0	0.85	0.5
sample52	comb2	0.15	0.0002	M2	95.475	541.025	0.148897	636.5	624.5	624.5	0	0	0.85	0.5
sample53	comb2	0.15	0.0002	M2	95.475	541.025	0.148897	636.5	624.5	624.5	0	0	0.85	0.5
sample54	comb2	0.15	0.0002	M2	95.475	541.025	0.148897	636.5	624.5	624.5	0	0	0.85	0.5
sample55	comb2	0.15	0.0002	M2	95.475	541.025	0.148897	636.5	624.5	624.5	0	0	0.85	0.5
sample56	comb2	0.15	0.0002	M2	95.475	541.025	0.148897	636.5	624.5	624.5	0	0	0.85	0.5
sample57	comb2	0.15	0.0002	M2	95.475	541.025	0.148897	636.5	624.5	624.5	0	0	0.85	0.5
sample58	comb2	0.15	0.0002	M2	95.475	541.025	0.148897	636.5	624.5	624.5	0	0	0.85	0.5
sample59	comb2	0.15	0.0002	M2	95.475	541.025	0.148897	636.5	624.5	624.5	0	0	0.85	0.5
sample60	comb2	0.15	0.0002	M2	95.475	541.025	0.148897	636.5	624.5	624.5	0	0	0.85	0.5
sample1	comb3	0.15	0.001	M0	18.975	107.525	0.144378	126.5	124.5	124.5	0	0	1	0.5
sample2	comb3	0.15	0.001	M0	18.975	107.525	0.144378	126.5	124.5	124.5	0	0	1	0.5
sample3	comb3	0.15	0.001	M0	18.975	107.525	0.144378	126.5	124.5	124.5	0	0	1	0.5
sample4	comb3	0.15	0.001	M0	18.975	107.525	0.144378	126.5	124.5	124.5	0	0	1	0.5
sample5	comb3	0.15	0.001	M0	18.975	107.525	0.144378	126.5	124.5	124.5	0	0	1	0.5
sample6	comb3	0.15	0.001	M0	18.975	107.525	0.144378	126.5	124.5	124.5	0	0	1	0.5
sample7	comb3	0.15	0.001	M0	18.975	107.525	0.144378	126.5	124.5	124.5	0	0	1	0.5
sample8	comb3	0.15	0.001	M0	18.975	107.525	0.144378	126.5	124.5	124.5	0	0	1	0.5
sample9	comb3	0.15	0.001	M0	18.975	107.525	0.144378	126.5	124.5	124.5	0	0	1	0.5
sample10	comb3	0.15	0.001	M0	18.975	107.525	0.144378	126.5	124.5	124.5	0	0	1	0.5
sample11	comb3	0.15	0.001	M0	18.975	107.525	0.144378	126.5	124.5	124.5	0	0	1	0.5
sample12	comb3	0.15	0.001	M0	18.975	107.525	0.144378	126.5	124.5	124.5	0	0	1	0.5
sample13	comb3	0.15	0.001	M0	18.975	107.525	0.144378	126.5	124.5	124.5	0	0	1	0.5
sample14	comb3	0.15	0.001	M0	18.975	107.525	0.144378	126.5	124.5	124.5	0	0	1	0.5
sample15	comb3	0.15	0.001	M0	18.975	107.525	0.144378	126.5	124.5	124.5	0	0	1	0.5
sample16	comb3	0.15	0.001	M0	18.975	107.525	0.144378	126.5	124.5	124.5	0	0	1	0.5
sample17	comb3	0.15	0.001	M0	18.975	107.525	0.144378	126.5	124.5	124.5	0	0	1	0.5
sample18	comb3	0.15	0.001	M0	18.975	107.525	0.144378	126.5	124.5	124.5	0	0	1	0.5
sample19	comb3	0.15	0.001	M0	18.975	107.525	0.144378	126.5	124.5	124.5	0	0	1	0.5
sample20	comb3	0.15	0.001	M0	18.975	107.525	0.144378	126.5	124.5	124.5	0	0	1	0.5
sample21	comb3	0.15	0.001	M1	18.975	107.525	0.144378	126.5	124.5	124.5	0.1	0.01	1	0.5
sample22	comb3	0.15	0.001	M1	18.975	107.525	0.144378	126.5	124.5	124.5	0.1	0.01	1	0.5
sample23	comb3	0.15	0.001	M1	18.975	107.525	0.144378	126.5	124.5	124.5	0.1	0.01	1	0.5
sample24	comb3	0.15	0.001	M1	18.975	107.525	0.144378	126.5	124.5	124.5	0.1	0.01	1	0.5
sample25	comb3	0.15	0.001	M1	18.975	107.525	0.144378	126.5	124.5	124.5	0.1	0.01	1	0.5
sample26	comb3	0.15	0.001	M1	18.975	107.525	0.144378	126.5	124.5	124.5	0.1	0.01	1	0.5
sample27	comb3	0.15	0.001	M1	18.975	107.525	0.144378	126.5	124.5	124.5	0.1	0.01	1	0.5
sample28	comb3	0.15	0.001	M1	18.975	107.525	0.144378	126.5	124.5	124.5	0.1	0.01	1	0.5
sample29	comb3	0.15	0.001	M1	18.975	107.525	0.144378	126.5	124.5	124.5	0.1	0.01	1	0.5
sample30	comb3	0.15	0.001	M1	18.975	107.525	0.144378	126.5	124.5	124.5	0.1	0.01	1	0.5
sample31	comb3	0.15	0.001	M1	18.975	107.525	0.144378	126.5	124.5	124.5	0.1	0.01	1	0.5
sample32	comb3	0.15	0.001	M1	18.975	107.525	0.144378	126.5	124.5	124.5	0.1	0.01	1	0.5
sample33	comb3	0.15	0.001	M1	18.975	107.525	0.144378	126.5	124.5	124.5	0.1	0.01	1	0.5
sample34	comb3	0.15	0.001	M1	18.975	107.525	0.144378	126.5	124.5	124.5	0.1	0.01	1	0.5
sample35	comb3	0.15	0.001	M1	18.975	107.525	0.144378	126.5	124.5	124.5	0.1	0.01	1	0.5
sample36	comb3	0.15	0.001	M1	18.975	107.525	0.144378	126.5	124.5	124.5	0.1	0.01	1	0.5
sample37	comb3	0.15	0.001	M1	18.975	107.525	0.144378	126.5	124.5	124.5	0.1	0.01	1	0.5
sample38	comb3	0.15	0.001	M1	18.975	107.525	0.144378	126.5	124.5	124.5	0.1	0.01	1	0.5
sample39	comb3	0.15	0.001	M1	18.975	107.525	0.144378	126.5	124.5	124.5	0.1	0.01	1	0.5
sample40	comb3	0.15	0.001	M1	18.975	107.525	0.144378	126.5	124.5	124.5	0.1	0.01	1	0.5
sample41	comb3	0.15	0.001	M2	18.975	107.525	0.144378	126.5	124.5	124.5	0	0	0.85	0.5
sample42	comb3	0.15	0.001	M2	18.975	107.525	0.144378	126.5	124.5	124.5	0	0	0.85	0.5
sample43	comb3	0.15	0.001	M2	18.975	107.525	0.144378	126.5	124.5	124.5	0	0	0.85	0.5
sample44	comb3	0.15	0.001	M2	18.975	107.525	0.144378	126.5	124.5	124.5	0	0	0.85	0.5
sample45	comb3	0.15	0.001	M2	18.975	107.525	0.144378	126.5	124.5	124.5	0	0	0.85	0.5
sample46	comb3	0.15	0.001	M2	18.975	107.525	0.144378	126.5	124.5	124.5	0	0	0.85	0.5
sample47	comb3	0.15	0.001	M2	18.975	107.525	0.144378	126.5	124.5	124.5	0	0	0.85	0.5
sample48	comb3	0.15	0.001	M2	18.975	107.525	0.144378	126.5	124.5	124.5	0	0	0.85	0.5
sample49	comb3	0.15	0.001	M2	18.975	107.525	0.144378	126.5	124.5	124.5	0	0	0.85	0.5
sample50	comb3	0.15	0.001	M2	18.975	107.525	0.144378	126.5	124.5	124.5	0	0	0.85	0.5
sample51	comb3	0.15	0.001	M2	18.975	107.525	0.144378	126.5	124.5	124.5	0	0	0.85	0.5
sample52	comb3	0.15	0.001	M2	18.975	107.525	0.144378	126.5	124.5	124.5	0	0	0.85	0.5
sample53	comb3	0.15	0.001	M2	18.975	107.525	0.144378	126.5	124.5	124.5	0	0	0.85	0.5
sample54	comb3	0.15	0.001	M2	18.975	107.525	0.144378	126.5	124.5	124.5	0	0	0.85	0.5
sample55	comb3	0.15	0.001	M2	18.975	107.525	0.144378	126.5	124.5	124.5	0	0	0.85	0.5
sample56	comb3	0.15	0.001	M2	18.975	107.525	0.144378	126.5	124.5	124.5	0	0	0.85	0.5
sample57	comb3	0.15	0.001	M2	18.975	107.525	0.144378	126.5	124.5	124.5	0	0	0.85	0.5
sample58	comb3	0.15	0.001	M2	18.975	107.525	0.144378	126.5	124.5	124.5	0	0	0.85	0.5
sample59	comb3	0.15	0.001	M2	18.975	107.525	0.144378	126.5	124.5	124.5	0	0	0.85	0.5
sample60	comb3	0.15	0.001	M2	18.975	107.525	0.144378	126.5	124.5	124.5	0	0	0.85	0.5
sample1	comb4	0.25	4e-08	M0	1.17187e+06	3.51562e+06	0.25	4687499	3.125e+06	3.125e+06	0	0	1	0.5
sample2	comb4	0.25	4e-08	M0	1.17187e+06	3.51562e+06	0.25	4687499	3.125e+06	3.125e+06	0	0	1	0.5
sample3	comb4	0.25	4e-08	M0	1.17187e+06	3.51562e+06	0.25	4687499	3.125e+06	3.125e+06	0	0	1	0.5
sample4	comb4	0.25	4e-08	M0	1.17187e+06	3.51562e+06	0.25	4687499	3.125e+06	3.125e+06	0	0	1	0.5
sample5	comb4	0.25	4e-08	M0	1.17187e+06	3.51562e+06	0.25	4687499	3.125e+06	3.125e+06	0	0	1	0.5
sample6	comb4	0.25	4e-08	M0	1.17187e+06	3.51562e+06	0.25	4687499	3.125e+06	3.125e+06	0	0	1	0.5
sample7	comb4	0.25	4e-08	M0	1.17187e+06	3.51562e+06	0.25	4687499	3.125e+06	3.125e+06	0	0	1	0.5
sample8	comb4	0.25	4e-08	M0	1.17187e+06	3.51562e+06	0.25	4687499	3.125e+06	3.125e+06	0	0	1	0.5
sample9	comb4	0.25	4e-08	M0	1.17187e+06	3.51562e+06	0.25	4687499	3.125e+06	3.125e+06	0	0	1	0.5
sample10	comb4	0.25	4e-08	M0	1.17187e+06	3.51562e+06	0.25	4687499	3.125e+06	3.125e+06	0	0	1	0.5
sample11	comb4	0.25	4e-08	M0	1.17187e+06	3.51562e+06	0.25	4687499	3.125e+06	3.125e+06	0	0	1	0.5
sample12	comb4	0.25	4e-08	M0	1.17187e+06	3.51562e+06	0.25	4687499	3.125e+06	3.125e+06	0	0	1	0.5
sample13	comb4	0.25	4e-08	M0	1.17187e+06	3.51562e+06	0.25	4687499	3.125e+06	3.125e+06	0	0	1	0.5
sample14	comb4	0.25	4e-08	M0	1.17187e+06	3.51562e+06	0.25	4687499	3.125e+06	3.125e+06	0	0	1	0.5
sample15	comb4	0.25	4e-08	M0	1.17187e+06	3.51562e+06	0.25	4687499	3.125e+06	3.125e+06	0	0	1	0.5
sample16	comb4	0.25	4e-08	M0	1.17187e+06	3.51562e+06	0.25	4687499	3.125e+06	3.125e+06	0	0	1	0.5
sample17	comb4	0.25	4e-08	M0	1.17187e+06	3.51562e+06	0.25	4687499	3.125e+06	3.125e+06	0	0	1	0.5
sample18	comb4	0.25	4e-08	M0	1.17187e+06	3.51562e+06	0.25	4687499	3.125e+06	3.125e+06	0	0	1	0.5
sample19	comb4	0.25	4e-08	M0	1.17187e+06	3.51562e+06	0.25	4687499	3.125e+06	3.125e+06	0	0	1	0.5
sample20	comb4	0.25	4e-08	M0	1.17187e+06	3.51562e+06	0.25	4687499	3.125e+06	3.125e+06	0	0	1	0.5
sample21	comb4	0.25	4e-08	M1	1.17187e+06	3.51562e+06	0.25	4687499	3.125e+06	3.125e+06	0.1	0.01	1	0.5
sample22	comb4	0.25	4e-08	M1	1.17187e+06	3.51562e+06	0.25	4687499	3.125e+06	3.125e+06	0.1	0.01	1	0.5
sample23	comb4	0.25	4e-08	M1	1.17187e+06	3.51562e+06	0.25	4687499	3.125e+06	3.125e+06	0.1	0.01	1	0.5
sample24	comb4	0.25	4e-08	M1	1.17187e+06	3.51562e+06	0.25	4687499	3.125e+06	3.125e+06	0.1	0.01	1	0.5
sample25	comb4	0.25	4e-08	M1	1.17187e+06	3.51562e+06	0.25	4687499	3.125e+06	3.125e+06	0.1	0.01	1	0.5
sample26	comb4	0.25	4e-08	M1	1.17187e+06	3.51562e+06	0.25	4687499	3.125e+06	3.125e+06	0.1	0.01	1	0.5
sample27	comb4	0.25	4e-08	M1	1.17187e+06	3.51562e+06	0.25	4687499	3.125e+06	3.125e+06	0.1	0.01	1	0.5
sample28	comb4	0.25	4e-08	M1	1.17187e+06	3.51562e+06	0.25	4687499	3.125e+06	3.125e+06	0.1	0.01	1	0.5
sample29	comb4	0.25	4e-08	M1	1.17187e+06	3.51562e+06	0.25	4687499	3.125e+06	3.125e+06	0.1	0.01	1	0.5
sample30	comb4	0.25	4e-08	M1	1.17187e+06	3.51562e+06	0.25	4687499	3.125e+06	3.125e+06	0.1	0.01	1	0.5
sample31	comb4	0.25	4e-08	M1	1.17187e+06	3.51562e+06	0.25	4687499	3.125e+06	3.125e+06	0.1	0.01	1	0.5
sample32	comb4	0.25	4e-08	M1	1.17187e+06	3.51562e+06	0.25	4687499	3.125e+06	3.125e+06	0.1	0.01	1	0.5
sample33	comb4	0.25	4e-08	M1	1.17187e+06	3.51562e+06	0.25	4687499	3.125e+06	3.125e+06	0.1	0.01	1	0.5
sample34	comb4	0.25	4e-08	M1	1.17187e+06	3.51562e+06	0.25	4687499	3.125e+06	3.125e+06	0.1	0.01	1	0.5
sample35	comb4	0.25	4e-08	M1	1.17187e+06	3.51562e+06	0.25	4687499	3.125e+06	3.125e+06	0.1	0.01	1	0.5
sample36	comb4	0.25	4e-08	M1	1.17187e+06	3.51562e+06	0.25	4687499	3.125e+06	3.125e+06	0.1	0.01	1	0.5
sample37	comb4	0.25	4e-08	M1	1.17187e+06	3.51562e+06	0.25	4687499	3.125e+06	3.125e+06	0.1	0.01	1	0.5
sample38	comb4	0.25	4e-08	M1	1.17187e+06	3.51562e+06	0.25	4687499	3.125e+06	3.125e+06	0.1	0.01	1	0.5
sample39	comb4	0.25	4e-08	M1	1.17187e+06	3.51562e+06	0.25	4687499	3.125e+06	3.125e+06	0.1	0.01	1	0.5
sample40	comb4	0.25	4e-08	M1	1.17187e+06	3.51562e+06	0.25	4687499	3.125e+06	3.125e+06	0.1	0.01	1	0.5
sample41	comb4	0.25	4e-08	M2	1.17187e+06	3.51562e+06	0.25	4687499	3.125e+06	3.125e+06	0	0	0.85	0.5
sample42	comb4	0.25	4e-08	M2	1.17187e+06	3.51562e+06	0.25	4687499	3.125e+06	3.125e+06	0	0	0.85	0.5
sample43	comb4	0.25	4e-08	M2	1.17187e+06	3.51562e+06	0.25	4687499	3.125e+06	3.125e+06	0	0	0.85	0.5
sample44	comb4	0.25	4e-08	M2	1.17187e+06	3.51562e+06	0.25	4687499	3.125e+06	3.125e+06	0	0	0.85	0.5
sample45	comb4	0.25	4e-08	M2	1.17187e+06	3.51562e+06	0.25	4687499	3.125e+06	3.125e+06	0	0	0.85	0.5
sample46	comb4	0.25	4e-08	M2	1.17187e+06	3.51562e+06	0.25	4687499	3.125e+06	3.125e+06	0	0	0.85	0.5
sample47	comb4	0.25	4e-08	M2	1.17187e+06	3.51562e+06	0.25	4687499	3.125e+06	3.125e+06	0	0	0.85	0.5
sample48	comb4	0.25	4e-08	M2	1.17187e+06	3.51562e+06	0.25	4687499	3.125e+06	3.125e+06	0	0	0.85	0.5
sample49	comb4	0.25	4e-08	M2	1.17187e+06	3.51562e+06	0.25	4687499	3.125e+06	3.125e+06	0	0	0.85	0.5
sample50	comb4	0.25	4e-08	M2	1.17187e+06	3.51562e+06	0.25	4687499	3.125e+06	3.125e+06	0	0	0.85	0.5
sample51	comb4	0.25	4e-08	M2	1.17187e+06	3.51562e+06	0.25	4687499	3.125e+06	3.125e+06	0	0	0.85	0.5
sample52	comb4	0.25	4e-08	M2	1.17187e+06	3.51562e+06	0.25	4687499	3.125e+06	3.125e+06	0	0	0.85	0.5
sample53	comb4	0.25	4e-08	M2	1.17187e+06	3.51562e+06	0.25	4687499	3.125e+06	3.125e+06	0	0	0.85	0.5
sample54	comb4	0.25	4e-08	M2	1.17187e+06	3.51562e+06	0.25	4687499	3.125e+06	3.125e+06	0	0	0.85	0.5
sample55	comb4	0.25	4e-08	M2	1.17187e+06	3.51562e+06	0.25	4687499	3.125e+06	3.125e+06	0	0	0.85	0.5
sample56	comb4	0.25	4e-08	M2	1.17187e+06	3.51562e+06	0.25	4687499	3.125e+06	3.125e+06	0	0	0.85	0.5
sample57	comb4	0.25	4e-08	M2	1.17187e+06	3.51562e+06	0.25	4687499	3.125e+06	3.125e+06	0	0	0.85	0.5
sample58	comb4	0.25	4e-08	M2	1.17187e+06	3.51562e+06	0.25	4687499	3.125e+06	3.125e+06	0	0	0.85	0.5
sample59	comb4	0.25	4e-08	M2	1.17187e+06	3.51562e+06	0.25	4687499	3.125e+06	3.125e+06	0	0	0.85	0.5
sample60	comb4	0.25	4e-08	M2	1.17187e+06	3.51562e+06	0.25	4687499	3.125e+06	3.125e+06	0	0	0.85	0.5
sample1	comb5	0.25	0.0002	M0	234.125	702.375	0.249465	936.5	624.5	624.5	0	0	1	0.5
sample2	comb5	0.25	0.0002	M0	234.125	702.375	0.249465	936.5	624.5	624.5	0	0	1	0.5
sample3	comb5	0.25	0.0002	M0	234.125	702.375	0.249465	936.5	624.5	624.5	0	0	1	0.5
sample4	comb5	0.25	0.0002	M0	234.125	702.375	0.249465	936.5	624.5	624.5	0	0	1	0.5
sample5	comb5	0.25	0.0002	M0	234.125	702.375	0.249465	936.5	624.5	624.5	0	0	1	0.5
sample6	comb5	0.25	0.0002	M0	234.125	702.375	0.249465	936.5	624.5	624.5	0	0	1	0.5
sample7	comb5	0.25	0.0002	M0	234.125	702.375	0.249465	936.5	624.5	624.5	0	0	1	0.5
sample8	comb5	0.25	0.0002	M0	234.125	702.375	0.249465	936.5	624.5	624.5	0	0	1	0.5
sample9	comb5	0.25	0.0002	M0	234.125	702.375	0.249465	936.5	624.5	624.5	0	0	1	0.5
sample10	comb5	0.25	0.0002	M0	234.125	702.375	0.249465	936.5	624.5	624.5	0	0	1	0.5
sample11	comb5	0.25	0.0002	M0	234.125	702.375	0.249465	936.5	624.5	624.5	0	0	1	0.5
sample12	comb5	0.25	0.0002	M0	234.125	702.375	0.249465	936.5	624.5	624.5	0	0	1	0.5
sample13	comb5	0.25	0.0002	M0	234.125	702.375	0.249465	936.5	624.5	624.5	0	0	1	0.5
sample14	comb5	0.25	0.0002	M0	234.125	702.375	0.249465	936.5	624.5	624.5	0	0	1	0.5
sample15	comb5	0.25	0.0002	M0	234.125	702.375	0.249465	936.5	624.5	624.5	0	0	1	0.5
sample16	comb5	0.25	0.0002	M0	234.125	702.375	0.249465	936.5	624.5	624.5	0	0	1	0.5
sample17	comb5	0.25	0.0002	M0	234.125	702.375	0.249465	936.5	624.5	624.5	0	0	1	0.5
sample18	comb5	0.25	0.0002	M0	234.125	702.375	0.249465	936.5	624.5	624.5	0	0	1	0.5
sample19	comb5	0.25	0.0002	M0	234.125	702.375	0.249465	936.5	624.5	624.5	0	0	1	0.5
sample20	comb5	0.25	0.0002	M0	234.125	702.375	0.249465	936.5	624.5	624.5	0	0	1	0.5
sample21	comb5	0.25	0.0002	M1	234.125	702.375	0.249465	936.5	624.5	624.5	0.1	0.01	1	0.5
sample22	comb5	0.25	0.0002	M1	234.125	702.375	0.249465	936.5	624.5	624.5	0.1	0.01	1	0.5
sample23	comb5	0.25	0.0002	M1	234.125	702.375	0.249465	936.5	624.5	624.5	0.1	0.01	1	0.5
sample24	comb5	0.25	0.0002	M1	234.125	702.375	0.249465	936.5	624.5	624.5	0.1	0.01	1	0.5
sample25	comb5	0.25	0.0002	M1	234.125	702.375	0.249465	936.5	624.5	624.5	0.1	0.01	1	0.5
sample26	comb5	0.25	0.0002	M1	234.125	702.375	0.249465	936.5	624.5	624.5	0.1	0.01	1	0.5
sample27	comb5	0.25	0.0002	M1	234.125	702.375	0.249465	936.5	624.5	624.5	0.1	0.01	1	0.5
sample28	comb5	0.25	0.0002	M1	234.125	702.375	0.249465	936.5	624.5	624.5	0.1	0.01	1	0.5
sample29	comb5	0.25	0.0002	M1	234.125	702.375	0.249465	936.5	624.5	624.5	0.1	0.01	1	0.5
sample30	comb5	0.25	0.0002	M1	234.125	702.375	0.249465	936.5	624.5	624.5	0.1	0.01	1	0.5
sample31	comb5	0.25	0.0002	M1	234.125	702.375	0.249465	936.5	624.5	624.5	0.1	0.01	1	0.5
sample32	comb5	0.25	0.0002	M1	234.125	702.375	0.249465	936.5	624.5	624.5	0.1	0.01	1	0.5
sample33	comb5	0.25	0.0002	M1	234.125	702.375	0.249465	936.5	624.5	624.5	0.1	0.01	1	0.5
sample34	comb5	0.25	0.0002	M1	234.125	702.375	0.249465	936.5	624.5	624.5	0.1	0.01	1	0.5
sample35	comb5	0.25	0.0002	M1	234.125	702.375	0.249465	936.5	624.5	624.5	0.1	0.01	1	0.5
sample36	comb5	0.25	0.0002	M1	234.125	702.375	0.249465	936.5	624.5	624.5	0.1	0.01	1	0.5
sample37	comb5	0.25	0.0002	M1	234.125	702.375	0.249465	936.5	624.5	624.5	0.1	0.01	1	0.5
sample38	comb5	0.25	0.0002	M1	234.125	702.375	0.249465	936.5	624.5	624.5	0.1	0.01	1	0.5
sample39	comb5	0.25	0.0002	M1	234.125	702.375	0.249465	936.5	624.5	624.5	0.1	0.01	1	0.5
sample40	comb5	0.25	0.0002	M1	234.125	702.375	0.249465	936.5	624.5	624.5	0.1	0.01	1	0.5
sample41	comb5	0.25	0.0002	M2	234.125	702.375	0.249465	936.5	624.5	624.5	0	0	0.85	0.5
sample42	comb5	0.25	0.0002	M2	234.125	702.375	0.249465	936.5	624.5	624.5	0	0	0.85	0.5
sample43	comb5	0.25	0.0002	M2	234.125	702.375	0.249465	936.5	624.5	624.5	0	0	0.85	0.5
sample44	comb5	0.25	0.0002	M2	234.125	702.375	0.249465	936.5	624.5	624.5	0	0	0.85	0.5
sample45	comb5	0.25	0.0002	M2	234.125	702.375	0.249465	936.5	624.5	624.5	0	0	0.85	0.5
sample46	comb5	0.25	0.0002	M2	234.125	702.375	0.249465	936.5	624.5	624.5	0	0	0.85	0.5
sample47	comb5	0.25	0.0002	M2	234.125	702.375	0.249465	936.5	624.5	624.5	0	0	0.85	0.5
sample48	comb5	0.25	0.0002	M2	234.125	702.375	0.249465	936.5	624.5	624.5	0	0	0.85	0.5
sample49	comb5	0.25	0.0002	M2	234.125	702.375	0.249465	936.5	624.5	624.5	0	0	0.85	0.5
sample50	comb5	0.25	0.0002	M2	234.125	702.375	0.249465	936.5	624.5	624.5	0	0	0.85	0.5
sample51	comb5	0.25	0.0002	M2	234.125	702.375	0.249465	936.5	624.5	624.5	0	0	0.85	0.5
sample52	comb5	0.25	0.0002	M2	234.125	702.375	0.249465	936.5	624.5	624.5	0	0	0.85	0.5
sample53	comb5	0.25	0.0002	M2	234.125	702.375	0.249465	936.5	624.5	624.5	0	0	0.85	0.5
sample54	comb5	0.25	0.0002	M2	234.125	702.375	0.249465	936.5	624.5	624.5	0	0	0.85	0.5
sample55	comb5	0.25	0.0002	M2	234.125	702.375	0.249465	936.5	624.5	624.5	0	0	0.85	0.5
sample56	comb5	0.25	0.0002	M2	234.125	702.375	0.249465	936.5	624.5	624.5	0	0	0.85	0.5
sample57	comb5	0.25	0.0002	M2	234.125	702.375	0.249465	936.5	624.5	624.5	0	0	0.85	0.5
sample58	comb5	0.25	0.0002	M2	234.125	702.375	0.249465	936.5	624.5	624.5	0	0	0.85	0.5
sample59	comb5	0.25	0.0002	M2	234.125	702.375	0.249465	936.5	624.5	624.5	0	0	0.85	0.5
sample60	comb5	0.25	0.0002	M2	234.125	702.375	0.249465	936.5	624.5	624.5	0	0	0.85	0.5
sample1	comb6	0.25	0.001	M0	46.625	139.875	0.24729	186.5	124.5	124.5	0	0	1	0.5
sample2	comb6	0.25	0.001	M0	46.625	139.875	0.24729	186.5	124.5	124.5	0	0	1	0.5
sample3	comb6	0.25	0.001	M0	46.625	139.875	0.24729	186.5	124.5	124.5	0	0	1	0.5
sample4	comb6	0.25	0.001	M0	46.625	139.875	0.24729	186.5	124.5	124.5	0	0	1	0.5
sample5	comb6	0.25	0.001	M0	46.625	139.875	0.24729	186.5	124.5	124.5	0	0	1	0.5
sample6	comb6	0.25	0.001	M0	46.625	139.875	0.24729	186.5	124.5	124.5	0	0	1	0.5
sample7	comb6	0.25	0.001	M0	46.625	139.875	0.24729	186.5	124.5	124.5	0	0	1	0.5
sample8	comb6	0.25	0.001	M0	46.625	139.875	0.24729	186.5	124.5	124.5	0	0	1	0.5
sample9	comb6	0.25	0.001	M0	46.625	139.875	0.24729	186.5	124.5	124.5	0	0	1	0.5
sample10	comb6	0.25	0.001	M0	46.625	139.875	0.24729	186.5	124.5	124.5	0	0	1	0.5
sample11	comb6	0.25	0.001	M0	46.625	139.875	0.24729	186.5	124.5	124.5	0	0	1	0.5
sample12	comb6	0.25	0.001	M0	46.625	139.875	0.24729	186.5	124.5	124.5	0	0	1	0.5
sample13	comb6	0.25	0.001	M0	46.625	139.875	0.24729	186.5	124.5	124.5	0	0	1	0.5
sample14	comb6	0.25	0.001	M0	46.625	139.875	0.24729	186.5	124.5	124.5	0	0	1	0.5
sample15	comb6	0.25	0.001	M0	46.625	139.875	0.24729	186.5	124.5	124.5	0	0	1	0.5
sample16	comb6	0.25	0.001	M0	46.625	139.875	0.24729	186.5	124.5	124.5	0	0	1	0.5
sample17	comb6	0.25	0.001	M0	46.625	139.875	0.24729	186.5	124.5	124.5	0	0	1	0.5
sample18	comb6	0.25	0.001	M0	46.625	139.875	0.24729	186.5	124.5	124.5	0	0	1	0.5
sample19	comb6	0.25	0.001	M0	46.625	139.875	0.24729	186.5	124.5	124.5	0	0	1	0.5
sample20	comb6	0.25	0.001	M0	46.625	139.875	0.24729	186.5	124.5	124.5	0	0	1	0.5
sample21	comb6	0.25	0.001	M1	46.625	139.875	0.24729	186.5	124.5	124.5	0.1	0.01	1	0.5
sample22	comb6	0.25	0.001	M1	46.625	139.875	0.24729	186.5	124.5	124.5	0.1	0.01	1	0.5
sample23	comb6	0.25	0.001	M1	46.625	139.875	0.24729	186.5	124.5	124.5	0.1	0.01	1	0.5
sample24	comb6	0.25	0.001	M1	46.625	139.875	0.24729	186.5	124.5	124.5	0.1	0.01	1	0.5
sample25	comb6	0.25	0.001	M1	46.625	139.875	0.24729	186.5	124.5	124.5	0.1	0.01	1	0.5
sample26	comb6	0.25	0.001	M1	46.625	139.875	0.24729	186.5	124.5	124.5	0.1	0.01	1	0.5
sample27	comb6	0.25	0.001	M1	46.625	139.875	0.24729	186.5	124.5	124.5	0.1	0.01	1	0.5
sample28	comb6	0.25	0.001	M1	46.625	139.875	0.24729	186.5	124.5	124.5	0.1	0.01	1	0.5
sample29	comb6	0.25	0.001	M1	46.625	139.875	0.24729	186.5	124.5	124.5	0.1	0.01	1	0.5
sample30	comb6	0.25	0.001	M1	46.625	139.875	0.24729	186.5	124.5	124.5	0.1	0.01	1	0.5
sample31	comb6	0.25	0.001	M1	46.625	139.875	0.24729	186.5	124.5	124.5	0.1	0.01	1	0.5
sample32	comb6	0.25	0.001	M1	46.625	139.875	0.24729	186.5	124.5	124.5	0.1	0.01	1	0.5
sample33	comb6	0.25	0.001	M1	46.625	139.875	0.24729	186.5	124.5	124.5	0.1	0.01	1	0.5
sample34	comb6	0.25	0.001	M1	46.625	139.875	0.24729	186.5	124.5	124.5	0.1	0.01	1	0.5
sample35	comb6	0.25	0.001	M1	46.625	139.875	0.24729	186.5	124.5	124.5	0.1	0.01	1	0.5
sample36	comb6	0.25	0.001	M1	46.625	139.875	0.24729	186.5	124.5	124.5	0.1	0.01	1	0.5
sample37	comb6	0.25	0.001	M1	46.625	139.875	0.24729	186.5	124.5	124.5	0.1	0.01	1	0.5
sample38	comb6	0.25	0.001	M1	46.625	139.875	0.24729	186.5	124.5	124.5	0.1	0.01	1	0.5
sample39	comb6	0.25	0.001	M1	46.625	139.875	0.24729	186.5	124.5	124.5	0.1	0.01	1	0.5
sample40	comb6	0.25	0.001	M1	46.625	139.875	0.24729	186.5	124.5	124.5	0.1	0.01	1	0.5
sample41	comb6	0.25	0.001	M2	46.625	139.875	0.24729	186.5	124.5	124.5	0	0	0.85	0.5
sample42	comb6	0.25	0.001	M2	46.625	139.875	0.24729	186.5	124.5	124.5	0	0	0.85	0.5
sample43	comb6	0.25	0.001	M2	46.625	139.875	0.24729	186.5	124.5	124.5	0	0	0.85	0.5
sample44	comb6	0.25	0.001	M2	46.625	139.875	0.24729	186.5	124.5	124.5	0	0	0.85	0.5
sample45	comb6	0.25	0.001	M2	46.625	139.875	0.24729	186.5	124.5	124.5	0	0	0.85	0.5
sample46	comb6	0.25	0.001	M2	46.625	139.875	0.24729	186.5	124.5	124.5	0	0	0.85	0.5
sample47	comb6	0.25	0.001	M2	46.625	139.875	0.24729	186.5	124.5	124.5	0	0	0.85	0.5
sample48	comb6	0.25	0.001	M2	46.625	139.875	0.24729	186.5	124.5	124.5	0	0	0.85	0.5
sample49	comb6	0.25	0.001	M2	46.625	139.875	0.24729	186.5	124.5	124.5	0	0	0.85	0.5
sample50	comb6	0.25	0.001	M2	46.625	139.875	0.24729	186.5	124.5	124.5	0	0	0.85	0.5
sample51	comb6	0.25	0.001	M2	46.625	139.875	0.24729	186.5	124.5	124.5	0	0	0.85	0.5
sample52	comb6	0.25	0.001	M2	46.625	139.875	0.24729	186.5	124.5	124.5	0	0	0.85	0.5
sample53	comb6	0.25	0.001	M2	46.625	139.875	0.24729	186.5	124.5	124.5	0	0	0.85	0.5
sample54	comb6	0.25	0.001	M2	46.625	139.875	0.24729	186.5	124.5	124.5	0	0	0.85	0.5
sample55	comb6	0.25	0.001	M2	46.625	139.875	0.24729	186.5	124.5	124.5	0	0	0.85	0.5
sample56	comb6	0.25	0.001	M2	46.625	139.875	0.24729	186.5	124.5	124.5	0	0	0.85	0.5
sample57	comb6	0.25	0.001	M2	46.625	139.875	0.24729	186.5	124.5	124.5	0	0	0.85	0.5
sample58	comb6	0.25	0.001	M2	46.625	139.875	0.24729	186.5	124.5	124.5	0	0	0.85	0.5
sample59	comb6	0.25	0.001	M2	46.625	139.875	0.24729	186.5	124.5	124.5	0	0	0.85	0.5
sample60	comb6	0.25	0.001	M2	46.625	139.875	0.24729	186.5	124.5	124.5	0	0	0.85	0.5
sample1	comb7	0.35	4e-08	M0	1.99062e+06	3.69687e+06	0.35	5687499	3.125e+06	3.125e+06	0	0	1	0.5
sample2	comb7	0.35	4e-08	M0	1.99062e+06	3.69687e+06	0.35	5687499	3.125e+06	3.125e+06	0	0	1	0.5
sample3	comb7	0.35	4e-08	M0	1.99062e+06	3.69687e+06	0.35	5687499	3.125e+06	3.125e+06	0	0	1	0.5
sample4	comb7	0.35	4e-08	M0	1.99062e+06	3.69687e+06	0.35	5687499	3.125e+06	3.125e+06	0	0	1	0.5
sample5	comb7	0.35	4e-08	M0	1.99062e+06	3.69687e+06	0.35	5687499	3.125e+06	3.125e+06	0	0	1	0.5
sample6	comb7	0.35	4e-08	M0	1.99062e+06	3.69687e+06	0.35	5687499	3.125e+06	3.125e+06	0	0	1	0.5
sample7	comb7	0.35	4e-08	M0	1.99062e+06	3.69687e+06	0.35	5687499	3.125e+06	3.125e+06	0	0	1	0.5
sample8	comb7	0.35	4e-08	M0	1.99062e+06	3.69687e+06	0.35	5687499	3.125e+06	3.125e+06	0	0	1	0.5
sample9	comb7	0.35	4e-08	M0	1.99062e+06	3.69687e+06	0.35	5687499	3.125e+06	3.125e+06	0	0	1	0.5
sample10	comb7	0.35	4e-08	M0	1.99062e+06	3.69687e+06	0.35	5687499	3.125e+06	3.125e+06	0	0	1	0.5
sample11	comb7	0.35	4e-08	M0	1.99062e+06	3.69687e+06	0.35	5687499	3.125e+06	3.125e+06	0	0	1	0.5
sample12	comb7	0.35	4e-08	M0	1.99062e+06	3.69687e+06	0.35	5687499	3.125e+06	3.125e+06	0	0	1	0.5
sample13	comb7	0.35	4e-08	M0	1.99062e+06	3.69687e+06	0.35	5687499	3.125e+06	3.125e+06	0	0	1	0.5
sample14	comb7	0.35	4e-08	M0	1.99062e+06	3.69687e+06	0.35	5687499	3.125e+06	3.125e+06	0	0	1	0.5
sample15	comb7	0.35	4e-08	M0	1.99062e+06	3.69687e+06	0.35	5687499	3.125e+06	3.125e+06	0	0	1	0.5
sample16	comb7	0.35	4e-08	M0	1.99062e+06	3.69687e+06	0.35	5687499	3.125e+06	3.125e+06	0	0	1	0.5
sample17	comb7	0.35	4e-08	M0	1.99062e+06	3.69687e+06	0.35	5687499	3.125e+06	3.125e+06	0	0	1	0.5
sample18	comb7	0.35	4e-08	M0	1.99062e+06	3.69687e+06	0.35	5687499	3.125e+06	3.125e+06	0	0	1	0.5
sample19	comb7	0.35	4e-08	M0	1.99062e+06	3.69687e+06	0.35	5687499	3.125e+06	3.125e+06	0	0	1	0.5
sample20	comb7	0.35	4e-08	M0	1.99062e+06	3.69687e+06	0.35	5687499	3.125e+06	3.125e+06	0	0	1	0.5
sample21	comb7	0.35	4e-08	M1	1.99062e+06	3.69687e+06	0.35	5687499	3.125e+06	3.125e+06	0.1	0.01	1	0.5
sample22	comb7	0.35	4e-08	M1	1.99062e+06	3.69687e+06	0.35	5687499	3.125e+06	3.125e+06	0.1	0.01	1	0.5
sample23	comb7	0.35	4e-08	M1	1.99062e+06	3.69687e+06	0.35	5687499	3.125e+06	3.125e+06	0.1	0.01	1	0.5
sample24	comb7	0.35	4e-08	M1	1.99062e+06	3.69687e+06	0.35	5687499	3.125e+06	3.125e+06	0.1	0.01	1	0.5
sample25	comb7	0.35	4e-08	M1	1.99062e+06	3.69687e+06	0.35	5687499	3.125e+06	3.125e+06	0.1	0.01	1	0.5
sample26	comb7	0.35	4e-08	M1	1.99062e+06	3.69687e+06	0.35	5687499	3.125e+06	3.125e+06	0.1	0.01	1	0.5
sample27	comb7	0.35	4e-08	M1	1.99062e+06	3.69687e+06	0.35	5687499	3.125e+06	3.125e+06	0.1	0.01	1	0.5
sample28	comb7	0.35	4e-08	M1	1.99062e+06	3.69687e+06	0.35	5687499	3.125e+06	3.125e+06	0.1	0.01	1	0.5
sample29	comb7	0.35	4e-08	M1	1.99062e+06	3.69687e+06	0.35	5687499	3.125e+06	3.125e+06	0.1	0.01	1	0.5
sample30	comb7	0.35	4e-08	M1	1.99062e+06	3.69687e+06	0.35	5687499	3.125e+06	3.125e+06	0.1	0.01	1	0.5
sample31	comb7	0.35	4e-08	M1	1.99062e+06	3.69687e+06	0.35	5687499	3.125e+06	3.125e+06	0.1	0.01	1	0.5
sample32	comb7	0.35	4e-08	M1	1.99062e+06	3.69687e+06	0.35	5687499	3.125e+06	3.125e+06	0.1	0.01	1	0.5
sample33	comb7	0.35	4e-08	M1	1.99062e+06	3.69687e+06	0.35	5687499	3.125e+06	3.125e+06	0.1	0.01	1	0.5
sample34	comb7	0.35	4e-08	M1	1.99062e+06	3.69687e+06	0.35	5687499	3.125e+06	3.125e+06	0.1	0.01	1	0.5
sample35	comb7	0.35	4e-08	M1	1.99062e+06	3.69687e+06	0.35	5687499	3.125e+06	3.125e+06	0.1	0.01	1	0.5
sample36	comb7	0.35	4e-08	M1	1.99062e+06	3.69687e+06	0.35	5687499	3.125e+06	3.125e+06	0.1	0.01	1	0.5
sample37	comb7	0.35	4e-08	M1	1.99062e+06	3.69687e+06	0.35	5687499	3.125e+06	3.125e+06	0.1	0.01	1	0.5
sample38	comb7	0.35	4e-08	M1	1.99062e+06	3.69687e+06	0.35	5687499	3.125e+06	3.125e+06	0.1	0.01	1	0.5
sample39	comb7	0.35	4e-08	M1	1.99062e+06	3.69687e+06	0.35	5687499	3.125e+06	3.125e+06	0.1	0.01	1	0.5
sample40	comb7	0.35	4e-08	M1	1.99062e+06	3.69687e+06	0.35	5687499	3.125e+06	3.125e+06	0.1	0.01	1	0.5
sample41	comb7	0.35	4e-08	M2	1.99062e+06	3.69687e+06	0.35	5687499	3.125e+06	3.125e+06	0	0	0.85	0.5
sample42	comb7	0.35	4e-08	M2	1.99062e+06	3.69687e+06	0.35	5687499	3.125e+06	3.125e+06	0	0	0.85	0.5
sample43	comb7	0.35	4e-08	M2	1.99062e+06	3.69687e+06	0.35	5687499	3.125e+06	3.125e+06	0	0	0.85	0.5
sample44	comb7	0.35	4e-08	M2	1.99062e+06	3.69687e+06	0.35	5687499	3.125e+06	3.125e+06	0	0	0.85	0.5
sample45	comb7	0.35	4e-08	M2	1.99062e+06	3.69687e+06	0.35	5687499	3.125e+06	3.125e+06	0	0	0.85	0.5
sample46	comb7	0.35	4e-08	M2	1.99062e+06	3.69687e+06	0.35	5687499	3.125e+06	3.125e+06	0	0	0.85	0.5
sample47	comb7	0.35	4e-08	M2	1.99062e+06	3.69687e+06	0.35	5687499	3.125e+06	3.125e+06	0	0	0.85	0.5
sample48	comb7	0.35	4e-08	M2	1.99062e+06	3.69687e+06	0.35	5687499	3.125e+06	3.125e+06	0	0	0.85	0.5
sample49	comb7	0.35	4e-08	M2	1.99062e+06	3.69687e+06	0.35	5687499	3.125e+06	3.125e+06	0	0	0.85	0.5
sample50	comb7	0.35	4e-08	M2	1.99062e+06	3.69687e+06	0.35	5687499	3.125e+06	3.125e+06	0	0	0.85	0.5
sample51	comb7	0.35	4e-08	M2	1.99062e+06	3.69687e+06	0.35	5687499	3.125e+06	3.125e+06	0	0	0.85	0.5
sample52	comb7	0.35	4e-08	M2	1.99062e+06	3.69687e+06	0.35	5687499	3.125e+06	3.125e+06	0	0	0.85	0.5
sample53	comb7	0.35	4e-08	M2	1.99062e+06	3.69687e+06	0.35	5687499	3.125e+06	3.125e+06	0	0	0.85	0.5
sample54	comb7	0.35	4e-08	M2	1.99062e+06	3.69687e+06	0.35	5687499	3.125e+06	3.125e+06	0	0	0.85	0.5
sample55	comb7	0.35	4e-08	M2	1.99062e+06	3.69687e+06	0.35	5687499	3.125e+06	3.125e+06	0	0	0.85	0.5
sample56	comb7	0.35	4e-08	M2	1.99062e+06	3.69687e+06	0.35	5687499	3.125e+06	3.125e+06	0	0	0.85	0.5
sample57	comb7	0.35	4e-08	M2	1.99062e+06	3.69687e+06	0.35	5687499	3.125e+06	3.125e+06	0	0	0.85	0.5
sample58	comb7	0.35	4e-08	M2	1.99062e+06	3.69687e+06	0.35	5687499	3.125e+06	3.125e+06	0	0	0.85	0.5
sample59	comb7	0.35	4e-08	M2	1.99062e+06	3.69687e+06	0.35	5687499	3.125e+06	3.125e+06	0	0	0.85	0.5
sample60	comb7	0.35	4e-08	M2	1.99062e+06	3.69687e+06	0.35	5687499	3.125e+06	3.125e+06	0	0	0.85	0.5
sample1	comb8	0.35	0.0002	M0	397.775	738.725	0.349736	1136.5	624.5	624.5	0	0	1	0.5
sample2	comb8	0.35	0.0002	M0	397.775	738.725	0.349736	1136.5	624.5	624.5	0	0	1	0.5
sample3	comb8	0.35	0.0002	M0	397.775	738.725	0.349736	1136.5	624.5	624.5	0	0	1	0.5
sample4	comb8	0.35	0.0002	M0	397.775	738.725	0.349736	1136.5	624.5	624.5	0	0	1	0.5
sample5	comb8	0.35	0.0002	M0	397.775	738.725	0.349736	1136.5	624.5	624.5	0	0	1	0.5
sample6	comb8	0.35	0.0002	M0	397.775	738.725	0.349736	1136.5	624.5	624.5	0	0	1	0.5
sample7	comb8	0.35	0.0002	M0	397.775	738.725	0.349736	1136.5	624.5	624.5	0	0	1	0.5
sample8	comb8	0.35	0.0002	M0	397.775	738.725	0.349736	1136.5	624.5	624.5	0	0	1	0.5
sample9	comb8	0.35	0.0002	M0	397.775	738.725	0.349736	1136.5	624.5	624.5	0	0	1	0.5
sample10	comb8	0.35	0.0002	M0	397.775	738.725	0.349736	1136.5	624.5	624.5	0	0	1	0.5
sample11	comb8	0.35	0.0002	M0	397.775	738.725	0.349736	1136.5	624.5	624.5	0	0	1	0.5
sample12	comb8	0.35	0.0002	M0	397.775	738.725	0.349736	1136.5	624.5	624.5	0	0	1	0.5
sample13	comb8	0.35	0.0002	M0	397.775	738.725	0.349736	1136.5	624.5	624.5	0	0	1	0.5
sample14	comb8	0.35	0.0002	M0	397.775	738.725	0.349736	1136.5	624.5	624.5	0	0	1	0.5
sample15	comb8	0.35	0.0002	M0	397.775	738.725	0.349736	1136.5	624.5	624.5	0	0	1	0.5
sample16	comb8	0.35	0.0002	M0	397.775	738.725	0.349736	1136.5	624.5	624.5	0	0	1	0.5
sample17	comb8	0.35	0.0002	M0	397.775	738.725	0.349736	1136.5	624.5	624.5	0	0	1	0.5
sample18	comb8	0.35	0.0002	M0	397.775	738.725	0.349736	1136.5	624.5	624.5	0	0	1	0.5
sample19	comb8	0.35	0.0002	M0	397.775	738.725	0.349736	1136.5	624.5	624.5	0	0	1	0.5
sample20	comb8	0.35	0.0002	M0	397.775	738.725	0.349736	1136.5	624.5	624.5	0	0	1	0.5
sample21	comb8	0.35	0.0002	M1	397.775	738.725	0.349736	1136.5	624.5	624.5	0.1	0.01	1	0.5
sample22	comb8	0.35	0.0002	M1	397.775	738.725	0.349736	1136.5	624.5	624.5	0.1	0.01	1	0.5
sample23	comb8	0.35	0.0002	M1	397.775	738.725	0.349736	1136.5	624.5	624.5	0.1	0.01	1	0.5
sample24	comb8	0.35	0.0002	M1	397.775	738.725	0.349736	1136.5	624.5	624.5	0.1	0.01	1	0.5
sample25	comb8	0.35	0.0002	M1	397.775	738.725	0.349736	1136.5	624.5	624.5	0.1	0.01	1	0.5
sample26	comb8	0.35	0.0002	M1	397.775	738.725	0.349736	1136.5	624.5	624.5	0.1	0.01	1	0.5
sample27	comb8	0.35	0.0002	M1	397.775	738.725	0.349736	1136.5	624.5	624.5	0.1	0.01	1	0.5
sample28	comb8	0.35	0.0002	M1	397.775	738.725	0.349736	1136.5	624.5	624.5	0.1	0.01	1	0.5
sample29	comb8	0.35	0.0002	M1	397.775	738.725	0.349736	1136.5	624.5	624.5	0.1	0.01	1	0.5
sample30	comb8	0.35	0.0002	M1	397.775	738.725	0.349736	1136.5	624.5	624.5	0.1	0.01	1	0.5
sample31	comb8	0.35	0.0002	M1	397.775	738.725	0.349736	1136.5	624.5	624.5	0.1	0.01	1	0.5
sample32	comb8	0.35	0.0002	M1	397.775	738.725	0.349736	1136.5	624.5	624.5	0.1	0.01	1	0.5
sample33	comb8	0.35	0.0002	M1	397.775	738.725	0.349736	1136.5	624.5	624.5	0.1	0.01	1	0.5
sample34	comb8	0.35	0.0002	M1	397.775	738.725	0.349736	1136.5	624.5	624.5	0.1	0.01	1	0.5
sample35	comb8	0.35	0.0002	M1	397.775	738.725	0.349736	1136.5	624.5	624.5	0.1	0.01	1	0.5
sample36	comb8	0.35	0.0002	M1	397.775	738.725	0.349736	1136.5	624.5	624.5	0.1	0.01	1	0.5
sample37	comb8	0.35	0.0002	M1	397.775	738.725	0.349736	1136.5	624.5	624.5	0.1	0.01	1	0.5
sample38	comb8	0.35	0.0002	M1	397.775	738.725	0.349736	1136.5	624.5	624.5	0.1	0.01	1	0.5
sample39	comb8	0.35	0.0002	M1	397.775	738.725	0.349736	1136.5	624.5	624.5	0.1	0.01	1	0.5
sample40	comb8	0.35	0.0002	M1	397.775	738.725	0.349736	1136.5	624.5	624.5	0.1	0.01	1	0.5
sample41	comb8	0.35	0.0002	M2	397.775	738.725	0.349736	1136.5	624.5	624.5	0	0	0.85	0.5
sample42	comb8	0.35	0.0002	M2	397.775	738.725	0.349736	1136.5	624.5	624.5	0	0	0.85	0.5
sample43	comb8	0.35	0.0002	M2	397.775	738.725	0.349736	1136.5	624.5	624.5	0	0	0.85	0.5
sample44	comb8	0.35	0.0002	M2	397.775	738.725	0.349736	1136.5	624.5	624.5	0	0	0.85	0.5
sample45	comb8	0.35	0.0002	M2	397.775	738.725	0.349736	1136.5	624.5	624.5	0	0	0.85	0.5
sample46	comb8	0.35	0.0002	M2	397.775	738.725	0.349736	1136.5	624.5	624.5	0	0	0.85	0.5
sample47	comb8	0.35	0.0002	M2	397.775	738.725	0.349736	1136.5	624.5	624.5	0	0	0.85	0.5
sample48	comb8	0.35	0.0002	M2	397.775	738.725	0.349736	1136.5	624.5	624.5	0	0	0.85	0.5
sample49	comb8	0.35	0.0002	M2	397.775	738.725	0.349736	1136.5	624.5	624.5	0	0	0.85	0.5
sample50	comb8	0.35	0.0002	M2	397.775	738.725	0.349736	1136.5	624.5	624.5	0	0	0.85	0.5
sample51	comb8	0.35	0.0002	M2	397.775	738.725	0.349736	1136.5	624.5	624.5	0	0	0.85	0.5
sample52	comb8	0.35	0.0002	M2	397.775	738.725	0.349736	1136.5	624.5	624.5	0	0	0.85	0.5
sample53	comb8	0.35	0.0002	M2	397.775	738.725	0.349736	1136.5	624.5	624.5	0	0	0.85	0.5
sample54	comb8	0.35	0.0002	M2	397.775	738.725	0.349736	1136.5	624.5	624.5	0	0	0.85	0.5
sample55	comb8	0.35	0.0002	M2	397.775	738.725	0.349736	1136.5	624.5	624.5	0	0	0.85	0.5
sample56	comb8	0.35	0.0002	M2	397.775	738.725	0.349736	1136.5	624.5	624.5	0	0	0.85	0.5
sample57	comb8	0.35	0.0002	M2	397.775	738.725	0.349736	1136.5	624.5	624.5	0	0	0.85	0.5
sample58	comb8	0.35	0.0002	M2	397.775	738.725	0.349736	1136.5	624.5	624.5	0	0	0.85	0.5
sample59	comb8	0.35	0.0002	M2	397.775	738.725	0.349736	1136.5	624.5	624.5	0	0	0.85	0.5
sample60	comb8	0.35	0.0002	M2	397.775	738.725	0.349736	1136.5	624.5	624.5	0	0	0.85	0.5
sample1	comb9	0.35	0.001	M0	79.275	147.225	0.348664	226.5	124.5	124.5	0	0	1	0.5
sample2	comb9	0.35	0.001	M0	79.275	147.225	0.348664	226.5	124.5	124.5	0	0	1	0.5
sample3	comb9	0.35	0.001	M0	79.275	147.225	0.348664	226.5	124.5	124.5	0	0	1	0.5
sample4	comb9	0.35	0.001	M0	79.275	147.225	0.348664	226.5	124.5	124.5	0	0	1	0.5
sample5	comb9	0.35	0.001	M0	79.275	147.225	0.348664	226.5	124.5	124.5	0	0	1	0.5
sample6	comb9	0.35	0.001	M0	79.275	147.225	0.348664	226.5	124.5	124.5	0	0	1	0.5
sample7	comb9	0.35	0.001	M0	79.275	147.225	0.348664	226.5	124.5	124.5	0	0	1	0.5
sample8	comb9	0.35	0.001	M0	79.275	147.225	0.348664	226.5	124.5	124.5	0	0	1	0.5
sample9	comb9	0.35	0.001	M0	79.275	147.225	0.348664	226.5	124.5	124.5	0	0	1	0.5
sample10	comb9	0.35	0.001	M0	79.275	147.225	0.348664	226.5	124.5	124.5	0	0	1	0.5
sample11	comb9	0.35	0.001	M0	79.275	147.225	0.348664	226.5	124.5	124.5	0	0	1	0.5
sample12	comb9	0.35	0.001	M0	79.275	147.225	0.348664	226.5	124.5	124.5	0	0	1	0.5
sample13	comb9	0.35	0.001	M0	79.275	147.225	0.348664	226.5	124.5	124.5	0	0	1	0.5
sample14	comb9	0.35	0.001	M0	79.275	147.225	0.348664	226.5	124.5	124.5	0	0	1	0.5
sample15	comb9	0.35	0.001	M0	79.275	147.225	0.348664	226.5	124.5	124.5	0	0	1	0.5
sample16	comb9	0.35	0.001	M0	79.275	147.225	0.348664	226.5	124.5	124.5	0	0	1	0.5
sample17	comb9	0.35	0.001	M0	79.275	147.225	0.348664	226.5	124.5	124.5	0	0	1	0.5
sample18	comb9	0.35	0.001	M0	79.275	147.225	0.348664	226.5	124.5	124.5	0	0	1	0.5
sample19	comb9	0.35	0.001	M0	79.275	147.225	0.348664	226.5	124.5	124.5	0	0	1	0.5
sample20	comb9	0.35	0.001	M0	79.275	147.225	0.348664	226.5	124.5	124.5	0	0	1	0.5
sample21	comb9	0.35	0.001	M1	79.275	147.225	0.348664	226.5	124.5	124.5	0.1	0.01	1	0.5
sample22	comb9	0.35	0.001	M1	79.275	147.225	0.348664	226.5	124.5	124.5	0.1	0.01	1	0.5
sample23	comb9	0.35	0.001	M1	79.275	147.225	0.348664	226.5	124.5	124.5	0.1	0.01	1	0.5
sample24	comb9	0.35	0.001	M1	79.275	147.225	0.348664	226.5	124.5	124.5	0.1	0.01	1	0.5
sample25	comb9	0.35	0.001	M1	79.275	147.225	0.348664	226.5	124.5	124.5	0.1	0.01	1	0.5
sample26	comb9	0.35	0.001	M1	79.275	147.225	0.348664	226.5	124.5	124.5	0.1	0.01	1	0.5
sample27	comb9	0.35	0.001	M1	79.275	147.225	0.348664	226.5	124.5	124.5	0.1	0.01	1	0.5
sample28	comb9	0.35	0.001	M1	79.275	147.225	0.348664	226.5	124.5	124.5	0.1	0.01	1	0.5
sample29	comb9	0.35	0.001	M1	79.275	147.225	0.348664	226.5	124.5	124.5	0.1	0.01	1	0.5
sample30	comb9	0.35	0.001	M1	79.275	147.225	0.348664	226.5	124.5	124.5	0.1	0.01	1	0.5
sample31	comb9	0.35	0.001	M1	79.275	147.225	0.348664	226.5	124.5	124.5	0.1	0.01	1	0.5
sample32	comb9	0.35	0.001	M1	79.275	147.225	0.348664	226.5	124.5	124.5	0.1	0.01	1	0.5
sample33	comb9	0.35	0.001	M1	79.275	147.225	0.348664	226.5	124.5	124.5	0.1	0.01	1	0.5
sample34	comb9	0.35	0.001	M1	79.275	147.225	0.348664	226.5	124.5	124.5	0.1	0.01	1	0.5
sample35	comb9	0.35	0.001	M1	79.275	147.225	0.348664	226.5	124.5	124.5	0.1	0.01	1	0.5
sample36	comb9	0.35	0.001	M1	79.275	147.225	0.348664	226.5	124.5	124.5	0.1	0.01	1	0.5
sample37	comb9	0.35	0.001	M1	79.275	147.225	0.348664	226.5	124.5	124.5	0.1	0.01	1	0.5
sample38	comb9	0.35	0.001	M1	79.275	147.225	0.348664	226.5	124.5	124.5	0.1	0.01	1	0.5
sample39	comb9	0.35	0.001	M1	79.275	147.225	0.348664	226.5	124.5	124.5	0.1	0.01	1	0.5
sample40	comb9	0.35	0.001	M1	79.275	147.225	0.348664	226.5	124.5	124.5	0.1	0.01	1	0.5
sample41	comb9	0.35	0.001	M2	79.275	147.225	0.348664	226.5	124.5	124.5	0	0	0.85	0.5
sample42	comb9	0.35	0.001	M2	79.275	147.225	0.348664	226.5	124.5	124.5	0	0	0.85	0.5
sample43	comb9	0.35	0.001	M2	79.275	147.225	0.348664	226.5	124.5	124.5	0	0	0.85	0.5
sample44	comb9	0.35	0.001	M2	79.275	147.225	0.348664	226.5	124.5	124.5	0	0	0.85	0.5
sample45	comb9	0.35	0.001	M2	79.275	147.225	0.348664	226.5	124.5	124.5	0	0	0.85	0.5
sample46	comb9	0.35	0.001	M2	79.275	147.225	0.348664	226.5	124.5	124.5	0	0	0.85	0.5
sample47	comb9	0.35	0.001	M2	79.275	147.225	0.348664	226.5	124.5	124.5	0	0	0.85	0.5
sample48	comb9	0.35	0.001	M2	79.275	147.225	0.348664	226.5	124.5	124.5	0	0	0.85	0.5
sample49	comb9	0.35	0.001	M2	79.275	147.225	0.348664	226.5	124.5	124.5	0	0	0.85	0.5
sample50	comb9	0.35	0.001	M2	79.275	147.225	0.348664	226.5	124.5	124.5	0	0	0.85	0.5
sample51	comb9	0.35	0.001	M2	79.275	147.225	0.348664	226.5	124.5	124.5	0	0	0.85	0.5
sample52	comb9	0.35	0.001	M2	79.275	147.225	0.348664	226.5	124.5	124.5	0	0	0.85	0.5
sample53	comb9	0.35	0.001	M2	79.275	147.225	0.348664	226.5	124.5	124.5	0	0	0.85	0.5
sample54	comb9	0.35	0.001	M2	79.275	147.225	0.348664	226.5	124.5	124.5	0	0	0.85	0.5
sample55	comb9	0.35	0.001	M2	79.275	147.225	0.348664	226.5	124.5	124.5	0	0	0.85	0.5
sample56	comb9	0.35	0.001	M2	79.275	147.225	0.348664	226.5	124.5	124.5	0	0	0.85	0.5
sample57	comb9	0.35	0.001	M2	79.275	147.225	0.348664	226.5	124.5	124.5	0	0	0.85	0.5
sample58	comb9	0.35	0.001	M2	79.275	147.225	0.348664	226.5	124.5	124.5	0	0	0.85	0.5
sample59	comb9	0.35	0.001	M2	79.275	147.225	0.348664	226.5	124.5	124.5	0	0	0.85	0.5
sample60	comb9	0.35	0.001	M2	79.275	147.225	0.348664	226.5	124.5	124.5	0	0	0.85	0.5

## Sheet: Legend
Table S1 - List of simulation settings
Column title	Description
sample	Sample ID
combination	Combination ID
mu	Skewing mean
sigma2	Allele Specific Expression variance
model	Error model, see methods section for description
alpha	alpha parameter of the BetaBinomial distribution associated with mu and sigma2
beta	beta parameter of the BetaBinomial distribution associated with mu and sigma2
m	Mode parameter of the BetaBinomial distribution associated with mu and sigma2
theta	Concentration parameter of the BetaBinomial distribution associated with mu and sigma2
aescape	alpha parameter of the BetaBinomial distribution for escape genes
bescape	beta parameter of the BetaBinomial distribution for escape genes
perr	Probability of training genes being sequencing errors
pierr	Mean of the binomial distribution of sequencing errors
pinac	Probability of a training genes escaping in a sample
piescape	Mean of the binomial distribution of escape gene
