# Supplementary material for: Inferring genes that escape X-Chromosome inactivation reveals important contribution of variable escape genes to sex-biased diseases
Source: HighWire-hosted journal article supplement (doi:10.1101/gr.275677.121), 2021-08-23
Supplement: Supplemental_Table_S2.xlsx [file Supplemental_Table_S2.xlsx]

## Sheet: Supplemental_Table_S2
gene	consensus	set	status	0:100	100:0	50:50	60:40	70:30	80:20	90:10
ABCD1	Mostly S	train	S	0:23	29:0	18:7	33:6	31:1	21:2	26:0
ACOT9	S	train	S	0:28	40:0	26:21	16:5	36:7	10:15
AIFM1	S	train	S	272:0	0:393	120:220	83:251	33:295	44:305	17:355
AKAP17A	PAR	test	E	147:133	153:98	146:132	137:92	111:110	136:93	113:135
AMER1	S	test	unknown	22:0			12:15
AMOT	S	train	unknown		53:0	42:2	36:3	39:0	46:8	51:0
APOO	S	train	S	63:0	0:61	24:59	24:41	8:68	19:55	4:74
ARHGAP4	Discordant	train	unknown	55:0		22:19	8:53	0:30	6:44	0:46
ARHGAP6	Mostly S	train	unknown	37:0		20:9	25:18	9:16	6:28	11:20
ARMCX3	S	train	S	0:52	88:1	60:32	51:11	43:7	83:5	66:0
ASMTL	PAR	test	E	119:110	119:155	171:202	152:173	185:113	145:103	150:147
ATP7A	Mostly S	test	S	0:85	61:0	33:53	45:27	48:12	57:20	55:7
ATRX	S	test	S	0:94	66:2	72:54	66:24	83:26	84:32	117:0
BCOR	Mostly S	train	unknown	3:53	0:36	0:58	0:70	0:52	0:51	0:36
BEX2	S	test	unknown			3:26	5:27	2:21	3:39	0:43
BEX4	S	test	S	98:0	0:100	55:78	37:74	34:61	8:96	22:77
BRCC3	Mostly S	train	S	0:38	50:0		24:16	48:18	45:1	36:1
BRWD3	S	train	S	0:54	0:51	0:75	0:63	0:59	3:62	0:64
BTK	S	train	S	0:152	510:0	314:61	367:32	474:40	512:29	498:18
C1GALT1C1	S	test	S	38:0	0:55	31:18	5:26	13:18	3:52	11:32
CA5BP1	E	test	E	50:16	11:31	9:35	16:46	9:25	14:31	3:37
CCDC22	S	train	S	85:0	0:80	35:40	25:55	14:23	9:69	1:62
CD99	PAR	test	E	313:304	314:150	353:260	354:201	455:222	418:254	351:246
CD99L2	S	train	S	0:105	79:0	71:51	59:37	75:15	79:6	112:7
CENPI	S	train	S	0:37	34:0	29:30	27:19	25:13	43:3	33:4
CHIC1	S	train	S	0:29	35:0	37:18	43:8	46:7	39:4	48:2
CHM	Discordant	train	S	0:37	20:1	22:5	27:12	28:13	73:0	22:0
CLIC2	Mostly S	train	unknown		0:37		5:23	0:24	0:30	0:43
TASL	VE	test	E	49:225	83:8	84:61	65:71	83:55	46:50	52:12
BCLAF3	S	train	unknown				17:11
EOLA2	S	test	unknown			21:7	12:19	6:18	5:29	1:35
STEEP1	Mostly S	train	unknown		45:1	36:3	39:2	42:4	20:12	24:4
CYBB	S	train	S	154:0	0:287	194:26	51:211	37:191	20:200	5:283
INTS6L	S	train	S	42:0	0:43	23:22	22:48	17:36	8:47	9:28
DDX3X	E	test	E	98:48	16:126	76:85	51:92	41:86	29:110	30:99
DHRSX	PAR	test	E	31:70	36:62	49:47	59:74	36:60	22:72	23:89
DKC1	S	test	S	224:0	1:329	96:194	66:219	37:167	40:273	18:276
DNASE1L1	S	train	unknown				13:25
DOCK11	Mostly S	train	S	69:0	69:1	71:38	22:63	23:79	55:10	7:123
DYNLT3	S	train	unknown	0:57	52:4	35:24	19:20	31:18	40:15	56:1
EBP	Mostly S	test	S	175:0	0:209	68:127	69:205	86:208	13:223	10:224
EIF2S3	E	test	E	794:196	190:796	403:594	365:611	364:624	293:705	249:739
ELF4	S	train	S	0:73	165:0	108:63	131:51	130:28	157:18	117:24
FAAH2	S	train	unknown					5:18	1:26
FAM199X	S	test	unknown		0:22		7:20	2:29	0:46	2:34
FAM3A	S	test	S	90:0	0:84	37:70	26:103	9:72	15:71	2:87
FAM50A	S	train	unknown	0:150	143:9	93:35	127:17	66:14	130:16	144:5
CCNQ	S	train	S	0:72	73:0	77:47	46:28	83:12	71:12	92:11
FTSJ1	S	train	unknown				10:11
FTX	S	test	unknown	3:23	42:0		15:6	14:18		25:0
G6PD	S	train	S	289:1	0:274	144:133	90:168	53:180	42:189	21:222
GPR174	VE	test	unknown	116:0		49:7	42:13	33:30	24:15
GTPBP6	PAR	test	E	77:73	86:50	87:94	84:49	62:75	73:90	67:61
HCFC1	Mostly VE	test	unknown	420:26	0:329	147:285	142:353	87:324	77:328	15:285
PUDP	E	test	S	0:182	0:130	0:186	0:166	3:203	1:182	1:170
HMGB3	S	test	S	113:0	0:91	72:108	44:56	34:60	12:81	9:102
IDS	S	train	S	355:0	428:0	294:118	395:90	338:74	504:49	513:19
IL1RAPL1	Discordant	test	unknown						19:3
IL3RA	PAR	test	E	57:71	57:90	67:79	75:74	93:83	82:88	78:80
ITM2A	Discordant	train	S	164:0	87:0	79:87	66:61	46:81	24:117	103:13
JPX	E	test	E	37:13	65:8	67:26	49:22	37:30	35:24	71:11
KDM5C	Mostly E	test	E	202:241	279:144	267:220	288:244	256:193	371:183	324:147
NEXMIF	S	train	unknown		21:2		20:1			24:0
KLHL15	S	train	S	46:0	0:52	13:26	8:37	19:33	7:38	5:43
LAMP2	Mostly S	train	S	238:0	2:203	137:126	110:190	69:168	40:212	21:241
MAGEH1	S	test	S	82:0	0:77	33:33	16:50	16:64	16:64	3:93
MAP7D2	Discordant	test	unknown	12:18
MBTPS2	S	train	S	32:0	0:22	24:27	18:32	7:17	6:26	4:42
MED12	S	train	S	0:121	82:0	61:42	92:37	86:7	89:14	97:15
MED14	VE	test	S	36:2	0:40	20:26	13:32	4:34	6:28	4:55
MORF4L2	Mostly S	train	S	209:0	0:256	106:169	82:196	47:181	45:201	25:248
MPP1	S	train	S	0:84	79:0	51:51	51:44	46:28	55:24	59:10
MSL3	Discordant	test	unknown		12:18
STK26	Mostly S	train	unknown	155:0	13:159	52:100	64:147	29:145	31:179	23:127
MTCP1	S	test	unknown		59:0	23:9	25:4	20:2	22:2	36:13
MTMR1	S	train	S	1:106	118:1	99:51	102:47	94:15	115:19	112:12
NONO	Mostly S	test	S	0:95	54:0	48:34	71:27	88:20	37:13	73:11
NSDHL	S	train	S	0:91	0:126	4:115	0:100	0:84	0:123	0:140
NXT2	Mostly S	train	S	0:138	120:0	50:64	65:42	66:19	63:8	96:8
OGT	Mostly S	train	unknown						31:5	24:0
P2RY8	PAR	test	E	241:252	168:129	240:219	272:217	191:216	183:172	175:170
PDK3	S	train	S	0:64	64:0	47:37	49:33	51:13	51:17	83:1
PGK1	S	train	S	0:56	92:0	51:43	63:27	89:15	95:7	87:7
PIR	Discordant	train	S	56:0	0:61	21:44	25:58	10:44	4:51	5:47
PJA1	S	train	S	37:0	0:21	30:17	18:14	0:37	5:19	0:28
PLCXD1	PAR	test	E	111:89	52:67	107:96	77:109	69:73	69:92	54:82
PLXNA3	S	train	S	118:0	0:124	48:72	40:80	13:77	23:101	9:105
POF1B	VE	test	S	0:50	0:65	0:52	2:57	0:48	0:69	3:78
PPP2R3B	PAR	test	E	37:46	15:24	32:29	32:41	31:51	27:27	24:29
PRICKLE3	S	train	S	44:0	0:64	22:35	21:38	17:35	16:53	9:59
PRKX	E	test	E	122:123	72:60	138:115	106:130	93:157	79:136	86:75
PRPS1	S	test	S	185:0	0:181	69:90	49:77	44:111	26:148	16:131
PRPS2	S	train	S	0:183	191:0	119:75	137:80	170:39	172:20	169:9
RAB39B	S	train	S	25:0	0:24	13:20	6:16		3:42	0:34
RBM10	S	train	unknown				10:16
RBM3	S	test	unknown	4:737	2:804	5:814	10:794	2:827	19:787	2:833
RBMX	S	test	unknown	569:46	1:494	316:279	195:371	193:355	104:421	46:464
RENBP	Discordant	test	unknown			19:6			15:6	22:0
RPS4X	Mostly E	test	E	641:354	423:572	483:510	458:538	473:526	427:571	456:536
RRAGB	Mostly S	train	S	64:0	0:56	31:33	8:53	24:45	20:45	8:50
SAT1	S	test	S	283:0	0:197	111:91	83:173	62:155	40:151	19:171
SEPTIN6	Mostly S	test	unknown	114:0	15:81	56:39	54:49	56:47	36:32	30:45
SLC25A43	Mostly S	train	S	0:58	58:1	50:20	43:24	72:2	52:3	69:7
SLC25A6	PAR	test	E	10:19	15:11	15:20		11:20	16:9
SLC38A5	S	train	S	0:153	200:0	125:52	102:36	98:28	137:20	131:6
SLC9A7	S	train	S	88:0	0:138	58:72	31:110	11:70	18:120	7:93
SNX12	S	train	S	0:82	86:0	58:42	67:16	82:8	88:19	101:6
SPIN2B	Mostly S	test	unknown		0:22				5:18
SPIN3	Mostly S	train	S	49:0	0:25	7:38	16:22	9:45	1:54	4:48
SUV39H1	S	test	S	75:0	0:55	21:34	23:37	20:40	14:29	2:62
TAB3	S	test	S	0:92	0:78	0:125	0:116	0:63	3:109	0:88
TAF1	S	train	S	0:94	59:0	55:23	53:21	68:16	66:11	58:6
TBC1D25	S	train	unknown	56:0	3:70	29:62	24:63	26:39	14:60	2:91
TCEAL4	S	train	S	0:259	317:0	205:104	237:136	265:68	289:44	290:23
TCEANC	Mostly E	test	unknown		7:16
TMEM164	S	train	S	0:24	52:0	48:20	64:8	30:6	41:2	54:7
TMEM187	Mostly VE	train	S	1:46	40:0	38:22	24:9	45:9	22:9	22:0
TMSB15B	Mostly S	test	unknown	33:0		23:22	18:8		20:9	32:1
TMSB4X	No call	test	unknown	46:2	14:35	23:21	19:28	12:34	15:37	11:34
TRMT2B	S	train	S	27:0	0:28	17:15			4:24
TRO	Mostly S	train	unknown	0:24				30:5	37:0
TSPYL2	S	train	S	0:24	31:0	40:26	22:8	43:9	48:1	28:4
TXLNG	E	test	E	14:75	115:44	64:27	54:28	72:28	53:28	78:13
UBL4A	S	train	S	131:0	0:172	70:55	62:80	16:94	20:81	9:131
UBQLN2	S	test	unknown	196:0	4:121	80:120	35:101	45:78	25:127	6:122
UPF3B	S	train	S	78:0	0:64	16:37	20:51	12:39	25:67	8:77
USP9X	Mostly E	test	E	145:8	25:171	88:87	70:141	55:112	62:145	42:117
VAMP7	S	train	unknown	0:150	249:5	145:79	129:48	160:54	163:23	165:6
VBP1	S	train	S	199:0	1:212	81:111	55:131	41:109	36:172	9:177
VMA21	S	train	S	145:0	0:130	58:78	55:64	53:81	27:78	3:119
WDR13	S	train	unknown			12:14			12:17
WDR44	S	train	S	68:0	0:65	9:41	13:57	6:36	7:53	4:56
WDR45	S	test	unknown			9:12			22:0	18:3
WWC3	Mostly S	train	unknown	7:140	48:0	51:59	44:42	54:39	41:49	56:17
XIAP	S	train	S	0:113	115:0	69:28	76:21	63:19	73:9	108:3
XIST	Mostly S	test	S	954:0	1:865	420:517	312:621	199:686	125:797	62:833
ZBED1	PAR	test	E	145:151	123:181	166:164	181:194	168:167	150:183	111:256
ZMAT1	Mostly S	test	S	0:21	33:0
ZNF275	S	train	S	0:99	73:0	36:25	41:17	64:13	78:28	62:5
ZNF280C	Mostly S	test	unknown	39:0		11:14	15:13	1:26	6:24
ZNF41	S	train	unknown	0:33			20:9
ZNF75D	S	train	S	0:49	25:0	11:18	23:7	8:29	20:11	1:27
ZRSR2	E	test	E	7:22	17:22	11:11	26:11		6:26	5:23
ZXDB	S	test	S	24:0	0:22					0:28

## Sheet: Legend
Table S2 - Absolute read counts in the single cell-derived lymphoblast cell line mixing experiments
Column title	Description
gene	Gene symbol
consensus	Consensus is the gene’s XCI state as determined in Balaton 2015.
set	Set indicates whether the gene was used in the set of known inactive genes to estimate skewing.
status	Status in non-random samples is the true inactivation status observed in the two non-random cell lines (100:0 and 0:100). Genes where the observed true status were not consistent between the two cell lines were discarded.
	Read counts are ordered by least expressed:most expressed haplotype.
