# Supplementary material for: Inferring genes that escape X-Chromosome inactivation reveals important contribution of variable escape genes to sex-biased diseases
Source: HighWire-hosted journal article supplement (doi:10.1101/gr.275677.121), 2021-08-23
Supplement: Supplemental_Table_S4.xlsx [file Supplemental_Table_S4.xlsx]

## Sheet: Supplemental_Table_S4
Gene	TSS	Number of samples	Number of escapes	% escape	XCI-status	Mean Xi-Expression	Mean Xi-Expression (Escape samples only)	Mean number of SNPs
PLCXD1	276322	53	49	0.924528	E	0.521094	0.55767	2.16981
GTPBP6	303358	54	50	0.925926	E	0.621948	0.657708	1
PPP2R3B	333963	13	13	1	E	0.792298	0.792298	1.15385
IL3RA	1336616	17	17	1	E	0.589906	0.589906	1
SLC25A6	1386152	55	55	1	E	0.846955	0.846955	1.43636
ASMTL	1403139	80	78	0.975	E	0.68106	0.696271	2.2125
P2RY8	1462572	66	66	1	E	0.771533	0.771533	1.16667
AKAP17A	1591593	85	83	0.976471	E	0.754201	0.766641	1.56471
DHRSX	2219516	51	47	0.921569	E	0.680004	0.721388	1.43137
ZBED1	2486414	93	92	0.989247	E	0.728006	0.733392	1.82796
PRKX	3604370	110	107	0.972727	E	0.607048	0.618125	2.56364
PUDP	7048920	101	100	0.990099	E	0.767024	0.774694	4.0198
STS	7219456	59	57	0.966102	E	0.570378	0.586347	1.76271
PNPLA4	7898247	2	1	0.5	VE	0.322151	0.533501	1
TBL1X	9463295	68	7	0.102941	S	0.0382687	0.19758	2.01471
WWC3	10015562	54	9	0.166667	S	0.0429619	0.15599	1.46296
HCCS	11111301	10	2	0.2	S	0.062208	0.29635	1.1
ARHGAP6	11118119	6	0	0	S	0.0078711	#NUM!	1.66667
MSL3	11758159	73	67	0.917808	E	0.507696	0.542726	2.82192
PRPS2	12791355	56	0	0	S	0.0108665	#NUM!	1.14286
TLR7	12867083	82	27	0.329268	VE	0.0883199	0.229232	1.53659
TMSB4X	12975108	83	32	0.385542	VE	0.0923539	0.191262	1.54217
GPX1P1	13378735	5	1	0.2	S	0.0117447	0.0587237	1
RAB9A	13689125	9	5	0.555556	VE	0.135977	0.198623	1
TRAPPC2	13712244	76	54	0.710526	VE	0.232833	0.303474	1.77632
OFD1	13734713	6	5	0.833333	E	0.362635	0.435162	1.16667
GEMIN8	14008279	9	6	0.666667	VE	0.18403	0.276046	1
MOSPD2	14873441	4	0	0	S	0.0118777	#NUM!	1
PIGA	15319451	23	0	0	S	0.000980233	#NUM!	1.3913
PIR	15384799	65	10	0.153846	S	0.0339163	0.143116	1.09231
CA5BP1	15674932	16	15	0.9375	E	0.317297	0.334324	1.8125
AP1S2	15825806	1	0	0	S	0	#NUM!	1
CTPS2	16588003	14	3	0.214286	S	0.0223365	0.040886	1.07143
SYAP1	16719632	18	15	0.833333	E	0.236416	0.271273	1.16667
TXLNG	16786427	93	85	0.913978	E	0.311012	0.328626	3.78495
RBBP7	16839283	8	1	0.125	S	0.0645296	0.289454	1
RBBP7|TXLNG	16839283	9	9	1	E	0.434422	0.434422	1
SCML1	17737468	1	0	0	S	0	#NUM!	1
PHKA2	18892300	12	2	0.166667	S	0.0206672	0.0887718	1.16667
PDHA1	19343893	23	2	0.0869565	S	0.013451	0.111236	2.26087
MAP3K15	19360056	1	0	0	S	0.0808549	#NUM!	1
MAP3K15|PDHA1	19360056	14	2	0.142857	S	0.04216	0.119488	2.14286
SH3KBP1	19533975	14	3	0.214286	S	0.0292723	0.0946352	1.57143
MAP7D2	20006713	19	10	0.526316	VE	0.121279	0.168912	1.21053
EIF1AX	20124518	66	40	0.606061	VE	0.230222	0.373146	2.42424
RPS6KA3	20149911	44	1	0.0227273	S	0.0153335	0.0607289	1.90909
MBTPS2	21839636	19	1	0.0526316	S	0.020716	0.0607289	1.31579
SMS	21940573	19	1	0.0526316	S	0.0273428	0.0924832	1
PRDX4	23664262	4	0	0	S	0.0364854	#NUM!	1
ACOT9	23702253	49	2	0.0408163	S	0.0099924	0.0682451	1
SAT1	23783173	43	7	0.162791	S	0.0253377	0.0875472	1.06977
APOO	23833353	53	4	0.0754717	S	0.0266201	0.207952	1.26415
KLHL15	23983720	14	0	0	S	0.028954	#NUM!	1.35714
EIF2S3	24054716	82	64	0.780488	E	0.23897	0.301774	2.63415
ZFX	24149173	68	67	0.985294	E	0.611421	0.619757	2.27941
PDK3	24465221	1	0	0	S	0	#NUM!	1
POLA1	24693919	27	2	0.0740741	S	0.0257843	0.0702296	1.18519
IL1RAPL1	28587399	1	1	1	E	0.404165	0.404165	1
TASL	30558824	50	42	0.84	E	0.307048	0.345197	1.82
GK	30653359	13	0	0	S	0.0100379	#NUM!	1
TAB3	30827442	13	1	0.0769231	S	0.0307115	0.184288	1.23077
DMD	31097677	49	18	0.367347	VE	0.106043	0.249533	1.44898
TBCAP1	33041395	45	1	0.0222222	S	0.000160511	0.00722299	1
CYBB	37780011	47	3	0.0638298	S	0.017928	0.146399	1.59574
DYNLT3	37836757	33	1	0.030303	S	0.0327428	0.803691	1.21212
RPGR	38269163	1	0	0	S	0	#NUM!	1
MID1IP1	38801432	6	0	0	S	0.0367732	#NUM!	1.5
BCOR	40049815	12	0	0	S	0.0106988	#NUM!	1.16667
ATP6AP2	40580894	32	2	0.0625	S	0.00454113	0.0189942	2.125
CXorf38	40629033	19	12	0.631579	VE	0.120374	0.172153	1
MED14	40648306	79	39	0.493671	VE	0.079401	0.129674	1.26582
USP9X	41085635	42	30	0.714286	VE	0.167105	0.204825	1.14286
DDX3X	41333398	60	59	0.983333	E	0.526866	0.52987	1.1
CASK	41514934	1	0	0	S	0.00704005	#NUM!	1
FUNDC1	44523639	16	15	0.9375	E	0.202335	0.214133	1
KDM6A	44873511	32	31	0.96875	E	0.675508	0.6909	1.15625
GAPDHP65	46439709	1	0	0	S	0	#NUM!	1
KRBOX4	46446857	1	0	0	S	0.0418909	#NUM!	1
CHST7	46573784	2	0	0	S	0.000747479	#NUM!	1
SLC9A7	46605318	67	3	0.0447761	S	0.0256451	0.0384908	1.26866
RP2	46836940	7	1	0.142857	S	0.0360079	0.0832549	1
NDUFB11|RBM10	47142216	14	1	0.0714286	S	0.00872799	0.0844545	1.07143
RBM10	47144869	12	1	0.0833333	S	0.00462247	0.0227219	1
UBA1	47190861	39	36	0.923077	E	0.230088	0.237348	1.12821
CDK16	47217860	17	14	0.823529	E	0.190711	0.214628	1.88235
USP11	47232690	13	1	0.0769231	S	0.0138754	0.0539093	1
ZNF41	47445879	10	0	0	S	0.0109679	#NUM!	1
NUS1P1	47512602	24	0	0	S	0	#NUM!	1.04167
ARAF	47561117	10	0	0	S	0.00379952	#NUM!	1
TIMP1	47582313	72	3	0.0416667	S	0.0100491	0.0426102	1
CFP	47624213	20	1	0.05	S	0.019099	0.250542	1
ELK1	47635521	23	1	0.0434783	S	0.0181566	0.318366	1.47826
WASF4P	47797926	49	2	0.0408163	S	0.00194656	0.0427853	1.59184
ZNF182	47974851	1	0	0	S	0	#NUM!	1
SLC38A5	48458537	18	1	0.0555556	S	0.0127296	0.0786104	1
FTSJ1	48476153	22	1	0.0454545	S	0.0129366	0.0874459	1.40909
PORCN	48508962	2	0	0	S	0.00523603	#NUM!	1
EBP	48521158	4	0	0	S	0	#NUM!	1
TBC1D25	48539457	59	5	0.0847458	S	0.0215328	0.0506577	1.66102
RBM3	48574449	43	5	0.116279	S	0.00846629	0.0594683	2.06977
WDR13	48590042	6	1	0.166667	S	0.0461448	0.137501	1
WAS	48676596	6	3	0.5	VE	0.0610764	0.107279	1
SUV39H1	48695554	53	3	0.0566038	S	0.0172307	0.032982	1.09434
HDAC6	48801377	8	2	0.25	S	0.0555666	0.182222	1
TIMM17B	48893447	39	0	0	S	0.00729369	#NUM!	1.02564
PQBP1	48897912	1	1	1	E	0.618462	0.618462	1
SLC35A2	48903182	6	0	0	S	0.0301621	#NUM!	1
PIM2	48913182	27	6	0.222222	S	0.0715613	0.230936	1.40741
OTUD5	48922028	12	4	0.333333	VE	0.0514948	0.137905	1.66667
GRIPAP1	48973723	57	5	0.0877193	S	0.053546	0.339508	1.19298
TFE3	49028731	36	0	0	S	0.0111986	#NUM!	1
PRAF2|WDR45	49071156	3	0	0	S	0.0675995	#NUM!	1
PRAF2	49071156	12	2	0.166667	S	0.0391047	0.176357	1.33333
WDR45	49071726	1	0	0	S	0	#NUM!	1
GPKOW	49113396	16	1	0.0625	S	0.0127668	0.0393108	1
PLP2	49171926	1	0	0	S	0.143377	#NUM!	1
PRICKLE3	49174802	27	3	0.111111	S	0.0182247	0.135361	1
CCDC22	49235467	46	1	0.0217391	S	0.0154877	0.237302	1.1087
PPP1R3F	49269843	3	0	0	S	0.0173207	#NUM!	1
GSPT2	51743385	12	0	0	S	0.0105373	#NUM!	1.16667
MAGED1	51803007	39	5	0.128205	S	0.0361471	0.221842	1.02564
TSPYL2	53082367	19	1	0.0526316	S	0.0207607	0.102855	1.15789
KDM5C	53191321	11	10	0.909091	E	0.609154	0.67007	1.54545
SMC1A	53374149	43	40	0.930233	E	0.531873	0.561528	1.18605
HSD17B10	53431258	1	1	1	E	0.19405	0.19405	1
HUWE1	53532096	55	8	0.145455	S	0.0321577	0.129467	1.32727
PHF8	53936676	44	2	0.0454545	S	0.0160758	0.0670426	1.31818
TSR2	54440401	24	1	0.0416667	S	0.0186561	0.0674609	1.04167
GNL3L	54530211	5	1	0.2	S	0.0474525	0.107048	1
MAGED2	54807599	81	7	0.0864198	S	0.014916	0.0528242	3.67901
APEX2	55000357	31	1	0.0322581	S	0.00761108	0.189859	1.03226
MAGEH1	55452105	44	3	0.0681818	S	0.0233896	0.19014	1.02273
RRAGB	55717739	1	0	0	S	0	#NUM!	1
UBQLN2	56563593	2	0	0	S	0.0204015	#NUM!	1
SPIN3	56976370	1	0	0	S	0	#NUM!	2
ZXDB	57591836	1	0	0	S	0	#NUM!	1
SPIN4	63347228	4	0	0	S	0	#NUM!	1
AMER1	64185117	4	0	0	S	0.0452659	#NUM!	1.25
ZC4H2	64916370	9	0	0	S	0.0429408	#NUM!	1.88889
LAS1L	65512582	1	0	0	S	0.0453386	#NUM!	1
MSN	65588377	16	1	0.0625	S	0.0628788	0.705959	1.875
HEPH	66162549	1	0	0	S	0	#NUM!	1
EDA2R	66595637	37	5	0.135135	S	0.0372044	0.206542	2.16216
YIPF6	68498323	1	0	0	S	0.237837	#NUM!	1
PJA1	69160851	26	0	0	S	0.0204522	#NUM!	1.46154
IGBP1	70133449	11	1	0.0909091	S	0.0227126	0.0646436	1.09091
KIF4A	70290029	22	2	0.0909091	S	0.0448515	0.371561	1.59091
SNX12	71059244	66	3	0.0454545	S	0.0151157	0.106963	1.28788
FOXO4	71096197	3	0	0	S	0.050777	#NUM!	1
CXorf65	71103889	1	0	0	S	0	#NUM!	1
IL2RG	71107404	2	1	0.5	VE	0.00431034	0.00862069	1
MED12	71118556	41	3	0.0731707	S	0.0178874	0.0864417	1
ZMYM3	71239624	26	0	0	S	0.00446216	#NUM!	1
NONO	71283192	27	0	0	S	0.00788388	#NUM!	1.03704
TAF1	71366264	13	1	0.0769231	S	0.0201227	0.0975133	1.38462
OGT	71533083	16	2	0.125	S	0.0146858	0.0565368	1.25
PIN4	72181353	28	5	0.178571	S	0.0598925	0.235646	1.10714
ERCC6L	72204660	21	1	0.047619	S	0.0478484	0.273976	1
RPS4X	72255679	63	62	0.984127	E	0.617896	0.62381	1.1746
HDAC8	72329516	24	1	0.0416667	S	0.0117317	0.107612	1.08333
NAP1L2	73212299	1	0	0	S	0	#NUM!	1
CHIC1	73563200	5	0	0	S	0	#NUM!	1
SEPHS1P4	73769248	1	0	0	S	0	#NUM!	1
TSIX|XIST	73792205	92	7	0.076087	S	0.0212345	0.136921	2.27174
XIST	73820651	49	3	0.0612245	S	0.0242972	0.103336	2.16327
JPX	73944324	1	1	1	E	0.19149	0.19149	1
FTX	73963955	6	0	0	S	0.0602116	#NUM!	1
RLIM	74585217	29	3	0.103448	S	0.023605	0.0437251	1.44828
ABCB7	75053280	26	4	0.153846	S	0.0226111	0.117933	1.53846
UPRT	75274085	46	1	0.0217391	S	0.0295949	0.187743	2.13043
TTC3P1	75740706	3	0	0	S	0	#NUM!	1
PBDC1	76172936	3	0	0	S	0.00540878	#NUM!	1
ATRX	77504878	23	1	0.0434783	S	0.0198151	0.247479	1.26087
MAGT1	77826364	2	0	0	S	0.010793	#NUM!	1
COX7B	77899438	4	0	0	S	0.0188145	#NUM!	1
ATP7A	77910697	33	3	0.0909091	S	0.060641	0.473307	1.51515
PGK1	78065188	24	1	0.0416667	S	0.0197954	0.213653	1.70833
TAF9B	78129748	50	2	0.04	S	0.0238649	0.339875	1.46
CYSLTR1	78271464	20	0	0	S	0.0253504	#NUM!	1.5
P2RY10	78945332	11	10	0.909091	E	0.22387	0.243387	1.27273
GPR174	79170972	24	16	0.666667	VE	0.163225	0.236368	1.95833
ITM2A	79360384	90	11	0.122222	S	0.0236958	0.135469	1.27778
BRWD3	80670854	4	0	0	S	0.0212213	#NUM!	1
HMGN5	81113701	12	0	0	S	0.018699	#NUM!	1
SH3BGRL	81201943	65	13	0.2	S	0.0705445	0.309341	1.09231
APOOL	85003826	1	0	0	S	0	#NUM!	1
POF1B	85277396	1	1	1	E	0.0535089	0.0535089	1
CHM	85861180	18	10	0.555556	VE	0.310377	0.540237	1.11111
EIF4A1P10	92113246	4	0	0	S	0	#NUM!	1
FAM133A	93674013	1	1	1	E	0.125446	0.125446	1
DIAPH2	96684663	1	0	0	S	0	#NUM!	1
CSTF2	100820395	7	0	0	S	4.39282e-05	#NUM!	1
TRMT2B	101009346	38	0	0	S	0.0066878	#NUM!	1.18421
CENPI	101098189	37	1	0.027027	S	0.0108669	0.0416274	1.72973
TIMM8A	101345661	2	0	0	S	0	#NUM!	1
BTK	101349447	77	15	0.194805	S	0.0287487	0.126778	1.93506
RPL36A	101390824	1	0	0	S	0	#NUM!	1
GLA	101397803	3	0	0	S	0.0100954	#NUM!	1
GLA|RPL36A-HNRNPH2	101397803	1	0	0	S	0	#NUM!	1
HNRNPH2	101408295	23	3	0.130435	S	0.0143449	0.0596879	1.04348
ARMCX6	101615120	8	1	0.125	S	0.0465237	0.0410923	1
ARMCX3	101622797	64	5	0.078125	S	0.0248881	0.122589	1.125
ARMCX2	101655281	23	4	0.173913	S	0.0442965	0.155677	1.04348
TCEAL2	102125688	1	0	0	S	0	#NUM!	1
ARMCX5	102599168	8	0	0	S	0.012586	#NUM!	1
BEX4	103215092	13	0	0	S	0.0104661	#NUM!	1
TCEAL8	103252995	5	0	0	S	0.00561674	#NUM!	1
BEX2	103309346	5	0	0	S	0	#NUM!	1
TCEAL4	103576231	69	6	0.0869565	S	0.0163956	0.109224	1.2029
TCEAL3	103607451	13	1	0.0769231	S	0.00454098	0.0215562	1
TCEAL1	103628704	2	0	0	S	0.0143525	#NUM!	1
MORF4L2	103675496	49	2	0.0408163	S	0.0163483	0.0274783	1.04082
TMSB15B	103918896	1	0	0	S	0	#NUM!	1
FAM199X	104166620	29	0	0	S	0.00756188	#NUM!	1.17241
RADX	106611930	9	1	0.111111	S	0.01321	0.0197438	1.77778
TBC1D8B	106802680	1	0	0	S	0.0138527	#NUM!	1
RBM41	107064420	5	0	0	S	0.0231268	#NUM!	1.2
PRPS1	107628507	6	1	0.166667	S	0.0100803	0.0560862	1
TSC22D3	107713221	22	2	0.0909091	S	0.0432762	0.380608	1.27273
PSMD10	108084207	1	0	0	S	0.0129999	#NUM!	1
ATG4A	108091668	8	0	0	S	0.00583802	#NUM!	1.125
NXT2	109535781	54	4	0.0740741	S	0.0234537	0.0827608	1.24074
ACSL4	109624244	20	4	0.2	S	0.0569008	0.225309	1.2
TMEM164	110002631	39	3	0.0769231	S	0.0212257	0.129868	1.12821
AMMECR1	110194186	7	1	0.142857	S	0.0231288	0.152579	1.57143
ALG13	111665815	24	12	0.5	VE	0.232192	0.433478	1.16667
AMOT	112774503	4	0	0	S	0.021766	#NUM!	2.25
PLS3	115561174	10	0	0	S	0	#NUM!	1.6
WDR44	118346073	8	0	0	S	0	#NUM!	1.875
DOCK11	118495898	44	5	0.113636	S	0.0185083	0.104457	1.54545
PGRMC1	119236253	17	1	0.0588235	S	0.00873276	0.0727143	1
SLC25A43	119399060	81	7	0.0864198	S	0.0232986	0.113799	2.59259
SLC25A5	119468400	30	2	0.0666667	S	0.00636274	0.0299595	1.96667
STEEP1	119538149	20	3	0.15	S	0.114	0.579869	1.1
UBE2A	119574538	9	1	0.111111	S	0.0240472	0.0204645	1
NKRF	119588337	4	1	0.25	S	0.0386612	0.110317	1
SEPTIN6	119615724	79	45	0.56962	VE	0.22268	0.366452	3.01266
SOWAHD	119758613	2	0	0	S	0	#NUM!	1
RPL39	119786504	14	1	0.0714286	S	0.0694169	0.89857	1
UPF3B	119834022	18	0	0	S	0.00545722	#NUM!	1.38889
RNF113A	119870534	2	0	0	S	0.0370304	#NUM!	1
NDUFA1|RNF113A	119871487	19	1	0.0526316	S	0.0234417	0.164199	1
NKAP	119925051	2	0	0	S	0	#NUM!	1
ZBTB33	120250752	79	3	0.0379747	S	0.0165514	0.185976	1.6962
LAMP2	120427827	95	4	0.0421053	S	0.014156	0.0698715	2.66316
CUL4B	120524609	14	1	0.0714286	S	0.0215467	0.184622	1.21429
MCTS1	120594010	2	0	0	S	0.0330709	#NUM!	1
C1GALT1C1	120625793	56	3	0.0535714	S	0.0214506	0.110542	1.125
HSPA8P1	121203182	16	0	0	S	0	#NUM!	1
THOC2	123600561	12	0	0	S	0.0181593	#NUM!	1
XIAP	123859724	88	5	0.0568182	S	0.0164983	0.119008	3.96591
STAG2	123960212	4	0	0	S	0.000590812	#NUM!	1.25
OCRL	129539849	3	0	0	S	0	#NUM!	1
SASH3	129779979	80	24	0.3	VE	0.0246824	0.0533971	1.55
ZDHHC9	129803288	23	1	0.0434783	S	0.0495906	0.155027	1
UTP14A	129906121	26	4	0.153846	S	0.0142283	0.062398	1.03846
ELF4	130064874	94	11	0.117021	S	0.0211829	0.0819622	2.08511
AIFM1	130129362	59	1	0.0169492	S	0.00987579	0.0807592	1.15254
RAB33A	130171649	6	0	0	S	0.015656	#NUM!	1
RBMX2	130401969	2	0	0	S	0.0283324	#NUM!	1
ENOX2	130623376	2	0	0	S	0.00529189	#NUM!	1.5
RAP2C	132203025	15	1	0.0666667	S	0.0369902	0.278566	1
MBNL3	132369317	42	3	0.0714286	S	0.0342034	0.225333	1.45238
GPC4	133300103	8	0	0	S	0.0079131	#NUM!	1
PHF6	134373253	62	3	0.0483871	S	0.0236537	0.147756	1.14516
HPRT1	134460153	1	0	0	S	0	#NUM!	1
PABIR2	134769566	21	2	0.0952381	S	0.0743797	0.674166	1.19048
RTL8C	135032303	2	0	0	S	0	#NUM!	1
ZNF75D	135248920	17	1	0.0588235	S	0.0292657	0.212435	1.64706
INTS6L	135520659	48	1	0.0208333	S	0.0196164	0.064566	1.08333
MMGT1	135962070	5	0	0	S	0.0356683	#NUM!	1.6
SLC9A6	135985439	22	0	0	S	0.0203814	#NUM!	1.18182
MAP7D3	136213222	44	5	0.113636	S	0.0242026	0.081754	1.65909
HTATSF1	136497079	37	0	0	S	0.00828949	#NUM!	1.02703
ARHGEF6	136665547	9	1	0.111111	S	0.00707512	0.0636761	1.33333
RBMX	136848004	12	0	0	S	0.0152819	#NUM!	1.25
ATP11C	139726346	32	1	0.03125	S	0.016355	0.0860995	1.46875
FMR1	147911951	54	3	0.0555556	S	0.01835	0.0229211	1.2963
IDS	149476990	103	3	0.0291262	S	0.0143596	0.0650247	4.72816
EOLA1	149540355	39	6	0.153846	S	0.0545339	0.294665	2.30769
EOLA2	149929527	20	8	0.4	VE	0.166164	0.399702	1.1
MTMR1	150692962	76	7	0.0921053	S	0.0266131	0.183551	1.42105
CD99L2	150766337	91	9	0.0989011	S	0.0285754	0.20246	1.89011
HMGB3	150980509	16	0	0	S	0.00266571	#NUM!	1.0625
VMA21	151396515	69	5	0.0724638	S	0.0311803	0.290991	1.68116
MAGEA6	152698736	1	1	1	E	0.325102	0.325102	1
MAGEA3	152766136	1	1	1	E	0.0424147	0.0424147	1
CETN2	152826973	8	0	0	S	0.0151409	#NUM!	2
NSDHL	152830967	45	1	0.0222222	S	0.0163121	0.390255	1.11111
ZNF275	153334155	82	8	0.097561	S	0.0198434	0.0911661	2.12195
HAUS7	153447666	43	2	0.0465116	S	0.0142479	0.210654	1.06977
CCNQ	153587919	4	0	0	S	0.0294381	#NUM!	1
BCAP31	153700492	6	0	0	S	0.0035992	#NUM!	1
IDH3G	153785766	11	0	0	S	0.00275721	#NUM!	1.18182
SSR4	153793516	2	0	0	S	0	#NUM!	1
ARHGAP4	153907367	83	10	0.120482	S	0.0407023	0.290048	1.40964
NAA10	153929242	5	4	0.8	E	0.465184	0.552171	1
RENBP	153935263	11	1	0.0909091	S	0.0281554	0.119855	1
HCFC1	153947553	80	38	0.475	VE	0.0700547	0.116593	2.2625
TMEM187	153972327	1	0	0	S	0	#NUM!	1
IRAK1	154010500	63	3	0.047619	S	0.0184721	0.140922	2.15873
MECP2	154021573	15	0	0	S	0.00646864	#NUM!	1.13333
FLNA	154348524	58	4	0.0689655	S	0.0136335	0.0949205	1.96552
EMD	154379197	11	3	0.272727	VE	0.0506221	0.137412	2
RPL10	154389955	39	1	0.025641	S	0.00979139	0.0886066	2.07692
DNASE1L1	154401238	43	7	0.162791	S	0.0407523	0.219164	1.46512
DNASE1L1|RPL10	154401238	31	3	0.0967742	S	0.0325994	0.141873	1.41935
TAFAZZIN	154411518	6	1	0.166667	S	0.0865028	0.164053	1
ATP6AP1	154428632	35	3	0.0857143	S	0.0175568	0.11053	1.77143
GDI1	154436920	39	3	0.0769231	S	0.00837334	0.0284244	1.05128
FAM50A	154444126	7	0	0	S	0.0141409	#NUM!	1
PLXNA3	154458281	9	0	0	S	0.00831622	#NUM!	1
LAGE3	154477688	35	1	0.0285714	S	0.00526647	0.0217177	1.11429
UBL4A	154483717	35	0	0	S	0.00792587	#NUM!	2.74286
SLC10A3	154487306	4	0	0	S	0.00585679	#NUM!	1.5
FAM3A	154505019	53	2	0.0377358	S	0.0362699	0.384404	1.24528
G6PD	154531391	44	2	0.0454545	S	0.0117916	0.0370341	1.70455
IKBKG	154541199	1	0	0	S	0	#NUM!	1
DKC1	154762756	35	0	0	S	0.00819356	#NUM!	1.17143
MPP1	154778684	1	0	0	S	0	#NUM!	1
FUNDC2	155025980	3	1	0.333333	VE	0.0223308	0.0449171	1
CMC4|MTCP1	155061622	1	0	0	S	0	#NUM!	1
MTCP1	155061622	2	0	0	S	0	#NUM!	1
BRCC3	155071420	34	2	0.0588235	S	0.00871718	0.0466764	1.14706
VBP1	155197007	51	2	0.0392157	S	0.0167272	0.051954	1.23529
RAB39B	155258241	11	0	0	S	0.0139798	#NUM!	1.27273
CLIC2	155276211	25	8	0.32	VE	0.0470575	0.0840161	1.4
TMLHE	155490115	1	0	0	S	0	#NUM!	1
GS1-358P8.4		54	4	0.0740741	S	0.0246799	0.195664	2.77778
STK26		79	28	0.35443	VE	0.102755	0.265303	1.12658
RP11-1148L6.5		55	5	0.0909091	S	0.0184147	0.0360664	1.01818
RP11-258C19.7		1	1	1	E	0.0309017	0.0309017	1
RP11-357C3.3		6	0	0	S	0.0285752	#NUM!	1
RP11-622K12.1		40	8	0.2	S	0.0450885	0.184473	1
RP11-706O15.1		92	92	1	E	0.634863	0.634863	3.29348
RP11-706O15.5		1	1	1	E	0.456995	0.456995	1
RP3-368A4.5		1	0	0	S	0	#NUM!	1
RP3-368A4.6		1	1	1	E	0.323161	0.323161	1
RP5-1000K24.2		1	0	0	S	0.027528	#NUM!	1
RP6-105D16.1		54	0	0	S	0.000469453	#NUM!	1
RP6-99M1.2		1	0	0	S	0	#NUM!	2

## Sheet: Legend
Table S4 - GEUVADIS XCIR states predicted by XCIR
Column title	Description
Gene	Gene symbol
TSS	Coordinates of transcription start site (hg38)
Number of samples	Number of samples with at least one informative SNP
Number of escapes	Number of samples where escape is predicted for the gene
% escape	Fraction of samples where escape is predicted
XCI-status	Gene XCI state classification
Mean Xi-expression	Average predicted expression from the inactive X
Mean Xi-Expression (Escape samples only)	Average predicted expression from the inactive X in the escape samples
Mean number of SNPs	Average number of informative SNPs per sample
