# Supplementary material for: Inferring genes that escape X-Chromosome inactivation reveals important contribution of variable escape genes to sex-biased diseases
Source: HighWire-hosted journal article supplement (doi:10.1101/gr.275677.121), 2021-08-23
Supplement: Supplemental_Table_S5.xlsx [file Supplemental_Table_S5.xlsx]

## Sheet: Legend
Table S5 - XCIR’s sample level predictions in GEUVADIS
Column title	Description
sample	1000 Genome Project sample ID
Gene	Gene symbol
XCI-status	XCI state predicted by XCIR
Reads haplotype 1	Read count on haplotype 1
Reads haplotype 2	Read count on haplotype 2
Total	Total read count
Number of SNPs	Number of informative SNPs for the gene
Number of training genes	Number of informative genes in the training set of inactivated genes
Skewing	Skewing estimated by XCIR
Allelic ratio	Allele specific expression ratio
P-value	XCIR's t-test p-value
Xi-expr	Xi expression as a fraction of total expression

## Sheet: HG00137
sample	Gene	XCI-status	Reads allele 1	Reads allele 2	Total	Number of SNPs used	Number of training genes	Skewing	Allelic ratio	P-value	Xi-expr
HG00137	ABCB7	S	57	27	84	1	19	0.404919	0.321429	0.8838	0
HG00137	ACOT9	S	48	34	82	1	19	0.404919	0.414634	0.445128	0.0538385
HG00137	AIFM1	S	39	32	71	1	19	0.404919	0.450704	0.266788	0.317122
HG00137	AKAP17A	S	55	55	110	2	19	0.404919	0.5	0.0715413	1
HG00137	ASMTL	S	127	117	244	4	19	0.404919	0.479508	0.0874459	0.645387
HG00137	BRCC3	S	26	33	59	2	19	0.404919	0.440678	0.323439	0.231594
HG00137	BTK	S	291	171	462	3	19	0.404919	0.37013	0.754109	0
HG00137	C1GALT1C1	S	17	28	45	1	19	0.404919	0.377778	0.624196	0
HG00137	CD99L2	S	63	144	207	4	19	0.404919	0.304348	0.962336	0
HG00137	CFP	S	28	17	45	1	19	0.404919	0.377778	0.624196	0
HG00137	CLIC2	S	48	28	76	2	19	0.404919	0.368421	0.693837	0
HG00137	TASL	S	99	89	188	2	19	0.404919	0.473404	0.117109	0.562845
HG00137	CXorf38	S	12	16	28	1	19	0.404919	0.428571	0.409051	0.142048
HG00137	DNASE1L1	S	16	24	40	1	19	0.404919	0.4	0.521907	0
HG00137	EIF2S3	S	158	75	233	5	19	0.404919	0.321888	0.933034	0
HG00137	ELF4	S	27	19	46	1	19	0.404919	0.413043	0.46196	0.0446299
HG00137	FMR1	S	27	33	60	1	19	0.404919	0.45	0.280703	0.310729
HG00137	GTPBP6	S	28	14	42	1	19	0.404919	0.333333	0.792206	0
HG00137	HAUS7	S	23	24	47	1	19	0.404919	0.489362	0.158595	0.798744
HG00137	PUDP	E	203	212	415	5	19	0.404919	0.489157	0.0498906	0.795262
HG00137	HTATSF1	S	31	59	90	1	19	0.404919	0.344444	0.811186	0
HG00137	IDS	S	166	191	357	3	19	0.404919	0.464986	0.124407	0.461716
HG00137	LAMP2	S	139	77	216	4	19	0.404919	0.356481	0.80595	0
HG00137	MAGED1	S	103	62	165	1	19	0.404919	0.375758	0.689174	0
HG00137	MED14	S	9	16	25	1	19	0.404919	0.36	0.661682	0
HG00137	MSL3	S	16	14	30	1	19	0.404919	0.466667	0.268537	0.480847
HG00137	MTMR1	S	31	44	75	2	19	0.404919	0.413333	0.453685	0.0462959
HG00137	NSDHL	S	22	38	60	1	19	0.404919	0.366667	0.688919	0
HG00137	NXT2	S	13	10	23	1	19	0.404919	0.434783	0.39441	0.186299
HG00137	P2RY8	S	22	22	44	1	19	0.404919	0.5	0.135701	1
HG00137	PIR	S	20	12	32	1	19	0.404919	0.375	0.620505	0
HG00137	PLCXD1	S	15	8	23	1	19	0.404919	0.347826	0.695697	0
HG00137	RBM10	S	11	23	34	1	19	0.404919	0.323529	0.803608	0
HG00137	RBM3	S	224	179	403	2	19	0.404919	0.444169	0.222314	0.260082
HG00137	RBMX	S	90	61	151	1	19	0.404919	0.403974	0.506265	0
HG00137	RP11-622K12.1	S	134	92	226	1	19	0.404919	0.40708	0.484526	0.0114919
HG00137	RP11-706O15.1	E	128	126	254	5	19	0.404919	0.496063	0.0476152	0.920479
HG00137	RP6-105D16.1	S	99	1	100	1	19	0.404919	0.01	1	0
HG00137	SASH3	S	80	138	218	1	19	0.404919	0.366972	0.75087	0
HG00137	SEPTIN6	S	331	365	696	4	19	0.404919	0.475575	0.0740615	0.59123
HG00137	SLC25A43	S	18	18	36	1	19	0.404919	0.5	0.153737	1
HG00137	SLC25A6	S	113	123	236	1	19	0.404919	0.478814	0.0906604	0.635556
HG00137	SLC9A6	S	17	12	29	1	19	0.404919	0.413793	0.465132	0.0489495
HG00137	SNX12	S	50	36	86	1	19	0.404919	0.418605	0.42188	0.0775486
HG00137	STS	S	69	59	128	4	19	0.404919	0.460938	0.185169	0.417601
HG00137	TBC1D25	S	22	10	32	1	19	0.404919	0.3125	0.828362	0
HG00137	TIMM8A	S	18	12	30	1	19	0.404919	0.4	0.519609	0
HG00137	TIMP1	S	110	69	179	1	19	0.404919	0.385475	0.631011	0
HG00137	TLR7	S	47	21	68	1	19	0.404919	0.308824	0.901314	0
HG00137	TRAPPC2	S	41	39	80	2	19	0.404919	0.4875	0.122137	0.767617
HG00137	TRMT2B	S	17	11	28	1	19	0.404919	0.392857	0.546684	0
HG00137	TXLNG	S	85	111	196	5	19	0.404919	0.433673	0.307339	0.178147
HG00137	UBA1	S	143	103	246	1	19	0.404919	0.418699	0.40092	0.0781262
HG00137	UPRT	S	23	18	41	1	19	0.404919	0.439024	0.350332	0.218544
HG00137	VBP1	S	75	58	133	1	19	0.404919	0.43609	0.307475	0.196056
HG00137	WWC3	S	64	22	86	1	19	0.404919	0.255814	0.984115	0
HG00137	XIAP	S	83	146	229	7	19	0.404919	0.362445	0.777704	0
HG00137	ZBED1	S	50	46	96	2	19	0.404919	0.479167	0.135045	0.640539
HG00137	ZBTB33	S	14	33	47	1	19	0.404919	0.297872	0.897602	0
HG00137	ZFX	S	58	66	124	4	19	0.404919	0.467742	0.15938	0.493351
HG00137	ZNF275	S	36	59	95	2	19	0.404919	0.378947	0.649759	0

## Sheet: HG00154
sample	Gene	XCI-status	Reads allele 1	Reads allele 2	Total	Number of SNPs used	Number of training genes	Skewing	Allelic ratio	P-value	Xi-expr
HG00154	ABCB7	S	11	55	66	1	22	0.132823	0.166667	0.220793	0.0483123
HG00154	ACOT9	S	76	10	86	1	22	0.132823	0.116279	0.663888	0
HG00154	AIFM1	S	109	12	121	1	22	0.132823	0.0991736	0.840284	0
HG00154	APEX2	E	51	17	68	1	22	0.132823	0.25	0.00346344	0.189859
HG00154	ARMCX2	S	20	3	23	1	22	0.132823	0.130435	0.513223	0
HG00154	ARMCX5	S	20	5	25	1	22	0.132823	0.2	0.165907	0.100688
HG00154	ATP6AP2	S	21	115	136	1	22	0.132823	0.154412	0.251351	0.0302882
HG00154	BRCC3	S	37	0	37	1	22	0.132823	0	0.989618	0
HG00154	BTK	S	20	215	235	1	22	0.132823	0.0851064	0.966237	0
HG00154	CD99L2	S	16	84	100	2	22	0.132823	0.16	0.229075	0.0384297
HG00154	CLIC2	E	28	9	37	1	22	0.132823	0.243243	0.0272886	0.176974
HG00154	CYSLTR1	S	2	20	22	1	22	0.132823	0.0909091	0.715456	0
HG00154	EIF2S3	S	41	8	49	2	22	0.132823	0.163265	0.272861	0.0432468
HG00154	ELF4	S	11	47	58	1	22	0.132823	0.189655	0.111473	0.0838819
HG00154	ERCC6L	S	2	21	23	1	22	0.132823	0.0869565	0.737801	0
HG00154	FAM199X	S	17	4	21	1	22	0.132823	0.190476	0.221896	0.0851969
HG00154	GK	S	6	28	34	1	22	0.132823	0.176471	0.232666	0.0631921
HG00154	GS1-358P8.4	E	186	46	232	5	22	0.132823	0.198276	0.0062788	0.0978508
HG00154	HDHD1	E	246	125	371	4	22	0.132823	0.336927	4.1005e-20	0.38492
HG00154	HTATSF1	S	9	83	92	1	22	0.132823	0.0978261	0.82165	0
HG00154	HUWE1	S	4	38	42	1	22	0.132823	0.0952381	0.756279	0
HG00154	ITM2A	S	28	150	178	1	22	0.132823	0.157303	0.19887	0.034485
HG00154	KIF4A	E	37	28	65	2	22	0.132823	0.430769	8.5916e-12	0.682724
HG00154	LAMP2	S	62	6	68	1	22	0.132823	0.0882353	0.847916	0
HG00154	MAGED2	S	422	59	481	5	22	0.132823	0.122661	0.687752	0
HG00154	MAP7D3	S	77	10	87	3	22	0.132823	0.114943	0.677095	0
HG00154	MED12	S	23	4	27	1	22	0.132823	0.148148	0.40916	0.0213131
HG00154	MED14	E	9	25	34	1	22	0.132823	0.264706	0.0136912	0.218903
HG00154	MSL3	S	30	8	38	1	22	0.132823	0.210526	0.0853808	0.118332
HG00154	MST4	S	94	10	104	1	22	0.132823	0.0961538	0.845652	0
HG00154	P2RY10	E	37	159	196	2	22	0.132823	0.188776	0.0224731	0.0824764
HG00154	PGK1	S	10	63	73	3	22	0.132823	0.136986	0.460558	0.00570111
HG00154	PIR	S	6	50	56	1	22	0.132823	0.107143	0.706075	0
HG00154	PRKX	E	37	36	73	2	22	0.132823	0.493151	5.10461e-18	0.963375
HG00154	PRPS2	S	177	21	198	1	22	0.132823	0.106061	0.832169	0
HG00154	RBM3	E	154	37	191	1	22	0.132823	0.193717	0.0153458	0.0904195
HG00154	RP11-1148L6.5	S	41	1	42	1	22	0.132823	0.0238095	0.977996	0
HG00154	RP11-706O15.1	E	66	106	172	4	22	0.132823	0.383721	5.99404e-18	0.518967
HG00154	RP2	S	4	18	22	1	22	0.132823	0.181818	0.25284	0.0714878
HG00154	SEPT6	S	172	27	199	1	22	0.132823	0.135678	0.459021	0.00390293
HG00154	SLC9A7	S	1	21	22	1	22	0.132823	0.0454545	0.882363	0
HG00154	TAF9B	S	3	43	46	1	22	0.132823	0.0652174	0.903726	0
HG00154	TBC1D8B	S	3	18	21	1	22	0.132823	0.142857	0.446986	0.0138526
HG00154	TBL1X	S	4	19	23	1	22	0.132823	0.173913	0.284245	0.0592699
HG00154	TCEAL4	S	148	21	169	1	22	0.132823	0.12426	0.614061	0
HG00154	TFE3	S	27	2	29	1	22	0.132823	0.0689655	0.839015	0
HG00154	TIMM17B	S	127	24	151	1	22	0.132823	0.15894	0.198832	0.0368761
HG00154	TRAPPC2	S	52	5	57	2	22	0.132823	0.0877193	0.83137	0
HG00154	TRMT2B	S	22	2	24	1	22	0.132823	0.0833333	0.758372	0
HG00154	TSIX|XIST	E	97	38	135	2	22	0.132823	0.281481	2.09784e-06	0.253815
HG00154	TSPYL2	S	22	1	23	1	22	0.132823	0.0434783	0.892514	0
HG00154	ZBED1	E	40	21	61	2	22	0.132823	0.344262	1.74695e-06	0.404347
HG00154	ZDHHC9	S	3	28	31	1	22	0.132823	0.0967742	0.718082	0
HG00154	ZFX	E	26	10	36	1	22	0.132823	0.277778	0.00636846	0.245936
HG00154	ZNF275	S	21	6	27	1	22	0.132823	0.222222	0.0901193	0.138613

## Sheet: HG00174
sample	Gene	XCI-status	Reads allele 1	Reads allele 2	Total	Number of SNPs used	Number of training genes	Skewing	Allelic ratio	P-value	Xi-expr
HG00174	ABCB7	S	12	19	31	1	6	0.290503	0.387097	0.118088	0.299608
HG00174	AIFM1	E	66	39	105	1	6	0.290503	0.371429	0.0338924	0.239376
HG00174	AKAP17A	S	7	17	24	1	6	0.290503	0.291667	0.494991	0.00278478
HG00174	APEX2	S	41	13	54	1	6	0.290503	0.240741	0.789718	0
HG00174	APOO	S	60	18	78	2	6	0.290503	0.230769	0.877378	0
HG00174	ARHGAP4	E	33	48	81	2	6	0.290503	0.407407	0.0102407	0.386986
HG00174	CYSLTR1	S	21	3	24	1	6	0.290503	0.125	0.962942	0
HG00174	DHRSX	S	8	15	23	1	6	0.290503	0.347826	0.272413	0.158495
HG00174	EIF1AX	S	176	27	203	4	6	0.290503	0.133005	1	0
HG00174	ELF4	S	85	28	113	3	6	0.290503	0.247788	0.841371	0
HG00174	HAUS7	S	21	10	31	1	6	0.290503	0.322581	0.347015	0.0829056
HG00174	HDHD1	S	23	38	61	1	6	0.290503	0.377049	0.0682652	0.26033
HG00174	HMGB3	S	17	40	57	1	6	0.290503	0.298246	0.448777	0.0188267
HG00174	ITM2A	S	163	41	204	1	6	0.290503	0.20098	0.997569	0
HG00174	KDM6A	S	17	12	29	1	6	0.290503	0.413793	0.0718143	0.416937
HG00174	LAS1L	S	23	59	82	1	6	0.290503	0.280488	0.579164	0
HG00174	MAGED2	S	132	36	168	4	6	0.290503	0.214286	0.985215	0
HG00174	MAGEH1	S	26	7	33	1	6	0.290503	0.212121	0.839347	0
HG00174	NXT2	S	15	11	26	1	6	0.290503	0.423077	0.0682468	0.462865
HG00174	P2RY10	S	88	45	133	2	6	0.290503	0.338346	0.112139	0.128904
HG00174	PIR	S	28	14	42	1	6	0.290503	0.333333	0.270472	0.113861
HG00174	RP11-1148L6.5	S	20	6	26	1	6	0.290503	0.230769	0.748854	0
HG00174	RP11-706O15.1	E	63	91	154	3	6	0.290503	0.409091	0.000595031	0.394758
HG00174	SLC25A43	S	21	4	25	1	6	0.290503	0.16	0.924677	0
HG00174	SLC25A5	S	363	146	509	2	6	0.290503	0.286837	0.572262	0
HG00174	TAF9B	S	34	13	47	1	6	0.290503	0.276596	0.583169	0
HG00174	TBCAP1	S	75	0	75	1	6	0.290503	0	1	0
HG00174	TCEAL2	S	60	3	63	1	6	0.290503	0.047619	0.999989	0
HG00174	TCEAL4	S	104	39	143	1	6	0.290503	0.272727	0.680172	0
HG00174	TIMP1	S	75	29	104	1	6	0.290503	0.278846	0.603275	0
HG00174	TMSB4X	S	23	5	28	1	6	0.290503	0.178571	0.903984	0
HG00174	TRAPPC2	S	23	6	29	1	6	0.290503	0.206897	0.839329	0
HG00174	XIAP	S	46	22	68	3	6	0.290503	0.323529	0.274301	0.0855676
HG00174	ZBED1	S	33	18	51	2	6	0.290503	0.352941	0.163016	0.175114
HG00174	ZBTB33	S	32	14	46	1	6	0.290503	0.304348	0.418074	0.0341719
HG00174	ZFX	S	17	31	48	2	6	0.290503	0.354167	0.165646	0.179167
HG00174	ZMYM3	S	10	27	37	1	6	0.290503	0.27027	0.606835	0

## Sheet: HG00177
sample	Gene	XCI-status	Reads allele 1	Reads allele 2	Total	Number of SNPs used	Number of training genes	Skewing	Allelic ratio	P-value	Xi-expr
HG00177	ABCB7	S	46	2	48	1	16	0.0723682	0.0416667	0.794163	0
HG00177	ACOT9	S	3	64	67	1	16	0.0723682	0.0447761	0.808309	0
HG00177	AIFM1	S	5	80	85	1	16	0.0723682	0.0588235	0.685084	0
HG00177	AKAP17A	E	89	84	173	3	16	0.0723682	0.485549	5.5696e-98	0.934624
HG00177	APOO	S	0	31	31	1	16	0.0723682	0	0.940042	0
HG00177	ARHGAP4	S	4	76	80	1	16	0.0723682	0.05	0.779993	0
HG00177	ATP11C	S	1	31	32	1	16	0.0723682	0.03125	0.815336	0
HG00177	BTK	E	211	26	237	2	16	0.0723682	0.109705	0.0132636	0.0456477
HG00177	CCDC22	S	55	5	60	2	16	0.0723682	0.0833333	0.371526	0.0129873
HG00177	DDX26B	S	56	4	60	1	16	0.0723682	0.0666667	0.567673	0
HG00177	DDX3X	E	121	80	201	1	16	0.0723682	0.39801	2.53661e-71	0.614857
HG00177	DHRSX	E	12	9	21	1	16	0.0723682	0.428571	1.48754e-10	0.713748
HG00177	DMD	S	19	3	22	1	16	0.0723682	0.136364	0.123329	0.0808771
HG00177	DOCK11	E	47	8	55	1	16	0.0723682	0.145455	0.0182207	0.0934396
HG00177	DYNLT3	S	1	24	25	1	16	0.0723682	0.04	0.733895	0
HG00177	EDA2R	S	1	48	49	2	16	0.0723682	0.0204082	0.919811	0
HG00177	GTPBP6	E	18	11	29	1	16	0.0723682	0.37931	8.87765e-11	0.559785
HG00177	HCFC1	E	19	118	137	4	16	0.0723682	0.138686	0.00136819	0.084059
HG00177	HDHD1	E	205	236	441	6	16	0.0723682	0.464853	2.31343e-222	0.848103
HG00177	IDS	S	5	44	49	1	16	0.0723682	0.102041	0.211374	0.0359411
HG00177	IRAK1	S	15	215	230	3	16	0.0723682	0.0652174	0.662229	0
HG00177	KDM6A	E	25	17	42	1	16	0.0723682	0.404762	4.62275e-17	0.63571
HG00177	MAGEH1	S	5	51	56	1	16	0.0723682	0.0892857	0.312557	0.0201797
HG00177	MED12	E	20	4	24	1	16	0.0723682	0.166667	0.0372942	0.12392
HG00177	MED14	S	25	3	28	1	16	0.0723682	0.107143	0.23879	0.0423829
HG00177	MORF4L2	S	197	20	217	1	16	0.0723682	0.0921659	0.13017	0.0236966
HG00177	MSL3	E	37	14	51	2	16	0.0723682	0.27451	1.26222e-08	0.309501
HG00177	MTMR1	S	42	3	45	1	16	0.0723682	0.0666667	0.558677	0
HG00177	NSDHL	S	3	52	55	1	16	0.0723682	0.0545455	0.695025	0
HG00177	PHF6	S	48	6	54	1	16	0.0723682	0.111111	0.135923	0.0474488
HG00177	PHF8	S	3	22	25	1	16	0.0723682	0.12	0.178998	0.0589771
HG00177	PIN4	E	53	10	63	1	16	0.0723682	0.15873	0.00407689	0.112319
HG00177	PIR	S	22	1	23	1	16	0.0723682	0.0434783	0.703588	0
HG00177	PLCXD1	E	12	14	26	1	16	0.0723682	0.461538	9.37946e-15	0.834962
HG00177	POLA1	S	0	21	21	1	16	0.0723682	0	0.89972	0
HG00177	PRKX	E	53	75	128	3	16	0.0723682	0.414062	1.21529e-50	0.665332
HG00177	PRPS2	S	71	6	77	1	16	0.0723682	0.0779221	0.425401	0.00653623
HG00177	RP11-1148L6.5	S	34	5	39	1	16	0.0723682	0.128205	0.089178	0.0698462
HG00177	RPS4X	E	167	105	272	2	16	0.0723682	0.386029	5.5065e-89	0.579136
HG00177	SAT1	S	54	5	59	2	16	0.0723682	0.0847458	0.356831	0.0146848
HG00177	SH3BGRL	S	180	15	195	1	16	0.0723682	0.0769231	0.403039	0.00535424
HG00177	SLC25A43	S	0	30	30	1	16	0.0723682	0	0.936972	0
HG00177	SLC25A5	S	42	459	501	2	16	0.0723682	0.0838323	0.161001	0.0135863
HG00177	SNX12	S	35	0	35	1	16	0.0723682	0	0.950775	0
HG00177	SUV39H1	S	29	1	30	1	16	0.0723682	0.0333333	0.795366	0
HG00177	TAF9B	S	42	1	43	1	16	0.0723682	0.0232558	0.893062	0
HG00177	TBC1D25	S	46	4	50	2	16	0.0723682	0.08	0.417505	0.0090037
HG00177	TFE3	S	35	5	40	1	16	0.0723682	0.125	0.0994412	0.0655741
HG00177	TIMM17B	S	74	5	79	1	16	0.0723682	0.0632911	0.622245	0
HG00177	TIMP1	S	102	1	103	1	16	0.0723682	0.00970874	0.992944	0
HG00177	TLR7	S	33	3	36	1	16	0.0723682	0.0833333	0.399777	0.0129873
HG00177	TMSB4X	S	40	3	43	1	16	0.0723682	0.0697674	0.52624	0
HG00177	TRAPPC2	E	24	7	31	1	16	0.0723682	0.225806	0.000488177	0.218627
HG00177	TSIX|XIST	S	13	218	231	2	16	0.0723682	0.0562771	0.82739	0
HG00177	TXLNG	E	121	43	164	4	16	0.0723682	0.262195	3.22382e-21	0.285267
HG00177	WASF4P	S	1	47	48	2	16	0.0723682	0.0208333	0.915903	0
HG00177	WWC3	S	31	2	33	1	16	0.0723682	0.0606061	0.60287	0
HG00177	XIAP	S	7	65	72	3	16	0.0723682	0.0972222	0.207835	0.0299299
HG00177	ZBED1	E	26	25	51	2	16	0.0723682	0.490196	5.44844e-31	0.955175
HG00177	ZBTB33	S	65	1	66	2	16	0.0723682	0.0151515	0.963596	0
HG00177	ZNF75D	E	35	10	45	2	16	0.0723682	0.222222	5.22657e-05	0.212436

## Sheet: HG00365
sample	Gene	XCI-status	Reads allele 1	Reads allele 2	Total	Number of SNPs used	Number of training genes	Skewing	Allelic ratio	P-value	Xi-expr
HG00365	ABCB7	E	29	70	99	1	32	0.201608	0.292929	0.0308163	0.180668
HG00365	AKAP17A	E	71	101	172	2	32	0.201608	0.412791	1.52203e-07	0.547671
HG00365	ARAF	S	21	93	114	1	32	0.201608	0.184211	0.645453	0
HG00365	ARHGAP4	S	21	90	111	1	32	0.201608	0.189189	0.604116	0
HG00365	ATP6AP1	S	132	482	614	4	32	0.201608	0.214984	0.338452	0.0229266
HG00365	ATP7A	S	12	53	65	2	32	0.201608	0.184615	0.617458	0
HG00365	ATRX	E	16	34	50	1	32	0.201608	0.32	0.030176	0.247479
HG00365	BCOR	S	12	46	58	2	32	0.201608	0.206897	0.464544	0.00894069
HG00365	BTK	E	155	78	233	2	32	0.201608	0.334764	0.000242916	0.287204
HG00365	C1GALT1C1	S	10	47	57	1	32	0.201608	0.175439	0.669084	0
HG00365	CCDC22	S	16	62	78	1	32	0.201608	0.205128	0.47359	0.00593333
HG00365	CD99L2	S	71	17	88	2	32	0.201608	0.193182	0.565756	0
HG00365	CENPI	S	61	10	71	3	32	0.201608	0.140845	0.865346	0
HG00365	CHM	S	7	26	33	1	32	0.201608	0.212121	0.444255	0.0179321
HG00365	CXorf56	S	48	12	60	2	32	0.201608	0.2	0.510938	0
HG00365	CYSLTR1	S	15	38	53	2	32	0.201608	0.283019	0.0930752	0.157965
HG00365	DNASE1L1	E	26	57	83	2	32	0.201608	0.313253	0.0158249	0.23013
HG00365	DNASE1L1|RPL10	S	19	58	77	2	32	0.201608	0.246753	0.198871	0.0818381
HG00365	ELF4	S	260	41	301	3	32	0.201608	0.136213	0.965052	0
HG00365	EMD	S	10	45	55	2	32	0.201608	0.181818	0.62784	0
HG00365	FAM199X	S	40	6	46	1	32	0.201608	0.130435	0.862474	0
HG00365	FAM3A	S	22	73	95	2	32	0.201608	0.231579	0.272657	0.052876
HG00365	FLNA	S	50	177	227	1	32	0.201608	0.220264	0.313576	0.0322699
HG00365	FUNDC1	E	29	55	84	1	32	0.201608	0.345238	0.00274944	0.316956
HG00365	G6PD	S	36	145	181	1	32	0.201608	0.198895	0.526591	0
HG00365	GDI1	S	36	141	177	1	32	0.201608	0.20339	0.482636	0.00299437
HG00365	GNL3L	S	94	29	123	1	32	0.201608	0.235772	0.226455	0.0607234
HG00365	GPR174	E	11	22	33	1	32	0.201608	0.333333	0.0394995	0.283244
HG00365	GTPBP6	E	38	28	66	1	32	0.201608	0.424242	4.1128e-05	0.595041
HG00365	HCFC1	S	15	74	89	1	32	0.201608	0.168539	0.742924	0
HG00365	HDAC6	S	20	73	93	1	32	0.201608	0.215054	0.393832	0.0230494
HG00365	HMGB3	S	22	2	24	1	32	0.201608	0.0833333	0.914786	0
HG00365	ITM2A	S	23	131	154	1	32	0.201608	0.149351	0.890356	0
HG00365	LAMP2	S	28	138	166	2	32	0.201608	0.168675	0.785462	0
HG00365	MAP7D3	S	53	19	72	2	32	0.201608	0.263889	0.127528	0.116521
HG00365	MBNL3	S	11	30	41	1	32	0.201608	0.268293	0.16475	0.125796
HG00365	MBTPS2	S	12	46	58	2	32	0.201608	0.206897	0.464544	0.00894069
HG00365	MED12	S	12	64	76	1	32	0.201608	0.157895	0.792446	0
HG00365	MED14	S	18	70	88	1	32	0.201608	0.204545	0.476987	0.00494619
HG00365	MORF4L2	S	183	54	237	2	32	0.201608	0.227848	0.245036	0.0459911
HG00365	NONO	S	37	186	223	1	32	0.201608	0.165919	0.822582	0
HG00365	NUS1P1	S	74	2	76	1	32	0.201608	0.0263158	0.999458	0
HG00365	NXT2	S	60	15	75	2	32	0.201608	0.2	0.511901	0
HG00365	P2RY8	E	90	91	181	2	32	0.201608	0.497238	1.82458e-13	0.981654
HG00365	PGK1	E	23	52	75	3	32	0.201608	0.306667	0.0256427	0.213653
HG00365	PHF6	S	27	87	114	1	32	0.201608	0.236842	0.224959	0.0627441
HG00365	PHF8	S	6	32	38	1	32	0.201608	0.157895	0.732084	0
HG00365	PIGA	S	5	19	24	1	32	0.201608	0.208333	0.468935	0.0113974
HG00365	PIN4	S	18	77	95	1	32	0.201608	0.189474	0.596721	0
HG00365	PLCXD1	E	40	55	95	3	32	0.201608	0.421053	4.74902e-06	0.581558
HG00365	POLA1	S	10	59	69	1	32	0.201608	0.144928	0.846012	0
HG00365	PRICKLE3	S	11	56	67	1	32	0.201608	0.164179	0.747228	0
HG00365	PRKX	E	35	43	78	2	32	0.201608	0.448718	1.6541e-06	0.706686
HG00365	RAP2C	S	16	58	74	1	32	0.201608	0.216216	0.393704	0.0250922
HG00365	RLIM	S	13	59	72	2	32	0.201608	0.180556	0.649781	0
HG00365	RP11-1148L6.5	S	12	54	66	1	32	0.201608	0.181818	0.63684	0
HG00365	RP11-706O15.1	E	83	161	244	4	32	0.201608	0.340164	0.000121676	0.302373
HG00365	RP6-105D16.1	S	0	82	82	1	32	0.201608	0	0.999944	0
HG00365	RPL10	S	69	215	284	3	32	0.201608	0.242958	0.128749	0.0744455
HG00365	RPS4X	S	9	19	28	1	32	0.201608	0.321429	0.068473	0.251215
HG00365	SASH3	S	353	84	437	2	32	0.201608	0.19222	0.609704	0
HG00365	SAT1	S	11	78	89	1	32	0.201608	0.123596	0.938103	0
HG00365	SEPT6	E	12	10	22	1	32	0.201608	0.454545	0.00240897	0.735611
HG00365	SH3BGRL	S	37	187	224	1	32	0.201608	0.165179	0.827791	0
HG00365	SLC25A43	S	13	53	66	1	32	0.201608	0.19697	0.532693	0
HG00365	SMS	S	6	39	45	1	32	0.201608	0.133333	0.850284	0
HG00365	SNX12	S	27	102	129	1	32	0.201608	0.209302	0.43189	0.0130611
HG00365	STS	E	39	27	66	2	32	0.201608	0.409091	0.000121396	0.532962
HG00365	SUV39H1	S	7	33	40	1	32	0.201608	0.175	0.649914	0
HG00365	TAF9B	S	16	43	59	1	32	0.201608	0.271186	0.119262	0.131976
HG00365	TAZ	E	26	65	91	1	32	0.201608	0.285714	0.0472447	0.164053
HG00365	TBC1D25	S	13	80	93	2	32	0.201608	0.139785	0.892226	0
HG00365	TBL1X	S	117	15	132	3	32	0.201608	0.113636	0.975894	0
HG00365	THOC2	S	11	58	69	1	32	0.201608	0.15942	0.776016	0
HG00365	TLR7	S	8	39	47	1	32	0.201608	0.170213	0.686419	0
HG00365	TRAPPC2	E	26	52	78	2	32	0.201608	0.333333	0.00658545	0.283244
HG00365	TRMT2B	S	41	5	46	1	32	0.201608	0.108696	0.922906	0
HG00365	TSIX|XIST	S	373	100	473	3	32	0.201608	0.211416	0.384133	0.0167099
HG00365	UTP14A	S	86	22	108	1	32	0.201608	0.203704	0.482392	0.00352374
HG00365	VMA21	S	14	59	73	1	32	0.201608	0.191781	0.571625	0
HG00365	WWC3	S	58	8	66	1	32	0.201608	0.121212	0.922482	0
HG00365	XIAP	S	10	54	64	1	32	0.201608	0.15625	0.786081	0
HG00365	ZNF75D	S	5	18	23	1	32	0.201608	0.217391	0.428786	0.0271654

## Sheet: NA11840
sample	Gene	XCI-status	Reads allele 1	Reads allele 2	Total	Number of SNPs used	Number of training genes	Skewing	Allelic ratio	P-value	Xi-expr
NA11840	ABCB7	S	78	8	86	1	30	0.0767449	0.0930233	0.312488	0.019607
NA11840	ACOT9	S	4	56	60	1	30	0.0767449	0.0666667	0.603858	0
NA11840	AIFM1	E	86	14	100	1	30	0.0767449	0.14	0.022418	0.0807592
NA11840	AKAP17A	E	37	39	76	2	30	0.0767449	0.486842	3.3044e-32	0.9397
NA11840	APOO	S	8	89	97	2	30	0.0767449	0.0824742	0.428675	0.00681426
NA11840	ARMCX2	E	22	7	29	1	30	0.0767449	0.241379	0.000800641	0.241443
NA11840	ASMTL	E	97	97	194	3	30	0.0767449	0.5	5.4457e-62	1
NA11840	ATP11C	S	3	26	29	1	30	0.0767449	0.103448	0.30438	0.0325727
NA11840	ATP6AP2	S	137	9	146	1	30	0.0767449	0.0616438	0.706631	0
NA11840	ATP7A	S	28	2	30	1	30	0.0767449	0.0666667	0.577743	0
NA11840	BRCC3	S	2	36	38	1	30	0.0767449	0.0526316	0.698673	0
NA11840	BTK	S	192	21	213	1	30	0.0767449	0.0985915	0.190096	0.0264916
NA11840	C1GALT1C1	S	46	3	49	1	30	0.0767449	0.0612245	0.645537	0
NA11840	CCDC22	S	44	5	49	1	30	0.0767449	0.102041	0.271455	0.030803
NA11840	CD99L2	S	5	74	79	3	30	0.0767449	0.0632911	0.652238	0
NA11840	DDX3X	E	125	53	178	1	30	0.0767449	0.297753	1.52275e-17	0.353329
NA11840	DHRSX	E	31	28	59	2	30	0.0767449	0.474576	2.70501e-25	0.886673
NA11840	DMD	S	4	40	44	1	30	0.0767449	0.0909091	0.372359	0.0170172
NA11840	DOCK11	E	90	19	109	2	30	0.0767449	0.174312	0.000713104	0.130273
NA11840	EIF1AX	S	33	270	303	4	30	0.0767449	0.108911	0.0794586	0.0394992
NA11840	EIF2S3	S	0	83	83	1	30	0.0767449	0	0.988526	0
NA11840	ELF4	S	171	6	177	3	30	0.0767449	0.0338983	0.948925	0
NA11840	EMD	S	6	36	42	2	30	0.0767449	0.142857	0.0681061	0.084716
NA11840	ERCC6L	S	23	1	24	1	30	0.0767449	0.0416667	0.731493	0
NA11840	FAM3A	S	5	52	57	1	30	0.0767449	0.0877193	0.389398	0.0131345
NA11840	FMR1	S	3	35	38	1	30	0.0767449	0.0789474	0.481038	0.00260858
NA11840	G6PD	S	7	77	84	1	30	0.0767449	0.0833333	0.422258	0.00784407
NA11840	GEMIN8	S	3	63	66	1	30	0.0767449	0.0454545	0.802118	0
NA11840	GK	S	1	20	21	1	30	0.0767449	0.047619	0.685159	0
NA11840	GS1-358P8.4	S	22	258	280	4	30	0.0767449	0.0785714	0.46869	0.00216235
NA11840	GSPT2	S	24	2	26	1	30	0.0767449	0.0769231	0.498703	0.000210499
NA11840	HAUS7	S	0	32	32	1	30	0.0767449	0	0.937834	0
NA11840	HDHD1	E	342	289	631	5	30	0.0767449	0.458003	2.94947e-81	0.819466
NA11840	HMGB3	S	1	32	33	1	30	0.0767449	0.030303	0.827091	0
NA11840	HUWE1	S	36	2	38	1	30	0.0767449	0.0526316	0.698673	0
NA11840	IDS	S	45	500	545	5	30	0.0767449	0.0825688	0.387871	0.00692753
NA11840	ITM2A	S	112	8	120	1	30	0.0767449	0.0666667	0.633226	0
NA11840	LAGE3	S	12	125	137	1	30	0.0767449	0.0875912	0.350999	0.0129793
NA11840	LAMP2	S	234	24	258	3	30	0.0767449	0.0930233	0.246146	0.019607
NA11840	MAGED1	S	157	10	167	1	30	0.0767449	0.0598802	0.736458	0
NA11840	MAGED2	S	231	27	258	4	30	0.0767449	0.104651	0.119564	0.03409
NA11840	MAP7D2	E	28	192	220	1	30	0.0767449	0.127273	0.020324	0.0634785
NA11840	MED12	S	23	1	24	1	30	0.0767449	0.0416667	0.731493	0
NA11840	MED14	E	79	19	98	2	30	0.0767449	0.193878	0.00011286	0.160593
NA11840	MORF4L2	S	207	18	225	1	30	0.0767449	0.08	0.447233	0.00386013
NA11840	NONO	S	20	1	21	1	30	0.0767449	0.047619	0.685159	0
NA11840	NXT2	S	35	3	38	1	30	0.0767449	0.0789474	0.481038	0.00260858
NA11840	PGK1	S	25	1	26	1	30	0.0767449	0.0384615	0.757616	0
NA11840	PHF6	S	53	6	59	1	30	0.0767449	0.101695	0.258636	0.030369
NA11840	PIGA	S	2	86	88	2	30	0.0767449	0.0227273	0.949067	0
NA11840	PIR	S	9	106	115	1	30	0.0767449	0.0782609	0.479873	0.00179403
NA11840	PJA1	S	51	3	54	2	30	0.0767449	0.0555556	0.702124	0
NA11840	PLCXD1	E	39	20	59	2	30	0.0767449	0.338983	5.01135e-12	0.448829
NA11840	PPP2R3B	E	12	11	23	1	30	0.0767449	0.478261	2.09934e-12	0.902295
NA11840	RAB39B	S	3	19	22	1	30	0.0767449	0.136364	0.156653	0.0757648
NA11840	RLIM	S	21	1	22	1	30	0.0767449	0.0454545	0.701668	0
NA11840	RP11-706O15.1	E	52	71	123	3	30	0.0767449	0.422764	2.35436e-32	0.69136
NA11840	RPS4X	E	133	113	246	1	30	0.0767449	0.45935	1.39827e-57	0.824747
NA11840	RPS6KA3	S	4	69	73	3	30	0.0767449	0.0547945	0.732232	0
NA11840	SMS	S	1	29	30	1	30	0.0767449	0.0333333	0.800885	0
NA11840	STS	E	78	133	211	3	30	0.0767449	0.369668	4.13932e-32	0.529137
NA11840	TAF1	S	19	2	21	1	30	0.0767449	0.0952381	0.379745	0.0223343
NA11840	TAF9B	S	42	1	43	1	30	0.0767449	0.0232558	0.888329	0
NA11840	TBL1X	S	55	1	56	2	30	0.0767449	0.0178571	0.932729	0
NA11840	TCEAL4	S	122	5	127	1	30	0.0767449	0.0393701	0.90085	0
NA11840	TFE3	S	57	4	61	1	30	0.0767449	0.0655738	0.615562	0
NA11840	TIMM17B	S	213	9	222	1	30	0.0767449	0.0405405	0.929258	0
NA11840	TLR7	S	8	61	69	2	30	0.0767449	0.115942	0.139518	0.0485525
NA11840	TMSB4X	S	10	65	75	2	30	0.0767449	0.133333	0.0532701	0.071638
NA11840	TRMT2B	S	24	2	26	1	30	0.0767449	0.0769231	0.498703	0.000210499
NA11840	TSIX|XIST	S	10	101	111	2	30	0.0767449	0.0900901	0.33034	0.0160174
NA11840	TXLNG	E	37	148	185	5	30	0.0767449	0.2	9.58106e-07	0.170417
NA11840	UBA1	E	178	72	250	1	30	0.0767449	0.288	4.66865e-19	0.332552
NA11840	UBL4A	S	18	167	185	4	30	0.0767449	0.0972973	0.213581	0.0248831
NA11840	UTP14A	S	45	2	47	1	30	0.0767449	0.0425532	0.790506	0
NA11840	VBP1	S	27	334	361	2	30	0.0767449	0.0747922	0.535365	0
NA11840	VMA21	S	3	66	69	2	30	0.0767449	0.0434783	0.820876	0
NA11840	WASF4P	S	1	41	42	1	30	0.0767449	0.0238095	0.883578	0
NA11840	XIAP	S	88	6	94	3	30	0.0767449	0.0638298	0.655657	0
NA11840	ZBTB33	S	91	4	95	2	30	0.0767449	0.0421053	0.859631	0
NA11840	ZFX	E	80	128	208	6	30	0.0767449	0.384615	5.25621e-35	0.57157
NA11840	ZMYM3	S	58	3	61	1	30	0.0767449	0.0491803	0.765792	0
NA11840	ZNF275	S	6	48	54	1	30	0.0767449	0.111111	0.194776	0.0423154

## Sheet: NA12383
sample	Gene	XCI-status	Reads allele 1	Reads allele 2	Total	Number of SNPs used	Number of training genes	Skewing	Allelic ratio	P-value	Xi-expr
NA12383	ABCB7	S	35	0	35	1	21	0.00145709	0	0.589396	0
NA12383	AIFM1	S	0	93	93	1	21	0.00145709	0	0.643707	0
NA12383	AKAP17A	E	7	14	21	1	21	0.00145709	0.333333	0	0.498905
NA12383	ARHGAP4	E	62	3	65	1	21	0.00145709	0.0461538	1.73925e-21	0.0469312
NA12383	ARMCX3	S	39	0	39	1	21	0.00145709	0	0.594276	0
NA12383	ASMTL	E	45	46	91	3	21	0.00145709	0.494505	0	0.978198
NA12383	ATP6AP1	S	229	1	230	3	21	0.00145709	0.00434783	0.12521	0.00290761
NA12383	BRCC3	S	24	0	24	1	21	0.00145709	0	0.574224	0
NA12383	BTK	S	232	1	233	1	21	0.00145709	0.00429185	0.128314	0.00285114
NA12383	C1GALT1C1	S	0	34	34	1	21	0.00145709	0	0.588131	0
NA12383	CCDC22	S	0	24	24	1	21	0.00145709	0	0.574224	0
NA12383	CD99L2	S	0	25	25	1	21	0.00145709	0	0.575737	0
NA12383	CFP	S	0	44	44	1	21	0.00145709	0	0.600016	0
NA12383	CLIC2	E	82	7	89	2	21	0.00145709	0.0786517	1.4675e-81	0.0839171
NA12383	CXorf21	E	19	38	57	2	21	0.00145709	0.333333	0	0.498905
NA12383	DHRSX	E	21	26	47	2	21	0.00145709	0.446809	0	0.807184
NA12383	DNASE1L1|RPL10	S	63	0	63	2	21	0.00145709	0	0.619132	0
NA12383	EIF1AX	E	12	21	33	1	21	0.00145709	0.363636	0	0.570445
NA12383	ELF4	S	0	134	134	3	21	0.00145709	0	0.670826	0
NA12383	FAM3A	S	41	0	41	1	21	0.00145709	0	0.596616	0
NA12383	FLNA	S	223	0	223	1	21	0.00145709	0	0.715812	0
NA12383	GDI1	S	87	0	87	1	21	0.00145709	0	0.639193	0
NA12383	HAUS7	S	27	0	27	1	21	0.00145709	0	0.57867	0
NA12383	HCFC1	E	33	8	41	1	21	0.00145709	0.195122	3.86439e-232	0.24105
NA12383	HDHD1	E	145	120	265	4	21	0.00145709	0.45283	0	0.827126
NA12383	IDS	S	255	1	256	6	21	0.00145709	0.00390625	0.152133	0.00246236
NA12383	IRAK1	S	84	0	84	2	21	0.00145709	0	0.636871	0
NA12383	KDM6A	E	9	12	21	1	21	0.00145709	0.428571	0	0.749361
NA12383	MAGED2	S	0	99	99	1	21	0.00145709	0	0.648058	0
NA12383	MBNL3	S	0	32	32	1	21	0.00145709	0	0.585541	0
NA12383	MED12	S	0	27	27	1	21	0.00145709	0	0.57867	0
NA12383	MORF4L2	E	151	2	153	1	21	0.00145709	0.0130719	8.27985e-05	0.011786
NA12383	MST4	S	0	43	43	1	21	0.00145709	0	0.598897	0
NA12383	MTMR1	S	31	0	31	1	21	0.00145709	0	0.584215	0
NA12383	NAA10	E	70	133	203	1	21	0.00145709	0.344828	0	0.52526
NA12383	NSDHL	S	50	0	50	1	21	0.00145709	0	0.606463	0
NA12383	NXT2	S	22	0	22	1	21	0.00145709	0	0.571099	0
NA12383	PHF8	S	0	23	23	1	21	0.00145709	0	0.572679	0
NA12383	PIGA	S	0	22	22	1	21	0.00145709	0	0.571099	0
NA12383	PRKX	E	28	28	56	2	21	0.00145709	0.5	0	1
NA12383	RAP2C	S	0	59	59	1	21	0.00145709	0	0.615399	0
NA12383	RBM3	S	0	218	218	1	21	0.00145709	0	0.713627	0
NA12383	RP11-1148L6.5	E	1	27	28	1	21	0.00145709	0.0357143	1.00559e-06	0.0355797
NA12383	RP11-622K12.1	E	2	113	115	1	21	0.00145709	0.0173913	3.73682e-06	0.0162403
NA12383	RP11-706O15.1	E	35	7	42	1	21	0.00145709	0.166667	1.15911e-173	0.198599
NA12383	RPL10	S	258	0	258	1	21	0.00145709	0	0.730253	0
NA12383	SH3BGRL	S	230	0	230	1	21	0.00145709	0	0.718816	0
NA12383	SLC25A43	S	0	100	100	4	21	0.00145709	0	0.648768	0
NA12383	SLC25A6	E	255	223	478	2	21	0.00145709	0.466527	0	0.874166
NA12383	SUV39H1	S	0	22	22	1	21	0.00145709	0	0.571099	0
NA12383	TBC1D25	E	1	29	30	1	21	0.00145709	0.0333333	2.35613e-06	0.0330252
NA12383	TCEAL4	E	143	1	144	1	21	0.00145709	0.00694444	0.0421466	0.00553384
NA12383	TIMP1	S	0	206	206	1	21	0.00145709	0	0.708246	0
NA12383	TLR7	E	2	34	36	1	21	0.00145709	0.0555556	8.72703e-18	0.0573692
NA12383	TMSB4X	E	4	69	73	2	21	0.00145709	0.0547945	3.35738e-33	0.0565166
NA12383	TSIX|XIST	E	1	104	105	2	21	0.00145709	0.00952381	0.0151164	0.00815628
NA12383	TXLNG	E	15	104	119	4	21	0.00145709	0.12605	2.23392e-278	0.142802
NA12383	UPF3B	S	0	47	47	1	21	0.00145709	0	0.603295	0
NA12383	VBP1	S	51	0	51	1	21	0.00145709	0	0.607497	0
NA12383	ZBTB33	S	0	43	43	1	21	0.00145709	0	0.598897	0

## Sheet: NA18505
sample	Gene	XCI-status	Reads allele 1	Reads allele 2	Total	Number of SNPs used	Number of training genes	Skewing	Allelic ratio	P-value	Xi-expr
NA18505	ABCB7	S	20	17	37	1	33	0.423799	0.459459	0.341024	0.305467
NA18505	AKAP17A	S	40	37	77	2	33	0.423799	0.480519	0.189669	0.592806
NA18505	ALG13	S	13	11	24	1	33	0.423799	0.458333	0.371744	0.292994
NA18505	APEX2	S	48	47	95	1	33	0.423799	0.494737	0.11738	0.870786
NA18505	ARHGAP4	S	15	30	45	2	33	0.423799	0.333333	0.870772	0
NA18505	ASMTL	S	15	13	28	1	33	0.423799	0.464286	0.340427	0.361764
NA18505	ATP11C	S	36	24	60	2	33	0.423799	0.4	0.631052	0
NA18505	ATP6AP1	S	29	20	49	1	33	0.423799	0.408163	0.580198	0
NA18505	ATP6AP2	E	212	210	422	5	33	0.423799	0.49763	0.0316585	0.939681
NA18505	ATRX	S	31	27	58	2	33	0.423799	0.465517	0.281405	0.376915
NA18505	BRCC3	S	12	21	33	1	33	0.423799	0.363636	0.744554	0
NA18505	CA5BP1	S	14	10	24	1	33	0.423799	0.416667	0.52694	0
NA18505	CCDC22	S	12	18	30	1	33	0.423799	0.4	0.598447	0
NA18505	CDK16	S	39	40	79	1	33	0.423799	0.493671	0.137086	0.846623
NA18505	CENPI	S	8	13	21	1	33	0.423799	0.380952	0.648745	0
NA18505	CSTF2	S	11	24	35	1	33	0.423799	0.314286	0.890281	0
NA18505	CXorf21	S	19	28	47	1	33	0.423799	0.404255	0.598176	0
NA18505	DMD	S	15	7	22	1	33	0.423799	0.318182	0.831925	0
NA18505	DNASE1L1	S	37	39	76	2	33	0.423799	0.486842	0.165458	0.705505
NA18505	EIF2S3	S	13	11	24	1	33	0.423799	0.458333	0.371744	0.292994
NA18505	ELF4	S	71	69	140	2	33	0.423799	0.492857	0.0935999	0.828594
NA18505	ELK1	S	96	57	153	2	33	0.423799	0.372549	0.842853	0
NA18505	FAM122B	S	20	26	46	1	33	0.423799	0.434783	0.444931	0.0776691
NA18505	FAM199X	S	16	33	49	2	33	0.423799	0.326531	0.896009	0
NA18505	FLNA	S	214	386	600	3	33	0.423799	0.356667	0.963104	0
NA18505	FMR1	S	17	15	32	1	33	0.423799	0.46875	0.313979	0.418341
NA18505	G6PD	S	70	95	165	2	33	0.423799	0.424242	0.496445	0.00291971
NA18505	GPKOW	S	25	23	48	1	33	0.423799	0.479167	0.238664	0.5706
NA18505	GRIPAP1	S	32	26	58	1	33	0.423799	0.448276	0.367109	0.191339
NA18505	HAUS7	S	13	21	34	1	33	0.423799	0.382353	0.676845	0
NA18505	HCFC1	S	83	102	185	3	33	0.423799	0.448649	0.30292	0.194821
NA18505	HTATSF1	S	37	20	57	1	33	0.423799	0.350877	0.842408	0
NA18505	HUWE1	S	79	76	155	1	33	0.423799	0.490323	0.0948713	0.774626
NA18505	IDS	S	290	224	514	7	33	0.423799	0.435798	0.377466	0.0854602
NA18505	IGBP1	S	42	52	94	1	33	0.423799	0.446809	0.350511	0.177829
NA18505	IRAK1	S	50	69	119	1	33	0.423799	0.420168	0.526216	0
NA18505	LAMP2	S	25	20	45	1	33	0.423799	0.444444	0.398244	0.156695
NA18505	MAGED1	S	85	58	143	1	33	0.423799	0.405594	0.636834	0
NA18505	MAGED2	S	74	76	150	2	33	0.423799	0.493333	0.0873952	0.839101
NA18505	MAP3K15|PDHA1	S	10	19	29	1	33	0.423799	0.344828	0.792448	0
NA18505	MAP7D3	S	30	40	70	3	33	0.423799	0.428571	0.471573	0.0323287
NA18505	MBNL3	S	19	16	35	1	33	0.423799	0.457143	0.354238	0.280065
NA18505	MECP2	S	19	11	30	1	33	0.423799	0.366667	0.725264	0
NA18505	MED14	S	21	37	58	1	33	0.423799	0.362069	0.80407	0
NA18505	MID1IP1	S	21	7	28	1	33	0.423799	0.25	0.961267	0
NA18505	MST4	S	12	37	49	1	33	0.423799	0.244898	0.989717	0
NA18505	MTMR1	S	24	23	47	1	33	0.423799	0.489362	0.202118	0.75499
NA18505	NDUFA1|RNF113A	S	16	27	43	1	33	0.423799	0.372093	0.736821	0
NA18505	NDUFB11|RBM10	S	29	26	55	1	33	0.423799	0.472727	0.253273	0.472858
NA18505	NSDHL	S	32	43	75	1	33	0.423799	0.426667	0.482449	0.019179
NA18505	OGT	S	84	65	149	2	33	0.423799	0.436242	0.404266	0.0889032
NA18505	OTUD5	S	71	95	166	2	33	0.423799	0.427711	0.468626	0.0263458
NA18505	P2RY8	S	33	21	54	1	33	0.423799	0.388889	0.680959	0
NA18505	PHF6	S	132	108	240	3	33	0.423799	0.45	0.279851	0.207615
NA18505	PHF8	S	17	18	35	1	33	0.423799	0.485714	0.243751	0.684248
NA18505	PIM2	S	14	8	22	1	33	0.423799	0.363636	0.708109	0
NA18505	PLCXD1	S	21	19	40	1	33	0.423799	0.475	0.271487	0.505935
NA18505	PRKX	S	35	73	108	3	33	0.423799	0.324074	0.959733	0
NA18505	RAB9A	S	34	36	70	1	33	0.423799	0.485714	0.177437	0.684248
NA18505	RBBP7|TXLNG	S	12	11	23	1	33	0.423799	0.478261	0.306376	0.556074
NA18505	RBM10	S	43	60	103	1	33	0.423799	0.417476	0.543396	0
NA18505	RBM3	S	246	173	419	2	33	0.423799	0.412888	0.607983	0
NA18505	RP11-1148L6.5	S	13	8	21	1	33	0.423799	0.380952	0.648745	0
NA18505	RP11-706O15.1	S	44	60	104	3	33	0.423799	0.423077	0.50498	0
NA18505	RPS6KA3	S	55	34	89	2	33	0.423799	0.382022	0.75282	0
NA18505	SASH3	S	508	580	1088	5	33	0.423799	0.466912	0.109298	0.394485
NA18505	SEPT6	S	151	137	288	2	33	0.423799	0.475694	0.113736	0.51634
NA18505	SH3KBP1	S	425	246	671	3	33	0.423799	0.366617	0.939021	0
NA18505	SLC25A43	S	5	16	21	1	33	0.423799	0.238095	0.951075	0
NA18505	SLC9A7	S	23	30	53	1	33	0.423799	0.433962	0.44595	0.0714538
NA18505	SNX12	S	33	33	66	1	33	0.423799	0.5	0.1329	1
NA18505	SUV39H1	S	17	6	23	1	33	0.423799	0.26087	0.935012	0
NA18505	SYAP1	S	45	40	85	2	33	0.423799	0.470588	0.225857	0.443028
NA18505	TBC1D25	S	31	27	58	2	33	0.423799	0.465517	0.281405	0.376915
NA18505	TCEAL4	S	95	121	216	2	33	0.423799	0.439815	0.364297	0.117432
NA18505	TCEAL8	S	33	48	81	1	33	0.423799	0.407407	0.602162	0
NA18505	TIMP1	S	101	86	187	1	33	0.423799	0.459893	0.226086	0.310333
NA18505	TLR7	S	35	35	70	1	33	0.423799	0.5	0.127426	1
NA18505	TMSB4X	S	20	22	42	1	33	0.423799	0.47619	0.262522	0.523861
NA18505	TRAPPC2	S	14	35	49	2	33	0.423799	0.285714	0.963072	0
NA18505	TSIX|XIST	S	145	137	282	4	33	0.423799	0.485816	0.0755981	0.686136
NA18505	TSR2	S	45	22	67	1	33	0.423799	0.328358	0.919541	0
NA18505	TXLNG	S	67	67	134	4	33	0.423799	0.5	0.0756277	1
NA18505	UBA1	S	393	319	712	3	33	0.423799	0.448034	0.254451	0.189088
NA18505	UPF3B	S	16	12	28	1	33	0.423799	0.428571	0.480665	0.0323287
NA18505	UPRT	S	27	20	47	2	33	0.423799	0.425532	0.491204	0.0115031
NA18505	WASF4P	S	0	38	38	1	33	0.423799	0	1	0
NA18505	WWC3	S	50	74	124	4	33	0.423799	0.403226	0.6472	0
NA18505	ZBED1	S	23	26	49	2	33	0.423799	0.469388	0.277546	0.426809
NA18505	ZBTB33	S	57	41	98	3	33	0.423799	0.418367	0.536647	0

## Sheet: NA18517
sample	Gene	XCI-status	Reads allele 1	Reads allele 2	Total	Number of SNPs used	Number of training genes	Skewing	Allelic ratio	P-value	Xi-expr
NA18517	ABCB7	S	31	1	32	1	32	0.108848	0.03125	0.877443	0
NA18517	ACOT9	S	59	9	68	1	32	0.108848	0.132353	0.330607	0.0309768
NA18517	AKAP17A	E	28	25	53	1	32	0.108848	0.471698	1.1409e-10	0.865054
NA18517	ARHGAP4	S	9	59	68	1	32	0.108848	0.132353	0.330607	0.0309768
NA18517	ARHGEF6	S	3	30	33	1	32	0.108848	0.0909091	0.606983	0
NA18517	ASMTL	E	11	21	32	1	32	0.108848	0.34375	0.000217015	0.429122
NA18517	ATP6AP1	E	13	48	61	1	32	0.108848	0.213115	0.0292655	0.153778
NA18517	ATP6AP2	S	294	47	341	5	32	0.108848	0.13783	0.244347	0.0384724
NA18517	BTK	S	37	302	339	2	32	0.108848	0.109145	0.497173	0.000379479
NA18517	CCDC22	S	30	0	30	1	32	0.108848	0	0.944661	0
NA18517	CD99L2	E	16	42	58	2	32	0.108848	0.275862	0.00139256	0.27144
NA18517	CETN2	S	12	230	242	3	32	0.108848	0.0495868	0.914907	0
NA18517	CUL4B	E	6	20	26	1	32	0.108848	0.230769	0.0446056	0.184622
NA18517	CXorf40B	S	13	58	71	1	32	0.108848	0.183099	0.0809277	0.104866
NA18517	CYBB	S	123	13	136	3	32	0.108848	0.0955882	0.611931	0
NA18517	DDX26B	S	2	22	24	1	32	0.108848	0.0833333	0.635155	0
NA18517	DKC1	S	21	220	241	2	32	0.108848	0.0871369	0.692265	0
NA18517	EIF1AX	E	15	9	24	1	32	0.108848	0.375	0.000156403	0.515647
NA18517	EIF2S3	E	248	192	440	3	32	0.108848	0.436364	7.99478e-16	0.72015
NA18517	ELF4	S	15	103	118	2	32	0.108848	0.127119	0.351041	0.0239137
NA18517	FAM122B	S	2	34	36	1	32	0.108848	0.0555556	0.796647	0
NA18517	FAM3A	S	5	54	59	1	32	0.108848	0.0847458	0.667677	0
NA18517	FLNA	S	68	652	720	5	32	0.108848	0.0944444	0.640412	0
NA18517	FMR1	S	1	28	29	1	32	0.108848	0.0344828	0.859301	0
NA18517	FTSJ1	S	18	3	21	1	32	0.108848	0.142857	0.330586	0.0454491
NA18517	G6PD	S	20	142	162	2	32	0.108848	0.123457	0.373823	0.0190297
NA18517	GDI1	S	9	64	73	1	32	0.108848	0.123288	0.392104	0.0188052
NA18517	GRIPAP1	E	35	12	47	1	32	0.108848	0.255319	0.00667613	0.230361
NA18517	HAUS7	S	2	49	51	1	32	0.108848	0.0392157	0.885695	0
NA18517	HCFC1	S	13	58	71	2	32	0.108848	0.183099	0.0809277	0.104866
NA18517	HDAC6	E	27	8	35	1	32	0.108848	0.228571	0.0323678	0.180693
NA18517	HDHD1	E	171	159	330	4	32	0.108848	0.481818	3.14857e-19	0.911164
NA18517	HMGN5	S	26	1	27	1	32	0.108848	0.037037	0.844837	0
NA18517	IDH3G	S	15	135	150	1	32	0.108848	0.1	0.576391	0
NA18517	IDS	S	18	184	202	3	32	0.108848	0.0891089	0.672774	0
NA18517	IGBP1	S	44	10	54	1	32	0.108848	0.185185	0.0899761	0.108132
NA18517	IRAK1	S	8	53	61	1	32	0.108848	0.131148	0.342893	0.0293416
NA18517	KDM5C	E	92	74	166	2	32	0.108848	0.445783	4.79975e-14	0.756531
NA18517	LAGE3	S	18	152	170	1	32	0.108848	0.105882	0.526213	0
NA18517	LAMP2	S	21	156	177	5	32	0.108848	0.118644	0.413553	0.0126811
NA18517	MAP7D2	E	17	7	24	1	32	0.108848	0.291667	0.00664527	0.30496
NA18517	MBNL3	S	2	24	26	1	32	0.108848	0.0769231	0.67185	0
NA18517	MSL3	S	6	26	32	1	32	0.108848	0.1875	0.11938	0.111777
NA18517	MST4	S	1	21	22	1	32	0.108848	0.0454545	0.797121	0
NA18517	MTMR1	S	0	21	21	1	32	0.108848	0	0.919658	0
NA18517	NDUFA1|RNF113A	S	11	48	59	1	32	0.108848	0.186441	0.0814151	0.110106
NA18517	PHF6	S	2	22	24	1	32	0.108848	0.0833333	0.635155	0
NA18517	PHF8	S	24	4	28	1	32	0.108848	0.142857	0.31325	0.0454491
NA18517	PIN4	S	44	6	50	1	32	0.108848	0.12	0.423968	0.0144618
NA18517	PIR	S	107	22	129	2	32	0.108848	0.170543	0.0948247	0.0856148
NA18517	PLCXD1	E	51	55	106	3	32	0.108848	0.481132	1.06906e-14	0.907966
NA18517	PRKX	E	19	14	33	1	32	0.108848	0.424242	9.08346e-07	0.675494
NA18517	PRPS2	S	2	24	26	1	32	0.108848	0.0769231	0.67185	0
NA18517	RBBP7|TXLNG	E	13	9	22	1	32	0.108848	0.409091	4.11532e-05	0.622832
NA18517	RBM3	S	397	28	425	2	32	0.108848	0.0658824	0.851541	0
NA18517	RP11-706O15.1	E	16	48	64	2	32	0.108848	0.25	0.00476522	0.220154
NA18517	RP6-105D16.1	S	0	64	64	1	32	0.108848	0	0.977202	0
NA18517	SASH3	S	26	193	219	1	32	0.108848	0.118721	0.410588	0.0127826
NA18517	SEPT6	E	98	113	211	4	32	0.108848	0.464455	2.62339e-16	0.833395
NA18517	SH3BGRL	E	79	42	121	1	32	0.108848	0.347107	2.71855e-07	0.437941
NA18517	SLC10A3	S	3	33	36	1	32	0.108848	0.0833333	0.654403	0
NA18517	SLC25A6	E	103	136	239	1	32	0.108848	0.430962	4.82801e-14	0.69996
NA18517	SNX12	S	55	8	63	1	32	0.108848	0.126984	0.370031	0.0237334
NA18517	TBCAP1	S	97	0	97	1	32	0.108848	0	0.985954	0
NA18517	TMSB4X	S	7	31	38	1	32	0.108848	0.184211	0.116298	0.106604
NA18517	TRAPPC2	E	60	23	83	3	32	0.108848	0.277108	0.000509158	0.274021
NA18517	TSC22D3	E	77	104	181	3	32	0.108848	0.425414	7.25576e-13	0.67971
NA18517	TSIX|XIST	S	5	20	25	1	32	0.108848	0.2	0.105123	0.131884
NA18517	TXLNG	E	16	10	26	1	32	0.108848	0.384615	6.04798e-05	0.544418
NA18517	UBA1	E	179	59	238	1	32	0.108848	0.247899	0.000657548	0.216169
NA18517	UBL4A	S	1	46	47	1	32	0.108848	0.0212766	0.930467	0
NA18517	UPRT	S	23	6	29	1	32	0.108848	0.206897	0.0777682	0.143293
NA18517	USP11	S	50	3	53	1	32	0.108848	0.0566038	0.819379	0
NA18517	WWC3	S	45	4	49	1	32	0.108848	0.0816327	0.679129	0
NA18517	ZBED1	E	18	24	42	1	32	0.108848	0.428571	8.77683e-08	0.691174
NA18517	ZFX	E	14	10	24	1	32	0.108848	0.416667	1.53142e-05	0.648742
NA18517	ZMYM3	S	64	5	69	1	32	0.108848	0.0724638	0.75199	0

[truncated: 207 more sheets: NA18858, NA18861, NA18867, NA18870, NA18907, NA18909, NA18912, NA18916, NA18933, NA19093, NA19102, NA19108, NA19114, NA19116, NA19118, NA19131, NA19137, NA19143, NA19147, NA19149 …]
