# Supplementary material for: Inferring genes that escape X-Chromosome inactivation reveals important contribution of variable escape genes to sex-biased diseases
Source: HighWire-hosted journal article supplement (doi:10.1101/gr.275677.121), 2021-08-23
Supplement: Supplemental_Table_S6.xlsx [file Supplemental_Table_S6.xlsx]

## Sheet: Supplemental_Table_S6
GWAS sex	XCI state	Trait	Heritability	LDSCpvalue	H2prop	Enrichment	F/M ratio
both	E	hypertension	0.0664563	2.83398e-32	0.021	0.644	0.882
both	Intergenic	hypertension	0.158369	9.97502e-241	0.05	0.202	0.882
both	NoCall	hypertension	1.16746	0	0.368	0.743	0.882
both	S	hypertension	1.56755	0	0.494	3.104	0.882
both	VE	hypertension	0.202013	2.83889e-96	0.064	1.785	0.882
both	Yhomolog	hypertension	0.0117392	0.0260969	0.004	0.122	0.882
both	E	heart/cardiac problem	0.0488358	2.67097e-53	0.194	5.957	0.943
both	Intergenic	heart/cardiac problem	0.00783729	4.92176e-29	0.031	0.126	0.943
both	NoCall	heart/cardiac problem	0.00171589	0.00174333	0.007	0.014	0.943
both	S	heart/cardiac problem	0.0631608	4.14817e-123	0.251	1.574	0.943
both	VE	heart/cardiac problem	0.0137921	1.58738e-16	0.055	1.534	0.943
both	Yhomolog	heart/cardiac problem	0.116767	2.02914e-26	0.463	15.227	0.943
both	E	peripheral vascular disease	0.00286127	8.10371e-05	0.015	0.464	1.645
both	Intergenic	peripheral vascular disease	0.00795987	7.44371e-33	0.042	0.17	1.645
both	NoCall	peripheral vascular disease	0.00811274	5.55173e-13	0.043	0.086	1.645
both	S	peripheral vascular disease	0	0.672572	0	0	1.645
both	VE	peripheral vascular disease	0.0731541	4.89067e-90	0.386	10.816	1.645
both	Yhomolog	peripheral vascular disease	0.0976151	6.94561e-25	0.515	16.917	1.645
both	E	essential hypertension	0.0348515	7.56588e-38	0.064	1.966	0.985
both	Intergenic	essential hypertension	0.133456	0	0.245	0.99	0.985
both	NoCall	essential hypertension	0.119357	2.56374e-147	0.219	0.442	0.985
both	S	essential hypertension	0.0888111	5.37027e-169	0.163	1.024	0.985
both	VE	essential hypertension	0.00177305	0.00339074	0.003	0.091	0.985
both	Yhomolog	essential hypertension	0.167022	2.14524e-36	0.306	10.07	0.985
both	E	angina	0.0191431	2.93966e-15	0.253	7.773	0.465
both	Intergenic	angina	0.0357779	1.72354e-85	0.472	1.91	0.465
both	NoCall	angina	0.00763983	6.00872e-08	0.101	0.204	0.465
both	S	angina	0.00369718	2.79983e-06	0.049	0.307	0.465
both	VE	angina	0.0094789	2.02437e-08	0.125	3.51	0.465
both	Yhomolog	angina	0	0.808985	0	0	0.465
both	E	heart attack/myocardial infarction	0	0.0845584	0	0	0.23
both	Intergenic	heart attack/myocardial infarction	0.0224443	6.69596e-42	0.026	0.104	0.23
both	NoCall	heart attack/myocardial infarction	0.548583	0	0.627	1.268	0.23
both	S	heart attack/myocardial infarction	0.085484	3.40817e-86	0.098	0.614	0.23
both	VE	heart attack/myocardial infarction	0.0358305	1.58407e-21	0.041	1.149	0.23
both	Yhomolog	heart attack/myocardial infarction	0.182054	1.7679e-21	0.208	6.845	0.23
both	E	heart failure/pulmonary odema	0.0296308	1.7495e-30	0.11	3.394	0.608
both	Intergenic	heart failure/pulmonary odema	0.107886	0	0.402	1.624	0.608
both	NoCall	heart failure/pulmonary odema	0	0.950595	0	0	0.608
both	S	heart failure/pulmonary odema	0	0.0639802	0	0	0.608
both	VE	heart failure/pulmonary odema	0.00235	0.0010974	0.009	0.245	0.608
both	Yhomolog	heart failure/pulmonary odema	0.128646	1.00825e-26	0.479	15.751	0.608
both	E	heart arrhythmia	0.020436	2.19112e-22	0.039	1.193	0.983
both	Intergenic	heart arrhythmia	0.0591213	2.50301e-198	0.112	0.454	0.983
both	NoCall	heart arrhythmia	0.296428	0	0.563	1.137	0.983
both	S	heart arrhythmia	0.114366	6.14985e-212	0.217	1.364	0.983
both	VE	heart arrhythmia	0.00113835	0.0203366	0.002	0.061	0.983
both	Yhomolog	heart arrhythmia	0.0353584	1.00804e-08	0.067	2.206	0.983
both	E	heart valve problem/heart murmur	0.0736879	1.14872e-90	0.272	8.369	1.526
both	Intergenic	heart valve problem/heart murmur	0.0214854	2.75695e-87	0.079	0.321	1.526
both	NoCall	heart valve problem/heart murmur	0.0271185	1.94837e-40	0.1	0.202	1.526
both	S	heart valve problem/heart murmur	0.0271534	1.46048e-61	0.1	0.63	1.526
both	VE	heart valve problem/heart murmur	0.020212	1.21893e-26	0.075	2.093	1.526
both	Yhomolog	heart valve problem/heart murmur	0.101125	3.36935e-26	0.373	12.278	1.526
both	E	cardiomyopathy	0.0227379	3.95614e-19	0.17	5.231	0.489
both	Intergenic	cardiomyopathy	0.0097626	1.99752e-26	0.073	0.295	0.489
both	NoCall	cardiomyopathy	0	0.217879	0	0	0.489
both	S	cardiomyopathy	0.0102815	4.77172e-16	0.077	0.483	0.489
both	VE	cardiomyopathy	0.0327965	2.19531e-27	0.245	6.88	0.489
both	Yhomolog	cardiomyopathy	0.0581118	1.60687e-10	0.435	14.29	0.489
both	E	pericardial problem	0.00677493	1.21799e-06	0.089	2.735	0.45
both	Intergenic	pericardial problem	0.00806784	6.73251e-22	0.106	0.428	0.45
both	NoCall	pericardial problem	0.000943055	0.049147	0.012	0.025	0.45
both	S	pericardial problem	0.0516501	3.79831e-73	0.678	4.26	0.45
both	VE	pericardial problem	0.00148897	0.0215816	0.02	0.548	0.45
both	Yhomolog	pericardial problem	0.00726551	0.0245155	0.095	3.135	0.45
both	E	stroke	0.678585	0	0.877	26.964	0.652
both	Intergenic	stroke	0.0602729	9.17969e-189	0.078	0.315	0.652
both	NoCall	stroke	0.00885886	1.74573e-11	0.011	0.023	0.652
both	S	stroke	0	0.562134	0	0	0.652
both	VE	stroke	0.0262416	5.38849e-27	0.034	0.951	0.652
both	Yhomolog	stroke	0	0.822392	0	0	0.652
both	E	transient ischaemic attack (tia)	0.0261845	4.99277e-24	0.045	1.398	0.764
both	Intergenic	transient ischaemic attack (tia)	0.0858333	6.13047e-242	0.149	0.602	0.764
both	NoCall	transient ischaemic attack (tia)	0.336565	0	0.584	1.18	0.764
both	S	transient ischaemic attack (tia)	0.0148419	8.72969e-25	0.026	0.162	0.764
both	VE	transient ischaemic attack (tia)	0.00501608	7.84604e-06	0.009	0.244	0.764
both	Yhomolog	transient ischaemic attack (tia)	0.107768	4.35864e-20	0.187	6.149	0.764
both	E	subdural haemorrhage/haematoma	0.0668057	1.58434e-67	0.352	10.814	0.589
both	Intergenic	subdural haemorrhage/haematoma	0.000291073	0.0373294	0.002	0.006	0.589
both	NoCall	subdural haemorrhage/haematoma	0.0159864	2.68975e-20	0.084	0.17	0.589
both	S	subdural haemorrhage/haematoma	0.0138642	1.21271e-26	0.073	0.459	0.589
both	VE	subdural haemorrhage/haematoma	0.00341428	7.33183e-05	0.018	0.504	0.589
both	Yhomolog	subdural haemorrhage/haematoma	0.0896278	2.2231e-19	0.472	15.509	0.589
both	E	subarachnoid haemorrhage	0.0120661	1.32042e-15	0.047	1.447	1.213
both	Intergenic	subarachnoid haemorrhage	0.0243298	2.34218e-94	0.095	0.384	1.213
both	NoCall	subarachnoid haemorrhage	0.00389156	8.12484e-07	0.015	0.031	1.213
both	S	subarachnoid haemorrhage	0.0032492	2.12471e-08	0.013	0.08	1.213
both	VE	subarachnoid haemorrhage	0.0350804	4.28398e-43	0.137	3.837	1.213
both	Yhomolog	subarachnoid haemorrhage	0.177801	6.80839e-43	0.693	22.796	1.213
both	E	leg claudication/ intermittent claudication	0.0136885	2.34237e-12	0.032	0.986	0.456
both	Intergenic	leg claudication/ intermittent claudication	0.0542665	9.83416e-142	0.127	0.514	0.456
both	NoCall	leg claudication/ intermittent claudication	0.220169	8.95821e-205	0.516	1.042	0.456
both	S	leg claudication/ intermittent claudication	0.00299972	9.2755e-06	0.007	0.044	0.456
both	VE	leg claudication/ intermittent claudication	0	0.447885	0	0	0.456
both	Yhomolog	leg claudication/ intermittent claudication	0.135781	4.92084e-23	0.318	10.456	0.456
both	E	pulmonary embolism +/- dvt	0.0182554	5.78991e-23	0.186	5.714	1.177
both	Intergenic	pulmonary embolism +/- dvt	0.00059807	0.00117852	0.006	0.025	1.177
both	NoCall	pulmonary embolism +/- dvt	0.0203739	9.74633e-30	0.207	0.419	1.177
both	S	pulmonary embolism +/- dvt	0	0.0632076	0	0	1.177
both	VE	pulmonary embolism +/- dvt	0.0127192	8.92719e-17	0.129	3.631	1.177
both	Yhomolog	pulmonary embolism +/- dvt	0.0463032	2.02607e-12	0.471	15.494	1.177
both	E	deep venous thrombosis (dvt)	0.0139611	1.09554e-16	0.105	3.226	1.387
both	Intergenic	deep venous thrombosis (dvt)	0.000998714	5.59403e-05	0.008	0.03	1.387
both	NoCall	deep venous thrombosis (dvt)	0.00620751	1.86058e-09	0.047	0.094	1.387
both	S	deep venous thrombosis (dvt)	0.0243085	2.02622e-49	0.183	1.148	1.387
both	VE	deep venous thrombosis (dvt)	0.0571239	2.25349e-64	0.429	12.039	1.387
both	Yhomolog	deep venous thrombosis (dvt)	0.0304783	4.15098e-08	0.229	7.529	1.387
both	E	asthma	0.0790434	7.05722e-56	0.041	1.25	1.325
both	Intergenic	asthma	0.0332777	7.04268e-77	0.017	0.069	1.325
both	NoCall	asthma	0.159865	9.81726e-131	0.082	0.166	1.325
both	S	asthma	0.44181	0	0.227	1.428	1.325
both	VE	asthma	0.0220846	4.154e-17	0.011	0.318	1.325
both	Yhomolog	asthma	1.20875	4.7255e-167	0.622	20.433	1.325
both	E	chronic obstructive airways disease/copd	0.00439464	2.21481e-06	0.02	0.625	1.014
both	Intergenic	chronic obstructive airways disease/copd	0.0236873	1.48086e-88	0.11	0.443	1.014
both	NoCall	chronic obstructive airways disease/copd	0.023738	6.43024e-33	0.11	0.222	1.014
both	S	chronic obstructive airways disease/copd	0.106521	5.5299e-217	0.493	3.096	1.014
both	VE	chronic obstructive airways disease/copd	0.00256069	0.000263553	0.012	0.332	1.014
both	Yhomolog	chronic obstructive airways disease/copd	0.0552926	5.80139e-14	0.256	8.408	1.014
both	E	emphysema/chronic bronchitis	0	0.840158	0	0	0.904
both	Intergenic	emphysema/chronic bronchitis	0.0632753	3.20617e-224	0.492	1.99	0.904
both	NoCall	emphysema/chronic bronchitis	0.0074203	5.58296e-11	0.058	0.117	0.904
both	S	emphysema/chronic bronchitis	0.0133769	7.65092e-28	0.104	0.654	0.904
both	VE	emphysema/chronic bronchitis	0.0338365	1.10209e-38	0.263	7.382	0.904
both	Yhomolog	emphysema/chronic bronchitis	0.0106446	0.00122363	0.083	2.722	0.904
both	E	bronchiectasis	0.01223	2.50767e-18	0.071	2.19	1.806
both	Intergenic	bronchiectasis	0.0108618	1.70082e-50	0.063	0.256	1.806
both	NoCall	bronchiectasis	0.00793447	2.1345e-14	0.046	0.093	1.806
both	S	bronchiectasis	0.0317121	2.3098e-80	0.185	1.16	1.806
both	VE	bronchiectasis	0.0859062	1.0209e-120	0.5	14.029	1.806
both	Yhomolog	bronchiectasis	0.0230948	7.87431e-08	0.134	4.421	1.806
both	E	interstitial lung disease	0.0526823	6.09354e-39	0.023	0.712	0.316
both	Intergenic	interstitial lung disease	0.0660791	3.34888e-155	0.029	0.117	0.316
both	NoCall	interstitial lung disease	0.108464	4.92986e-92	0.048	0.096	0.316
both	S	interstitial lung disease	0	0.249209	0	0	0.316
both	VE	interstitial lung disease	0.102875	9.15618e-76	0.045	1.267	0.316
both	Yhomolog	interstitial lung disease	1.94655	1.23265e-275	0.855	28.109	0.316
both	E	other respiratory problems	0.00163054	0.00538584	0.004	0.111	1.011
both	Intergenic	other respiratory problems	0.0314866	3.20624e-109	0.069	0.281	1.011
both	NoCall	other respiratory problems	0.155122	6.40367e-191	0.342	0.691	1.011
both	S	other respiratory problems	0.00856013	7.23543e-18	0.019	0.119	1.011
both	VE	other respiratory problems	0.0804524	1.04264e-86	0.177	4.977	1.011
both	Yhomolog	other respiratory problems	0.176079	2.66008e-38	0.388	12.769	1.011
both	E	asbestosis	0	0.236904	0	0	0.019
both	Intergenic	asbestosis	0.149442	1.46271e-290	0.308	1.246	0.019
both	NoCall	asbestosis	0.0419969	6.17456e-31	0.087	0.175	0.019
both	S	asbestosis	0.146625	9.7261e-159	0.302	1.901	0.019
both	VE	asbestosis	0.013408	1.24425e-09	0.028	0.776	0.019
both	Yhomolog	asbestosis	0.13335	2.09969e-17	0.275	9.042	0.019
both	E	sleep apnoea	0.0355317	2.68011e-25	0.07	2.14	0.307
both	Intergenic	sleep apnoea	0.0805493	1.84603e-177	0.158	0.638	0.307
both	NoCall	sleep apnoea	0.0121309	4.14983e-11	0.024	0.048	0.307
both	S	sleep apnoea	0.0173685	9.90845e-23	0.034	0.214	0.307
both	VE	sleep apnoea	0.0318997	2.64495e-23	0.062	1.752	0.307
both	Yhomolog	sleep apnoea	0.333049	5.33745e-46	0.652	21.447	0.307
both	E	pleurisy	0	0.480684	0	0	1.174
both	Intergenic	pleurisy	0.0506281	7.66899e-186	0.119	0.48	1.174
both	NoCall	pleurisy	0.00821769	2.34281e-12	0.019	0.039	1.174
both	S	pleurisy	0.0806662	5.6025e-164	0.189	1.189	1.174
both	VE	pleurisy	0.012499	9.1153e-16	0.029	0.822	1.174
both	Yhomolog	pleurisy	0.274202	1.85013e-62	0.643	21.15	1.174
both	E	spontaneous pneumothorax/recurrent pneumothorax	0.0386068	1.25473e-30	0.088	2.718	0.351
both	Intergenic	spontaneous pneumothorax/recurrent pneumothorax	0.00470182	3.04083e-13	0.011	0.044	0.351
both	NoCall	spontaneous pneumothorax/recurrent pneumothorax	0.336691	1.1222e-297	0.771	1.557	0.351
both	S	spontaneous pneumothorax/recurrent pneumothorax	0	0.85166	0	0	0.351
both	VE	spontaneous pneumothorax/recurrent pneumothorax	0.0011043	0.0493808	0.003	0.071	0.351
both	Yhomolog	spontaneous pneumothorax/recurrent pneumothorax	0.0557003	6.23046e-10	0.128	4.192	0.351
both	E	oesophageal disorder	0.0392217	8.59968e-48	0.311	9.553	1.031
both	Intergenic	oesophageal disorder	0.00085433	9.86456e-05	0.007	0.027	1.031
both	NoCall	oesophageal disorder	0.0661549	2.55488e-93	0.524	1.059	1.031
both	S	oesophageal disorder	0.017818	6.68039e-40	0.141	0.887	1.031
both	VE	oesophageal disorder	0.00221878	0.000484178	0.018	0.493	1.031
both	Yhomolog	oesophageal disorder	0	0.924958	0	0	1.031
both	E	stomach disorder	0.0714827	3.84716e-72	0.406	12.5	0.951
both	Intergenic	stomach disorder	0.00227959	5.62384e-09	0.013	0.052	0.951
both	NoCall	stomach disorder	0.0309891	8.30974e-38	0.176	0.356	0.951
both	S	stomach disorder	0.0411541	1.1768e-75	0.234	1.471	0.951
both	VE	stomach disorder	0	0.619099	0	0	0.951
both	Yhomolog	stomach disorder	0.0299584	1.93714e-07	0.17	5.6	0.951
both	E	liver/biliary/pancreas problem	0	0.900469	0	0	1.122
both	Intergenic	liver/biliary/pancreas problem	0.180479	0	0.406	1.641	1.122
both	NoCall	liver/biliary/pancreas problem	0.0805395	5.45113e-90	0.181	0.366	1.122
both	S	liver/biliary/pancreas problem	0.00342267	2.52931e-07	0.008	0.048	1.122
both	VE	liver/biliary/pancreas problem	0.141493	1.60676e-135	0.318	8.927	1.122
both	Yhomolog	liver/biliary/pancreas problem	0.0386188	9.55094e-09	0.087	2.856	1.122
both	E	other abdominal problem	0.00100914	0.0236901	0.004	0.133	1.354
both	Intergenic	other abdominal problem	0.000362638	0.0137779	0.002	0.006	1.354
both	NoCall	other abdominal problem	0.117665	4.91435e-155	0.504	1.019	1.354
both	S	other abdominal problem	0.0797857	2.75742e-162	0.342	2.149	1.354
both	VE	other abdominal problem	0.000878862	0.0329997	0.004	0.106	1.354
both	Yhomolog	other abdominal problem	0.0335954	5.1925e-09	0.144	4.734	1.354
both	E	gastro-oesophageal reflux (gord) / gastric reflux	0.0277612	1.40234e-29	0.159	4.899	1.06
both	Intergenic	gastro-oesophageal reflux (gord) / gastric reflux	0.0201568	2.14533e-68	0.116	0.468	1.06
both	NoCall	gastro-oesophageal reflux (gord) / gastric reflux	0.0878994	1.19285e-105	0.504	1.019	1.06
both	S	gastro-oesophageal reflux (gord) / gastric reflux	0.00507452	6.95077e-11	0.029	0.183	1.06
both	VE	gastro-oesophageal reflux (gord) / gastric reflux	0.0333836	6.73331e-36	0.192	5.373	1.06
both	Yhomolog	gastro-oesophageal reflux (gord) / gastric reflux	0	0.491144	0	0	1.06
both	E	oesophagitis/barretts oesophagus	0.000919232	0.0488061	0.002	0.048	0.755
both	Intergenic	oesophagitis/barretts oesophagus	0.00187437	3.22119e-07	0.003	0.013	0.755
both	NoCall	oesophagitis/barretts oesophagus	0.30339	0	0.515	1.04	0.755
both	S	oesophagitis/barretts oesophagus	0.183967	0	0.312	1.962	0.755
both	VE	oesophagitis/barretts oesophagus	0.0228771	3.20126e-23	0.039	1.089	0.755
both	Yhomolog	oesophagitis/barretts oesophagus	0.0761495	1.01662e-15	0.129	4.249	0.755
both	E	gastric/stomach ulcers	0.0740306	2.48635e-75	0.145	4.452	0.724
both	Intergenic	gastric/stomach ulcers	0.0146441	8.38573e-50	0.029	0.116	0.724
both	NoCall	gastric/stomach ulcers	0.02999	5.66587e-37	0.059	0.118	0.724
both	S	gastric/stomach ulcers	0.250545	0	0.49	3.079	0.724
both	VE	gastric/stomach ulcers	0.0153746	2.79584e-17	0.03	0.843	0.724
both	Yhomolog	gastric/stomach ulcers	0.126836	5.32024e-27	0.248	8.153	0.724
both	E	gastritis/gastric erosions	0.00202699	0.00101684	0.008	0.254	1.297
both	Intergenic	gastritis/gastric erosions	0.00990274	1.0108e-39	0.04	0.163	1.297
both	NoCall	gastritis/gastric erosions	0.0605102	1.07427e-84	0.246	0.497	1.297
both	S	gastritis/gastric erosions	0.00896018	1.06661e-20	0.036	0.229	1.297
both	VE	gastritis/gastric erosions	0.158588	4.11494e-189	0.645	18.098	1.297
both	Yhomolog	gastritis/gastric erosions	0.00577503	0.0130635	0.023	0.773	1.297
both	E	irritable bowel syndrome	0.0622846	1.54946e-88	0.146	4.481	2.725
both	Intergenic	irritable bowel syndrome	0.00335741	3.94301e-17	0.008	0.032	2.725
both	NoCall	irritable bowel syndrome	0.0788651	2.37263e-131	0.185	0.373	2.725
both	S	irritable bowel syndrome	0.03385	8.90751e-88	0.079	0.498	2.725
both	VE	irritable bowel syndrome	0.0227672	3.80784e-34	0.053	1.494	2.725
both	Yhomolog	irritable bowel syndrome	0.226326	5.93537e-65	0.529	17.407	2.725
both	E	hepatitis	0	0.135066	0	0	0.882
both	Intergenic	hepatitis	0.0425936	3.87502e-131	0.453	1.831	0.882
both	NoCall	hepatitis	0.0354067	2.4607e-40	0.376	0.761	0.882
both	S	hepatitis	0.00290696	2.185e-06	0.031	0.194	0.882
both	VE	hepatitis	0.00798954	4.33196e-09	0.085	2.383	0.882
both	Yhomolog	hepatitis	0.00514759	0.0367808	0.055	1.799	0.882
both	E	infective/viral hepatitis	0	0.918663	0	0	0.855
both	Intergenic	infective/viral hepatitis	0.00136696	1.03572e-05	0.019	0.077	0.855
both	NoCall	infective/viral hepatitis	0.0276431	1.87233e-32	0.386	0.78	0.855
both	S	infective/viral hepatitis	0.0315214	7.86895e-56	0.44	2.766	0.855
both	VE	infective/viral hepatitis	0.00264473	0.000648246	0.037	1.036	0.855
both	Yhomolog	infective/viral hepatitis	0.0084524	0.00689886	0.118	3.879	0.855
both	E	non-infective hepatitis	0.0255225	1.00513e-28	0.058	1.782	1.23
both	Intergenic	non-infective hepatitis	0.011115	1.59557e-40	0.025	0.102	1.23
both	NoCall	non-infective hepatitis	0.00165232	0.00210763	0.004	0.008	1.23
both	S	non-infective hepatitis	0.399488	0	0.907	5.699	1.23
both	VE	non-infective hepatitis	0.00273409	0.000236823	0.006	0.174	1.23
both	Yhomolog	non-infective hepatitis	0	0.079132	0	0	1.23
both	E	liver failure/cirrhosis	0.0324312	7.87334e-32	0.038	1.178	0.922
both	Intergenic	liver failure/cirrhosis	0	0.108904	0	0	0.922
both	NoCall	liver failure/cirrhosis	0.0346536	1.04331e-39	0.041	0.083	0.922
both	S	liver failure/cirrhosis	0.0480552	5.67206e-83	0.057	0.357	0.922
both	VE	liver failure/cirrhosis	0.417585	0	0.493	13.838	0.922
both	Yhomolog	liver failure/cirrhosis	0.313624	5.35222e-60	0.371	12.182	0.922
both	E	gall bladder disease	0.116618	2.77468e-143	0.125	3.843	2.129
both	Intergenic	gall bladder disease	0.00546856	1.13501e-23	0.006	0.024	2.129
both	NoCall	gall bladder disease	0	0.166935	0	0	2.129
both	S	gall bladder disease	0.0276269	4.91601e-63	0.03	0.186	2.129
both	VE	gall bladder disease	0.774458	0	0.83	23.276	2.129
both	Yhomolog	gall bladder disease	0.0090133	0.00151044	0.01	0.318	2.129
both	E	cholelithiasis/gall stones	0.076106	3.51687e-127	0.496	15.263	3.314
both	Intergenic	cholelithiasis/gall stones	0.000371608	0.00231678	0.002	0.01	3.314
both	NoCall	cholelithiasis/gall stones	0.0298655	5.64447e-60	0.195	0.393	3.314
both	S	cholelithiasis/gall stones	0.000644862	0.00284679	0.004	0.026	3.314
both	VE	cholelithiasis/gall stones	0.0100803	1.1264e-18	0.066	1.844	3.314
both	Yhomolog	cholelithiasis/gall stones	0.0362785	1.20883e-13	0.237	7.778	3.314
both	E	cholecystitis	0.121994	1.02165e-198	0.202	6.204	2.611
both	Intergenic	cholecystitis	0	0.114873	0	0	2.611
both	NoCall	cholecystitis	0.315066	0	0.521	1.053	2.611
both	S	cholecystitis	0.0205795	1.51388e-62	0.034	0.214	2.611
both	VE	cholecystitis	0.0138544	1.26745e-24	0.023	0.643	2.611
both	Yhomolog	cholecystitis	0.133228	5.48734e-45	0.22	7.243	2.611
both	E	pancreatitis	0	0.329715	0	0	0.948
both	Intergenic	pancreatitis	0.0767787	2.17619e-254	0.222	0.896	0.948
both	NoCall	pancreatitis	0.267013	0	0.771	1.557	0.948
both	S	pancreatitis	0.00139273	0.000637448	0.004	0.025	0.948
both	VE	pancreatitis	0.00126307	0.0150073	0.004	0.102	0.948
both	Yhomolog	pancreatitis	0	0.675627	0	0	0.948
both	E	peritonitis	0	0.434368	0	0	1.03
both	Intergenic	peritonitis	0.0213587	5.97147e-64	0.452	1.826	1.03
both	NoCall	peritonitis	0.00136187	0.010739	0.029	0.058	1.03
both	S	peritonitis	0.0245817	2.39199e-41	0.52	3.266	1.03
both	VE	peritonitis	0	0.253798	0	0	1.03
both	Yhomolog	peritonitis	0	0.080684	0	0	1.03
both	E	gastrointestinal bleeding	0.0196889	2.26578e-19	0.077	2.375	0.676
both	Intergenic	gastrointestinal bleeding	0.0245142	2.70845e-74	0.096	0.389	0.676
both	NoCall	gastrointestinal bleeding	0.119335	5.91276e-128	0.468	0.946	0.676
both	S	gastrointestinal bleeding	0.0285099	1.98494e-48	0.112	0.703	0.676
both	VE	gastrointestinal bleeding	0.0435938	1.1363e-41	0.171	4.796	0.676
both	Yhomolog	gastrointestinal bleeding	0.0193183	6.61812e-05	0.076	2.491	0.676
both	E	renal/kidney failure	0.0369736	2.29767e-37	0.12	3.681	0.927
both	Intergenic	renal/kidney failure	0.0164343	5.78857e-54	0.053	0.215	0.927
both	NoCall	renal/kidney failure	0.0315196	1.34516e-37	0.102	0.206	0.927
both	S	renal/kidney failure	0.0140774	1.83755e-26	0.046	0.286	0.927
both	VE	renal/kidney failure	0.019764	3.99029e-21	0.064	1.794	0.927
both	Yhomolog	renal/kidney failure	0.190137	1.97672e-38	0.616	20.236	0.927
both	E	renal failure requiring dialysis	0.0296883	9.08212e-25	0.252	7.737	0.559
both	Intergenic	renal failure requiring dialysis	0.0284133	1.8977e-74	0.241	0.973	0.559
both	NoCall	renal failure requiring dialysis	0.00549647	1.55091e-06	0.047	0.094	0.559
both	S	renal failure requiring dialysis	0.00162288	0.00117531	0.014	0.086	0.559
both	VE	renal failure requiring dialysis	0.0527888	1.51566e-43	0.447	12.546	0.559
both	Yhomolog	renal failure requiring dialysis	0	0.167147	0	0	0.559
both	E	renal failure not requiring dialysis	0	0.251074	0	0	0.88
both	Intergenic	renal failure not requiring dialysis	0.0116977	1.86071e-44	0.076	0.308	0.88
both	NoCall	renal failure not requiring dialysis	0.00893693	2.57345e-13	0.058	0.118	0.88
both	S	renal failure not requiring dialysis	0.0622752	3.6397e-127	0.406	2.551	0.88
both	VE	renal failure not requiring dialysis	0.0029881	8.43805e-05	0.019	0.546	0.88
both	Yhomolog	renal failure not requiring dialysis	0.0675232	1.22116e-16	0.44	14.469	0.88
both	E	urinary tract infection/kidney infection	0.030367	3.77843e-39	0.181	5.581	2.177
both	Intergenic	urinary tract infection/kidney infection	0.00328688	5.17764e-15	0.02	0.079	2.177
both	NoCall	urinary tract infection/kidney infection	0.00304827	6.57869e-06	0.018	0.037	2.177
both	S	urinary tract infection/kidney infection	0.0395868	1.48841e-90	0.237	1.487	2.177
both	VE	urinary tract infection/kidney infection	0.0128846	7.18459e-18	0.077	2.16	2.177
both	Yhomolog	urinary tract infection/kidney infection	0.0781622	5.52847e-21	0.467	15.356	2.177
both	E	kidney stone/ureter stone/bladder stone	0.00187966	0.0051835	0.013	0.391	0.417
both	Intergenic	kidney stone/ureter stone/bladder stone	0	0.367538	0	0	0.417
both	NoCall	kidney stone/ureter stone/bladder stone	0.000988267	0.0276319	0.007	0.013	0.417
both	S	kidney stone/ureter stone/bladder stone	0.11758	1.3581e-195	0.795	4.996	0.417
both	VE	kidney stone/ureter stone/bladder stone	0.00834187	2.72361e-09	0.056	1.582	0.417
both	Yhomolog	kidney stone/ureter stone/bladder stone	0.0191174	6.61939e-05	0.129	4.249	0.417
both	E	ureteric obstruction/hydronephrosis	0.00681097	1.03124e-06	0.026	0.788	0.541
both	Intergenic	ureteric obstruction/hydronephrosis	0.0471469	1.90891e-120	0.177	0.717	0.541
both	NoCall	ureteric obstruction/hydronephrosis	0	0.126709	0	0	0.541
both	S	ureteric obstruction/hydronephrosis	0.0162248	2.36619e-24	0.061	0.384	0.541
both	VE	ureteric obstruction/hydronephrosis	0.0366434	2.52353e-30	0.138	3.866	0.541
both	Yhomolog	ureteric obstruction/hydronephrosis	0.159043	4.35717e-26	0.598	19.666	0.541
both	E	bladder problem (not cancer)	0.00084997	0.0185359	0.004	0.125	1.967
both	Intergenic	bladder problem (not cancer)	0.00809045	9.59995e-40	0.039	0.157	1.967
both	NoCall	bladder problem (not cancer)	0.049262	1.87965e-84	0.236	0.477	1.967
both	S	bladder problem (not cancer)	0.0497193	1.5555e-130	0.238	1.498	1.967
both	VE	bladder problem (not cancer)	0.00231271	8.75094e-05	0.011	0.311	1.967
both	Yhomolog	bladder problem (not cancer)	0.0983467	8.90426e-30	0.472	15.501	1.967
both	E	urinary frequency / incontinence	0.0195316	4.17738e-26	0.11	3.369	1.504
both	Intergenic	urinary frequency / incontinence	0.0341032	8.42062e-142	0.191	0.773	1.504
both	NoCall	urinary frequency / incontinence	0.00330041	2.34811e-06	0.019	0.037	1.504
both	S	urinary frequency / incontinence	0	0.438213	0	0	1.504
both	VE	urinary frequency / incontinence	0.0866942	6.58246e-112	0.486	13.639	1.504
both	Yhomolog	urinary frequency / incontinence	0.034644	2.99053e-10	0.194	6.389	1.504
both	E	diabetes	0.00650453	0.000422612	0.001	0.02	0.578
both	Intergenic	diabetes	0.0595868	1.25315e-83	0.006	0.024	0.578
both	NoCall	diabetes	2.20387	0	0.215	0.435	0.578
both	S	diabetes	7.88389	0	0.77	4.838	0.578
both	VE	diabetes	0.00200301	0.0481649	0	0.005	0.578
both	Yhomolog	diabetes	0.0846539	1.25761e-08	0.008	0.272	0.578
both	E	type 1 diabetes	0.00122519	0.0197906	0.003	0.086	0.994
both	Intergenic	type 1 diabetes	0.0525113	9.0598e-169	0.12	0.486	0.994
both	NoCall	type 1 diabetes	0.164218	1.28125e-188	0.376	0.76	0.994
both	S	type 1 diabetes	0.0481174	1.58459e-86	0.11	0.692	0.994
both	VE	type 1 diabetes	0.027591	5.88929e-29	0.063	1.772	0.994
both	Yhomolog	type 1 diabetes	0.143143	1.82756e-29	0.328	10.774	0.994
both	E	type 2 diabetes	0	0.958106	0	0	0.616
both	Intergenic	type 2 diabetes	0.103418	0	0.823	3.326	0.616
both	NoCall	type 2 diabetes	0.00124054	0.0106598	0.01	0.02	0.616
both	S	type 2 diabetes	0.0210447	4.84901e-39	0.167	1.052	0.616
both	VE	type 2 diabetes	0	0.573541	0	0	0.616
both	Yhomolog	type 2 diabetes	0	0.11011	0	0	0.616
both	E	thyroid problem (not cancer)	0.032589	4.523e-57	0.16	4.909	5.105
both	Intergenic	thyroid problem (not cancer)	0.107958	0	0.529	2.138	5.105
both	NoCall	thyroid problem (not cancer)	0.00855329	7.70644e-19	0.042	0.085	5.105
both	S	thyroid problem (not cancer)	0.0138615	1.11685e-44	0.068	0.427	5.105
both	VE	thyroid problem (not cancer)	0.0131308	1.82403e-24	0.064	1.804	5.105
both	Yhomolog	thyroid problem (not cancer)	0.0280724	3.73928e-11	0.137	4.52	5.105
both	E	hyperthyroidism/thyrotoxicosis	0.216308	0	0.383	11.772	4.173
both	Intergenic	hyperthyroidism/thyrotoxicosis	0.00622942	1.06732e-31	0.011	0.045	4.173
both	NoCall	hyperthyroidism/thyrotoxicosis	0.0410482	2.43371e-72	0.073	0.147	4.173
both	S	hyperthyroidism/thyrotoxicosis	0.022102	1.74185e-60	0.039	0.246	4.173
both	VE	hyperthyroidism/thyrotoxicosis	0.235182	0	0.416	11.673	4.173
both	Yhomolog	hyperthyroidism/thyrotoxicosis	0.044196	1.48431e-14	0.078	2.571	4.173
both	E	hypothyroidism/myxoedema	0.851258	0	0.165	5.072	5.356
both	Intergenic	hypothyroidism/myxoedema	0	0.17888	0	0	5.356
both	NoCall	hypothyroidism/myxoedema	0.00208403	0.00488125	0	0.001	5.356
both	S	hypothyroidism/myxoedema	0.851028	0	0.165	1.036	5.356
both	VE	hypothyroidism/myxoedema	3.39571	0	0.658	18.453	5.356
both	Yhomolog	hypothyroidism/myxoedema	0.0610928	3.46314e-10	0.012	0.389	5.356
both	E	parathyroid gland problem (not cancer)	0.0515491	1.83751e-82	0.181	5.564	2.767
both	Intergenic	parathyroid gland problem (not cancer)	0.107622	0	0.378	1.527	2.767
both	NoCall	parathyroid gland problem (not cancer)	0.0195491	6.28766e-38	0.069	0.139	2.767
both	S	parathyroid gland problem (not cancer)	0.0704926	1.60427e-202	0.247	1.555	2.767
both	VE	parathyroid gland problem (not cancer)	0.0239738	4.43385e-40	0.084	2.36	2.767
both	Yhomolog	parathyroid gland problem (not cancer)	0.0117264	4.006e-05	0.041	1.353	2.767
both	E	adrenocortical insufficiency/addison's disease	0	0.734272	0	0	1.761
both	Intergenic	adrenocortical insufficiency/addison's disease	0.0172537	1.5695e-73	0.062	0.252	1.761
both	NoCall	adrenocortical insufficiency/addison's disease	0.0824767	2.20771e-124	0.297	0.601	1.761
both	S	adrenocortical insufficiency/addison's disease	0.0151546	1.23799e-36	0.055	0.343	1.761
both	VE	adrenocortical insufficiency/addison's disease	0.107471	9.4192e-140	0.388	10.87	1.761
both	Yhomolog	adrenocortical insufficiency/addison's disease	0.0549439	1.49619e-15	0.198	6.514	1.761
both	E	pituitary adenoma/tumour	0.060173	3.20769e-74	0.746	22.953	1.547
both	Intergenic	pituitary adenoma/tumour	0.00328017	1.06755e-14	0.041	0.164	1.547
both	NoCall	pituitary adenoma/tumour	0.0120738	7.11011e-19	0.15	0.303	1.547
both	S	pituitary adenoma/tumour	0.00367361	1.17647e-09	0.046	0.286	1.547
both	VE	pituitary adenoma/tumour	0.00142279	0.00463552	0.018	0.495	1.547
both	Yhomolog	pituitary adenoma/tumour	0	0.869526	0	0	1.547
both	E	eye/eyelid problem	0.00511068	4.90054e-07	0.043	1.317	1.266
both	Intergenic	eye/eyelid problem	0.00120571	9.09413e-06	0.01	0.041	1.266
both	NoCall	eye/eyelid problem	0.0129088	3.74461e-18	0.108	0.219	1.266
both	S	eye/eyelid problem	0.0381592	7.10328e-77	0.32	2.009	1.266
both	VE	eye/eyelid problem	0.0481163	9.18791e-55	0.403	11.306	1.266
both	Yhomolog	eye/eyelid problem	0.0138578	0.000209861	0.116	3.817	1.266
both	E	psychological/psychiatric problem	0.0661621	3.99531e-78	0.182	5.608	1.255
both	Intergenic	psychological/psychiatric problem	0.00673398	2.11436e-27	0.019	0.075	1.255
both	NoCall	psychological/psychiatric problem	0.0380888	1.06014e-53	0.105	0.212	1.255
both	S	psychological/psychiatric problem	0.0402194	2.08738e-86	0.111	0.697	1.255
both	VE	psychological/psychiatric problem	0	0.763128	0	0	1.255
both	Yhomolog	psychological/psychiatric problem	0.211605	1.03865e-50	0.583	19.174	1.255
both	E	encephalitis	0.0334024	4.34263e-38	0.06	1.858	1.33
both	Intergenic	encephalitis	0.00433089	3.19203e-17	0.008	0.032	1.33
both	NoCall	encephalitis	0.131044	1.52188e-169	0.237	0.479	1.33
both	S	encephalitis	0.130715	6.35922e-260	0.236	1.486	1.33
both	VE	encephalitis	0.0552585	4.84868e-63	0.1	2.803	1.33
both	Yhomolog	encephalitis	0.198238	6.10339e-45	0.358	11.785	1.33
both	E	meningitis	0.0257669	3.75082e-32	0.103	3.156	1.073
both	Intergenic	meningitis	0.0807876	0	0.322	1.301	1.073
both	NoCall	meningitis	0.053529	2.86024e-76	0.213	0.431	1.073
both	S	meningitis	0.0777195	1.6397e-168	0.31	1.945	1.073
both	VE	meningitis	0.0042712	1.21013e-06	0.017	0.477	1.073
both	Yhomolog	meningitis	0.00901963	0.00177468	0.036	1.181	1.073
both	E	cranial nerve problem/palsy	0.00225097	0.000274955	0.004	0.129	2.158
both	Intergenic	cranial nerve problem/palsy	0.0911214	0	0.17	0.689	2.158
both	NoCall	cranial nerve problem/palsy	0.111225	1.07165e-169	0.208	0.42	2.158
both	S	cranial nerve problem/palsy	0.202707	0	0.379	2.381	2.158
both	VE	cranial nerve problem/palsy	0	0.177325	0	0	2.158
both	Yhomolog	cranial nerve problem/palsy	0.127667	1.50409e-34	0.239	7.846	2.158
both	E	bell's palsy/facial nerve palsy	0	0.0808011	0	0	1.441
both	Intergenic	bell's palsy/facial nerve palsy	0.00716614	6.94809e-29	0.015	0.061	1.441
both	NoCall	bell's palsy/facial nerve palsy	0.159277	7.56039e-217	0.335	0.678	1.441
both	S	bell's palsy/facial nerve palsy	0.267005	0	0.562	3.534	1.441
both	VE	bell's palsy/facial nerve palsy	0.0271297	1.59509e-33	0.057	1.602	1.441
both	Yhomolog	bell's palsy/facial nerve palsy	0.0143059	0.000103211	0.03	0.99	1.441
both	E	spinal cord disorder	0.00432406	1.99651e-06	0.017	0.521	1.31
both	Intergenic	spinal cord disorder	0.023675	1.04779e-90	0.093	0.375	1.31
both	NoCall	spinal cord disorder	0	0.525863	0	0	1.31
both	S	spinal cord disorder	0.0963389	2.13321e-201	0.378	2.374	1.31
both	VE	spinal cord disorder	0.103865	2.57311e-122	0.407	11.422	1.31
both	Yhomolog	spinal cord disorder	0.0268459	1.15309e-07	0.105	3.46	1.31
both	E	peripheral nerve disorder	0.0122914	1.14132e-14	0.034	1.032	1.19
both	Intergenic	peripheral nerve disorder	0.0571286	1.44193e-200	0.156	0.63	1.19
both	NoCall	peripheral nerve disorder	0.06599	3.72358e-84	0.18	0.364	1.19
both	S	peripheral nerve disorder	0.000802679	0.00769261	0.002	0.014	1.19
both	VE	peripheral nerve disorder	0.00354548	2.80172e-05	0.01	0.271	1.19
both	Yhomolog	peripheral nerve disorder	0.2266	8.50628e-50	0.619	20.334	1.19
both	E	peripheral neuropathy	0.0263394	5.07322e-30	0.201	6.168	0.837
both	Intergenic	peripheral neuropathy	0.0577126	2.08069e-205	0.439	1.777	0.837
both	NoCall	peripheral neuropathy	0.0381268	4.43484e-50	0.29	0.587	0.837
both	S	peripheral neuropathy	0.00181248	5.50503e-05	0.014	0.087	0.837
both	VE	peripheral neuropathy	0	0.751226	0	0	0.837
both	Yhomolog	peripheral neuropathy	0.00734629	0.00713223	0.056	1.839	0.837
both	E	acute infective polyneuritis/guillain-barre syndrome	0.0480974	6.28086e-48	0.044	1.367	0.815
both	Intergenic	acute infective polyneuritis/guillain-barre syndrome	0.0340754	1.73131e-109	0.031	0.127	0.815
both	NoCall	acute infective polyneuritis/guillain-barre syndrome	0.0150444	9.55977e-19	0.014	0.028	0.815
both	S	acute infective polyneuritis/guillain-barre syndrome	0.167831	3.57459e-294	0.155	0.975	0.815
both	VE	acute infective polyneuritis/guillain-barre syndrome	0.0252578	1.81704e-26	0.023	0.655	0.815
both	Yhomolog	acute infective polyneuritis/guillain-barre syndrome	0.791716	1.46351e-153	0.732	24.055	0.815
both	E	trapped nerve/compressed nerve	0.0236879	1.12574e-25	0.06	1.859	0.919
both	Intergenic	trapped nerve/compressed nerve	0.000575301	0.00302421	0.001	0.006	0.919
both	NoCall	trapped nerve/compressed nerve	0.129599	5.3418e-156	0.331	0.668	0.919
both	S	trapped nerve/compressed nerve	0.0223396	6.089e-43	0.057	0.358	0.919
both	VE	trapped nerve/compressed nerve	0.0316077	2.42759e-34	0.081	2.263	0.919
both	Yhomolog	trapped nerve/compressed nerve	0.18401	5.24479e-39	0.47	15.439	0.919
both	E	chronic/degenerative neurological problem	0.0659857	6.46866e-67	0.361	11.095	0.981
both	Intergenic	chronic/degenerative neurological problem	0.00448477	2.72797e-16	0.025	0.099	0.981
both	NoCall	chronic/degenerative neurological problem	0.0034869	1.57653e-05	0.019	0.039	0.981
both	S	chronic/degenerative neurological problem	0.00357454	5.52988e-08	0.02	0.123	0.981
both	VE	chronic/degenerative neurological problem	0.0149846	8.86702e-17	0.082	2.298	0.981
both	Yhomolog	chronic/degenerative neurological problem	0.0903917	1.38449e-19	0.494	16.247	0.981
both	E	multiple sclerosis	0.00280807	1.20074e-05	0.03	0.91	2.665
both	Intergenic	multiple sclerosis	0.0228064	1.43258e-113	0.24	0.971	2.665
both	NoCall	multiple sclerosis	0.0101462	1.55326e-19	0.107	0.216	2.665
both	S	multiple sclerosis	0.00220564	1.61126e-07	0.023	0.146	2.665
both	VE	multiple sclerosis	0.00880658	4.91536e-15	0.093	2.602	2.665
both	Yhomolog	multiple sclerosis	0.0481614	4.95555e-16	0.507	16.678	2.665
both	E	parkinsons disease	0.0245902	1.90476e-20	0.007	0.228	0.515
both	Intergenic	parkinsons disease	0.0442434	8.50716e-113	0.013	0.054	0.515
both	NoCall	parkinsons disease	0.0104939	4.74726e-11	0.003	0.006	0.515
both	S	parkinsons disease	0.00311666	8.34785e-06	0.001	0.006	0.515
both	VE	parkinsons disease	0.945124	0	0.285	8.002	0.515
both	Yhomolog	parkinsons disease	2.28505	0	0.69	22.678	0.515
both	E	epilepsy	0.413166	0	0.335	10.294	0.989
both	Intergenic	epilepsy	0.00419319	1.13703e-15	0.003	0.014	0.989
both	NoCall	epilepsy	0.00827116	1.68347e-11	0.007	0.014	0.989
both	S	epilepsy	0.00951498	2.89232e-19	0.008	0.048	0.989
both	VE	epilepsy	0.236559	5.48813e-245	0.192	5.375	0.989
both	Yhomolog	epilepsy	0.562642	1.30349e-115	0.456	14.985	0.989
both	E	migraine	0	0.0818087	0	0	3.423
both	Intergenic	migraine	0.000485775	0.0009059	0.011	0.046	3.423
both	NoCall	migraine	0.0246485	2.21167e-45	0.581	1.174	3.423
both	S	migraine	0	0.763856	0	0	3.423
both	VE	migraine	0.00510149	2.24219e-09	0.12	3.373	3.423
both	Yhomolog	migraine	0.0121825	4.23505e-05	0.287	9.442	3.423
both	E	head injury	0.0911315	5.48844e-83	0.362	11.146	0.488
both	Intergenic	head injury	0.00107435	0.000140593	0.004	0.017	0.488
both	NoCall	head injury	0.107421	1.03558e-114	0.427	0.863	0.488
both	S	head injury	0.00756285	5.89833e-14	0.03	0.189	0.488
both	VE	head injury	0.0348912	1.66095e-33	0.139	3.892	0.488
both	Yhomolog	head injury	0.00936078	0.00562503	0.037	1.224	0.488
both	E	spinal injury	0.0146574	3.93249e-17	0.12	3.703	0.641
both	Intergenic	spinal injury	0.00413959	4.5669e-16	0.034	0.137	0.641
both	NoCall	spinal injury	0.0017208	0.00172961	0.014	0.029	0.641
both	S	spinal injury	0.0054868	3.57042e-12	0.045	0.283	0.641
both	VE	spinal injury	0.079183	8.37549e-87	0.651	18.245	0.641
both	Yhomolog	spinal injury	0.0165383	6.32525e-05	0.136	4.467	0.641
both	E	eye infection	0.111369	1.59577e-135	0.403	12.389	1.213
both	Intergenic	eye infection	0.023884	1.74234e-96	0.086	0.349	1.213
both	NoCall	eye infection	0.0286966	1.50748e-42	0.104	0.21	1.213
both	S	eye infection	0.0146257	7.2356e-34	0.053	0.332	1.213
both	VE	eye infection	0.0273814	2.22674e-35	0.099	2.778	1.213
both	Yhomolog	eye infection	0.0704897	1.08959e-18	0.255	8.383	1.213
both	E	retinal problem	0.0322281	9.31317e-39	0.138	4.238	1.055
both	Intergenic	retinal problem	0.00281968	2.63178e-12	0.012	0.049	1.055
both	NoCall	retinal problem	0.0792711	4.99261e-109	0.339	0.685	1.055
both	S	retinal problem	0.0340169	6.15709e-73	0.145	0.914	1.055
both	VE	retinal problem	0.0304312	2.15498e-37	0.13	3.649	1.055
both	Yhomolog	retinal problem	0.0551084	2.52691e-14	0.236	7.747	1.055
both	E	diabetic eye disease	0.252133	6.98924e-239	0.413	12.695	0.566
both	Intergenic	diabetic eye disease	0.0973216	1.93271e-303	0.159	0.644	0.566
both	NoCall	diabetic eye disease	0.0277582	1.05944e-32	0.045	0.092	0.566
both	S	diabetic eye disease	0.0133636	9.56533e-25	0.022	0.137	0.566
both	VE	diabetic eye disease	0.0246394	1.8232e-25	0.04	1.131	0.566
both	Yhomolog	diabetic eye disease	0.195594	9.46472e-39	0.32	10.528	0.566
both	E	glaucoma	0.00196735	0.00444714	0.002	0.069	0.864
both	Intergenic	glaucoma	0.00375563	9.45544e-13	0.004	0.017	0.864
both	NoCall	glaucoma	0.686621	0	0.78	1.576	0.864
both	S	glaucoma	0.0668451	5.75821e-111	0.076	0.477	0.864
both	VE	glaucoma	0.0576886	1.50009e-54	0.066	1.838	0.864
both	Yhomolog	glaucoma	0.0634692	4.82291e-13	0.072	2.37	0.864
both	E	cataract	0.00971575	1.60361e-12	0.029	0.891	1.286
both	Intergenic	cataract	0.00602591	5.21062e-24	0.018	0.073	1.286
both	NoCall	cataract	0.0734962	6.78789e-99	0.219	0.443	1.286
both	S	cataract	0.232119	0	0.693	4.352	1.286
both	VE	cataract	0.00885638	9.57601e-12	0.026	0.741	1.286
both	Yhomolog	cataract	0.00497359	0.023679	0.015	0.488	1.286
both	E	eye trauma	0.00347434	0.000925615	0.014	0.439	0.426
both	Intergenic	eye trauma	0.0124503	4.84529e-30	0.051	0.207	0.426
both	NoCall	eye trauma	0.0263334	3.85708e-23	0.108	0.219	0.426
both	S	eye trauma	0.00771418	2.64365e-11	0.032	0.199	0.426
both	VE	eye trauma	0.0825294	9.83557e-60	0.339	9.513	0.426
both	Yhomolog	eye trauma	0.110809	5.73301e-17	0.455	14.972	0.426
both	E	retinal detachment	0.24275	5.19589e-230	0.514	15.806	0.63
both	Intergenic	retinal detachment	0.0229742	2.93918e-73	0.049	0.197	0.63
both	NoCall	retinal detachment	0.135319	3.46112e-152	0.287	0.579	0.63
both	S	retinal detachment	0.0103608	1.53817e-19	0.022	0.138	0.63
both	VE	retinal detachment	0.0336158	4.00868e-34	0.071	1.996	0.63
both	Yhomolog	retinal detachment	0.0272815	1.16059e-06	0.058	1.899	0.63
both	E	retinal artery/vein occlusion	0.00167071	0.00770477	0.011	0.339	0.811
both	Intergenic	retinal artery/vein occlusion	0.0315441	4.07501e-98	0.208	0.841	0.811
both	NoCall	retinal artery/vein occlusion	0.0670446	4.19215e-75	0.442	0.894	0.811
both	S	retinal artery/vein occlusion	0.00275516	3.81242e-06	0.018	0.114	0.811
both	VE	retinal artery/vein occlusion	0.00291755	0.000375908	0.019	0.54	0.811
both	Yhomolog	retinal artery/vein occlusion	0.045619	4.62713e-10	0.301	9.896	0.811
both	E	depression	0.0139501	6.76585e-17	0.063	1.945	1.831
both	Intergenic	depression	0.0193976	1.62501e-71	0.088	0.356	1.831
both	NoCall	depression	0.121687	4.80829e-158	0.552	1.115	1.831
both	S	depression	0.00666755	6.33192e-15	0.03	0.19	1.831
both	VE	depression	0.0459611	6.86867e-53	0.208	5.845	1.831
both	Yhomolog	depression	0.0128795	0.000329221	0.058	1.92	1.831
both	E	anxiety/panic attacks	0.0104672	7.8706e-16	0.04	1.237	1.747
both	Intergenic	anxiety/panic attacks	0.011205	9.2032e-52	0.043	0.174	1.747
both	NoCall	anxiety/panic attacks	0.00166677	0.000477033	0.006	0.013	1.747
both	S	anxiety/panic attacks	0.163215	0	0.627	3.942	1.747
both	VE	anxiety/panic attacks	0.00442226	1.2314e-07	0.017	0.477	1.747
both	Yhomolog	anxiety/panic attacks	0.0692334	1.82675e-20	0.266	8.747	1.747
both	E	nervous breakdown	0.0692445	2.55973e-97	0.38	11.677	1.247
both	Intergenic	nervous breakdown	0.00623024	3.77527e-30	0.034	0.138	1.247
both	NoCall	nervous breakdown	0.0389547	2.73688e-65	0.214	0.432	1.247
both	S	nervous breakdown	0.0378195	5.95988e-97	0.207	1.303	1.247
both	VE	nervous breakdown	0.0180462	3.55487e-27	0.099	2.775	1.247
both	Yhomolog	nervous breakdown	0.0120726	9.09994e-05	0.066	2.176	1.247
both	E	schizophrenia	0.0110278	1.27112e-10	0.013	0.395	0.458
both	Intergenic	schizophrenia	0.000472906	0.0155727	0.001	0.002	0.458
both	NoCall	schizophrenia	0.141627	3.03887e-138	0.165	0.334	0.458
both	S	schizophrenia	0.188313	1.95204e-281	0.22	1.38	0.458
both	VE	schizophrenia	0	0.270899	0	0	0.458
both	Yhomolog	schizophrenia	0.516248	2.95563e-86	0.602	19.788	0.458
both	E	deliberate self-harm/suicide attempt	0.0371654	7.38125e-47	0.187	5.738	1.091
both	Intergenic	deliberate self-harm/suicide attempt	0.0276219	3.82733e-112	0.139	0.561	1.091
both	NoCall	deliberate self-harm/suicide attempt	0.00802376	3.90448e-13	0.04	0.081	1.091
both	S	deliberate self-harm/suicide attempt	0.048965	6.00914e-110	0.246	1.545	1.091
both	VE	deliberate self-harm/suicide attempt	0	0.977204	0	0	1.091
both	Yhomolog	deliberate self-harm/suicide attempt	0.0774212	1.59929e-20	0.389	12.778	1.091
both	E	mania/bipolar disorder/manic depression	0.0727073	2.63283e-70	0.311	9.554	1.241
both	Intergenic	mania/bipolar disorder/manic depression	0.0716971	5.09573e-224	0.306	1.239	1.241
both	NoCall	mania/bipolar disorder/manic depression	0.0118257	7.86606e-15	0.051	0.102	1.241
both	S	mania/bipolar disorder/manic depression	0.0493308	1.52297e-86	0.211	1.325	1.241
both	VE	mania/bipolar disorder/manic depression	0.0164051	1.80431e-17	0.07	1.966	1.241
both	Yhomolog	mania/bipolar disorder/manic depression	0.012074	0.00122266	0.052	1.696	1.241
both	E	bone disorder	0.00555764	1.14285e-09	0.04	1.245	2.581
both	Intergenic	bone disorder	0.0803608	0	0.585	2.366	2.581
both	NoCall	bone disorder	0.00254657	7.53387e-06	0.019	0.037	2.581
both	S	bone disorder	0.0488637	3.77902e-131	0.356	2.236	2.581
both	VE	bone disorder	0	0.268647	0	0	2.581
both	Yhomolog	bone disorder	0	0.146819	0	0	2.581
both	E	back problem	0.0102566	2.71011e-10	0.018	0.543	1.082
both	Intergenic	back problem	0	0.64663	0	0	1.082
both	NoCall	back problem	0.16129	8.06645e-163	0.278	0.561	1.082
both	S	back problem	0.158226	1.6824e-245	0.272	1.713	1.082
both	VE	back problem	0.056994	4.60584e-51	0.098	2.753	1.082
both	Yhomolog	back problem	0.193885	1.08967e-34	0.334	10.978	1.082
both	E	joint disorder	0.00184205	0.00127629	0.001	0.026	1.307
both	Intergenic	joint disorder	0.00259134	3.94226e-12	0.001	0.005	1.307
both	NoCall	joint disorder	0	0.256149	0	0	1.307
both	S	joint disorder	0.0684705	8.05777e-155	0.032	0.2	1.307
both	VE	joint disorder	0.00308364	2.56174e-05	0.001	0.04	1.307
both	Yhomolog	joint disorder	2.07297	0	0.965	31.713	1.307
both	E	muscle/soft tissue problem	0.00482102	3.911e-07	0.004	0.137	1.53
both	Intergenic	muscle/soft tissue problem	0.0297045	1.09517e-115	0.027	0.111	1.53
both	NoCall	muscle/soft tissue problem	0.117925	1.82144e-163	0.109	0.22	1.53
both	S	muscle/soft tissue problem	0.0711031	2.08644e-152	0.066	0.412	1.53
both	VE	muscle/soft tissue problem	0.00881314	4.28302e-12	0.008	0.228	1.53
both	Yhomolog	muscle/soft tissue problem	0.851372	1.16401e-199	0.786	25.827	1.53
both	E	osteomyelitis	0.0774178	5.00544e-89	0.242	7.43	0.682
both	Intergenic	osteomyelitis	0.0236897	7.48972e-90	0.074	0.299	0.682
both	NoCall	osteomyelitis	0.0421555	6.48812e-58	0.132	0.266	0.682
both	S	osteomyelitis	0.0126527	8.783e-28	0.039	0.248	0.682
both	VE	osteomyelitis	0	0.645329	0	0	0.682
both	Yhomolog	osteomyelitis	0.164505	6.13245e-39	0.513	16.879	0.682
both	E	osteoporosis	0	0.127268	0	0	7.663
both	Intergenic	osteoporosis	0.00217713	2.24921e-11	0.001	0.004	7.663
both	NoCall	osteoporosis	1.22404	0	0.491	0.992	7.663
both	S	osteoporosis	1.26751	0	0.508	3.194	7.663
both	VE	osteoporosis	0	0.665496	0	0	7.663
both	Yhomolog	osteoporosis	0	0.774489	0	0	7.663
both	E	spine arthritis/spondylitis	0.049946	9.61643e-62	0.405	12.45	1.579
both	Intergenic	spine arthritis/spondylitis	0.00073695	0.000253229	0.006	0.024	1.579
both	NoCall	spine arthritis/spondylitis	0.023377	6.47394e-35	0.189	0.383	1.579
both	S	spine arthritis/spondylitis	0.0159552	1.01858e-36	0.129	0.813	1.579
both	VE	spine arthritis/spondylitis	0.0051892	6.7075e-08	0.042	1.18	1.579
both	Yhomolog	spine arthritis/spondylitis	0.0281727	2.48915e-08	0.228	7.507	1.579
both	E	prolapsed disc/slipped disc	0.0428607	1.36359e-45	0.076	2.343	0.98
both	Intergenic	prolapsed disc/slipped disc	0	0.67734	0	0	0.98
both	NoCall	prolapsed disc/slipped disc	0.11343	2.12322e-138	0.202	0.407	0.98
both	S	prolapsed disc/slipped disc	0.000663064	0.0172672	0.001	0.007	0.98
both	VE	prolapsed disc/slipped disc	0.319596	0	0.568	15.932	0.98
both	Yhomolog	prolapsed disc/slipped disc	0.0860793	2.49578e-19	0.153	5.03	0.98
both	E	ankylosing spondylitis	0.010542	5.80221e-10	0.077	2.367	0.588
both	Intergenic	ankylosing spondylitis	0.0126748	5.65153e-35	0.093	0.374	0.588
both	NoCall	ankylosing spondylitis	0.0212841	1.11737e-21	0.155	0.314	0.588
both	S	ankylosing spondylitis	0.0504309	8.86357e-75	0.368	2.314	0.588
both	VE	ankylosing spondylitis	0	0.138195	0	0	0.588
both	Yhomolog	ankylosing spondylitis	0.0420488	3.06682e-08	0.307	10.092	0.588
both	E	myositis/myopathy	0.00654132	1.84519e-09	0.068	2.076	1.52
both	Intergenic	myositis/myopathy	0.000509107	0.00232021	0.005	0.021	1.52
both	NoCall	myositis/myopathy	0	0.333339	0	0	1.52
both	S	myositis/myopathy	0.0104085	1.32187e-24	0.107	0.675	1.52
both	VE	myositis/myopathy	0.0106212	1.03006e-14	0.11	3.075	1.52
both	Yhomolog	myositis/myopathy	0.0688098	2.68085e-18	0.71	23.348	1.52
both	E	low platelets/platelet disorder	0.0211958	1.08914e-25	0.052	1.607	1.679
both	Intergenic	low platelets/platelet disorder	0.0571734	3.81032e-214	0.141	0.57	1.679
both	NoCall	low platelets/platelet disorder	0	0.780024	0	0	1.679
both	S	low platelets/platelet disorder	0.207409	0	0.511	3.213	1.679
both	VE	low platelets/platelet disorder	0.108818	5.98111e-127	0.268	7.524	1.679
both	Yhomolog	low platelets/platelet disorder	0.011038	0.000713965	0.027	0.895	1.679
both	E	iron deficiency anaemia	0.0537322	5.66711e-92	0.245	7.545	4.623
both	Intergenic	iron deficiency anaemia	0.0390017	3.13326e-217	0.178	0.72	4.623
both	NoCall	iron deficiency anaemia	0.0607212	4.90079e-122	0.277	0.56	4.623
both	S	iron deficiency anaemia	0.0639237	4.53938e-197	0.292	1.834	4.623
both	VE	iron deficiency anaemia	0.00164142	0.000328469	0.007	0.21	4.623
both	Yhomolog	iron deficiency anaemia	0	0.544019	0	0	4.623
both	E	pernicious anaemia	0.0284677	4.51485e-42	0.047	1.437	2.943
both	Intergenic	pernicious anaemia	0.0340019	3.71261e-160	0.056	0.226	2.943
both	NoCall	pernicious anaemia	0.1513	1.24319e-253	0.248	0.502	2.943
both	S	pernicious anaemia	0.0326059	6.98136e-86	0.054	0.336	2.943
both	VE	pernicious anaemia	0.0291991	6.18545e-44	0.048	1.344	2.943
both	Yhomolog	pernicious anaemia	0.333757	2.76272e-96	0.548	18.007	2.943
both	E	sarcoidosis	0.000987137	0.0235873	0.004	0.135	1.025
both	Intergenic	sarcoidosis	0.0224974	9.92181e-86	0.1	0.404	1.025
both	NoCall	sarcoidosis	0.0166503	5.43826e-24	0.074	0.149	1.025
both	S	sarcoidosis	0.00238783	1.98576e-06	0.011	0.067	1.025
both	VE	sarcoidosis	0.16741	1.66857e-194	0.743	20.852	1.025
both	Yhomolog	sarcoidosis	0.0152358	6.89097e-05	0.068	2.225	1.025
both	E	vasculitis	0.0432288	1.50868e-41	0.224	6.875	1.254
both	Intergenic	vasculitis	0.00393127	1.39648e-13	0.02	0.082	1.254
both	NoCall	vasculitis	0	0.224685	0	0	1.254
both	S	vasculitis	0.00388698	4.53049e-08	0.02	0.126	1.254
both	VE	vasculitis	0.00552656	1.07884e-06	0.029	0.802	1.254
both	Yhomolog	vasculitis	0.136803	5.91399e-27	0.707	23.258	1.254
both	E	connective tissue disorder	0.0233088	2.65192e-31	0.454	13.955	2.943
both	Intergenic	connective tissue disorder	0.000287399	0.0189052	0.006	0.023	2.943
both	NoCall	connective tissue disorder	0.00206113	0.000169419	0.04	0.081	2.943
both	S	connective tissue disorder	0.0114868	2.63798e-28	0.224	1.405	2.943
both	VE	connective tissue disorder	0.00676101	2.44045e-10	0.132	3.692	2.943
both	Yhomolog	connective tissue disorder	0.00746132	0.00320933	0.145	4.775	2.943
both	E	allergy/hypersensitivity/anaphylaxis	0.00811194	9.53306e-13	0.06	1.842	2.006
both	Intergenic	allergy/hypersensitivity/anaphylaxis	0.000789321	5.25972e-05	0.006	0.024	2.006
both	NoCall	allergy/hypersensitivity/anaphylaxis	0.0365162	8.28598e-61	0.27	0.545	2.006
both	S	allergy/hypersensitivity/anaphylaxis	0.0476973	1.03634e-120	0.352	2.214	2.006
both	VE	allergy/hypersensitivity/anaphylaxis	0.0310085	4.30346e-45	0.229	6.423	2.006
both	Yhomolog	allergy/hypersensitivity/anaphylaxis	0.011284	0.000165115	0.083	2.74	2.006
both	E	polymyalgia rheumatica	0.0106928	7.0002e-15	0.034	1.047	2.488
both	Intergenic	polymyalgia rheumatica	0.00535427	1.45195e-23	0.017	0.069	2.488
both	NoCall	polymyalgia rheumatica	0.0969263	6.4485e-143	0.308	0.623	2.488
both	S	polymyalgia rheumatica	0.181974	0	0.579	3.64	2.488
both	VE	polymyalgia rheumatica	0.014749	2.62195e-20	0.047	1.317	2.488
both	Yhomolog	polymyalgia rheumatica	0.00449265	0.0239317	0.014	0.47	2.488
both	E	systemic lupus erythematosis/sle	0.0063597	4.7309e-13	0.031	0.963	7.396
both	Intergenic	systemic lupus erythematosis/sle	0.000553058	0.000106994	0.003	0.011	7.396
both	NoCall	systemic lupus erythematosis/sle	0.00292304	9.91737e-08	0.014	0.029	7.396
both	S	systemic lupus erythematosis/sle	0.034743	2.81633e-115	0.171	1.075	7.396
both	VE	systemic lupus erythematosis/sle	0.0910432	6.15859e-168	0.448	12.572	7.396
both	Yhomolog	systemic lupus erythematosis/sle	0.0674915	5.4206e-26	0.332	10.924	7.396
both	E	sjogren's syndrome/sicca syndrome	0.0646778	1.24526e-122	0.219	6.728	14.65
both	Intergenic	sjogren's syndrome/sicca syndrome	0.0158438	1.70181e-99	0.054	0.217	14.65
both	NoCall	sjogren's syndrome/sicca syndrome	0.141047	0	0.477	0.964	14.65
both	S	sjogren's syndrome/sicca syndrome	0.0399084	9.66461e-138	0.135	0.848	14.65
both	VE	sjogren's syndrome/sicca syndrome	0.0341681	5.45471e-67	0.116	3.241	14.65
both	Yhomolog	sjogren's syndrome/sicca syndrome	0	0.173926	0	0	14.65
both	E	scleroderma/systemic sclerosis	0.326067	0	0.814	25.036	6.214
both	Intergenic	scleroderma/systemic sclerosis	0.00227433	2.58396e-14	0.006	0.023	6.214
both	NoCall	scleroderma/systemic sclerosis	0.0425817	1.66229e-86	0.106	0.215	6.214
both	S	scleroderma/systemic sclerosis	0.000341739	0.0281151	0.001	0.005	6.214
both	VE	scleroderma/systemic sclerosis	0.0232943	7.44814e-42	0.058	1.631	6.214
both	Yhomolog	scleroderma/systemic sclerosis	0.00597842	0.00234105	0.015	0.491	6.214
both	E	allergy or anaphylactic reaction to food	0.035277	3.929e-47	0.114	3.497	1.984
both	Intergenic	allergy or anaphylactic reaction to food	0.00132594	3.81027e-07	0.004	0.017	1.984
both	NoCall	allergy or anaphylactic reaction to food	0.00253649	2.64671e-05	0.008	0.017	1.984
both	S	allergy or anaphylactic reaction to food	0.0232086	3.4161e-56	0.075	0.47	1.984
both	VE	allergy or anaphylactic reaction to food	0.00807236	3.23426e-12	0.026	0.73	1.984
both	Yhomolog	allergy or anaphylactic reaction to food	0.239811	1.6532e-63	0.773	25.413	1.984
both	E	allergy or anaphylactic reaction to drug	0.00295002	1.24448e-05	0.015	0.461	2.213
both	Intergenic	allergy or anaphylactic reaction to drug	0	0.184173	0	0	2.213
both	NoCall	allergy or anaphylactic reaction to drug	0.0336782	6.7927e-58	0.171	0.346	2.213
both	S	allergy or anaphylactic reaction to drug	0.0750405	2.30208e-194	0.381	2.396	2.213
both	VE	allergy or anaphylactic reaction to drug	0.0143327	2.31579e-22	0.073	2.042	2.213
both	Yhomolog	allergy or anaphylactic reaction to drug	0.0708571	9.41428e-22	0.36	11.833	2.213
both	E	hayfever/allergic rhinitis	0.0276419	3.4913e-27	0.072	2.218	1.123
both	Intergenic	hayfever/allergic rhinitis	0.0234328	7.14963e-73	0.061	0.247	1.123
both	NoCall	hayfever/allergic rhinitis	0.193929	9.31456e-212	0.506	1.022	1.123
both	S	hayfever/allergic rhinitis	0.00260253	7.63147e-06	0.007	0.043	1.123
both	VE	hayfever/allergic rhinitis	0.129121	9.33123e-123	0.337	9.45	1.123
both	Yhomolog	hayfever/allergic rhinitis	0.00647233	0.0193522	0.017	0.555	1.123
both	E	peripheral nerve injury	0	0.341835	0	0	1.05
both	Intergenic	peripheral nerve injury	0.0349887	3.25666e-130	0.176	0.712	1.05
both	NoCall	peripheral nerve injury	0.122652	8.24861e-163	0.618	1.248	1.05
both	S	peripheral nerve injury	0.0142244	1.10696e-30	0.072	0.45	1.05
both	VE	peripheral nerve injury	0.00555955	7.27764e-08	0.028	0.785	1.05
both	Yhomolog	peripheral nerve injury	0.0211374	3.2884e-06	0.106	3.5	1.05
both	E	pneumonia	0.00756946	3.34399e-09	0.016	0.499	0.981
both	Intergenic	pneumonia	0	0.0875675	0	0	0.981
both	NoCall	pneumonia	0.0644873	1.91495e-78	0.138	0.279	0.981
both	S	pneumonia	0.112586	5.3723e-208	0.241	1.517	0.981
both	VE	pneumonia	0	0.0699785	0	0	0.981
both	Yhomolog	pneumonia	0.281883	1.19429e-58	0.604	19.864	0.981
both	E	peptic ulcer	0.0513288	1.37745e-47	0.462	14.206	0.593
both	Intergenic	peptic ulcer	0.022082	9.05052e-67	0.199	0.803	0.593
both	NoCall	peptic ulcer	0	0.0530134	0	0	0.593
both	S	peptic ulcer	0.00203054	9.89528e-05	0.018	0.115	0.593
both	VE	peptic ulcer	0.0155901	7.20983e-16	0.14	3.935	0.593
both	Yhomolog	peptic ulcer	0.0200837	4.96594e-05	0.181	5.942	0.593
both	E	other renal/kidney problem	0.0282519	6.9449e-29	0.107	3.304	1.157
both	Intergenic	other renal/kidney problem	0.00554249	2.89775e-19	0.021	0.085	1.157
both	NoCall	other renal/kidney problem	0.0107829	7.03589e-14	0.041	0.083	1.157
both	S	other renal/kidney problem	0.0458631	4.81032e-82	0.174	1.096	1.157
both	VE	other renal/kidney problem	0.0215452	7.82637e-23	0.082	2.298	1.157
both	Yhomolog	other renal/kidney problem	0.150992	8.46006e-31	0.574	18.876	1.157
both	E	muscle or soft tissue injuries	0.00503811	9.58732e-06	0.034	1.048	0.631
both	Intergenic	muscle or soft tissue injuries	0.0118912	4.89185e-35	0.08	0.325	0.631
both	NoCall	muscle or soft tissue injuries	0.00326683	0.000107542	0.022	0.045	0.631
both	S	muscle or soft tissue injuries	0.0650737	2.65944e-102	0.44	2.766	0.631
both	VE	muscle or soft tissue injuries	0	0.163302	0	0	0.631
both	Yhomolog	muscle or soft tissue injuries	0.0625826	2.92654e-12	0.423	13.916	0.631
both	E	burns	0.0152236	9.25402e-14	0.107	3.305	0.551
both	Intergenic	burns	0.0352424	3.764e-94	0.249	1.006	0.551
both	NoCall	burns	0.0314134	2.92003e-31	0.222	0.448	0.551
both	S	burns	0.049215	3.91673e-73	0.347	2.183	0.551
both	VE	burns	0.00519712	1.09721e-05	0.037	1.029	0.551
both	Yhomolog	burns	0.00536649	0.047717	0.038	1.245	0.551
both	E	alcohol dependency	0.178677	2.3997e-131	0.436	13.402	0.347
both	Intergenic	alcohol dependency	0.0337479	1.32282e-82	0.082	0.333	0.347
both	NoCall	alcohol dependency	0.0239261	2.99373e-22	0.058	0.118	0.347
both	S	alcohol dependency	0.0861151	1.03405e-115	0.21	1.32	0.347
both	VE	alcohol dependency	0	0.513254	0	0	0.347
both	Yhomolog	alcohol dependency	0.0875428	2.13082e-14	0.214	7.019	0.347
both	E	bronchitis	0.0164665	2.79454e-20	0.124	3.819	1.255
both	Intergenic	bronchitis	0.00193214	9.42634e-09	0.015	0.059	1.255
both	NoCall	bronchitis	0.000697537	0.0390571	0.005	0.011	1.255
both	S	bronchitis	0.0323004	3.53554e-68	0.244	1.531	1.255
both	VE	bronchitis	0.00232618	0.000460697	0.018	0.492	1.255
both	Yhomolog	bronchitis	0.078877	1.60967e-19	0.595	19.556	1.255
both	E	nasal/sinus disorder	0.0705101	3.41262e-69	0.168	5.171	0.902
both	Intergenic	nasal/sinus disorder	0.0017623	4.4246e-07	0.004	0.017	0.902
both	NoCall	nasal/sinus disorder	0.0288187	2.58187e-34	0.069	0.139	0.902
both	S	nasal/sinus disorder	0.0443648	4.01685e-79	0.106	0.665	0.902
both	VE	nasal/sinus disorder	0.257782	2.70719e-252	0.615	17.242	0.902
both	Yhomolog	nasal/sinus disorder	0.0160785	0.00017116	0.038	1.261	0.902
both	E	throat or larynx disorder	0.0370809	5.27266e-51	0.103	3.169	1.192
both	Intergenic	throat or larynx disorder	0.00640211	8.50092e-30	0.018	0.072	1.192
both	NoCall	throat or larynx disorder	0.0301049	5.76358e-49	0.084	0.169	1.192
both	S	throat or larynx disorder	0.0530754	4.74519e-130	0.148	0.927	1.192
both	VE	throat or larynx disorder	0.190469	1.14237e-258	0.529	14.847	1.192
both	Yhomolog	throat or larynx disorder	0.0426631	5.51461e-13	0.119	3.898	1.192
both	E	ear/vestibular disorder	0.0344453	2.42017e-37	0.086	2.652	0.94
both	Intergenic	ear/vestibular disorder	0	0.95861	0	0	0.94
both	NoCall	ear/vestibular disorder	0.0125801	5.02408e-17	0.031	0.064	0.94
both	S	ear/vestibular disorder	0.00326372	1.10164e-07	0.008	0.051	0.94
both	VE	ear/vestibular disorder	0	0.076996	0	0	0.94
both	Yhomolog	ear/vestibular disorder	0.349198	5.89264e-74	0.874	28.737	0.94
both	E	chronic sinusitis	0.001956	0.00461729	0.001	0.024	1.476
both	Intergenic	chronic sinusitis	0.491544	0	0.196	0.792	1.476
both	NoCall	chronic sinusitis	0.780419	0	0.311	0.629	1.476
both	S	chronic sinusitis	0.12445	3.65558e-204	0.05	0.312	1.476
both	VE	chronic sinusitis	1.08446	0	0.432	12.127	1.476
both	Yhomolog	chronic sinusitis	0.0253012	5.13849e-06	0.01	0.332	1.476
both	E	nasal polyps	0.0555695	6.00145e-50	0.353	10.869	0.508
both	Intergenic	nasal polyps	0.00113066	0.000117822	0.007	0.029	0.508
both	NoCall	nasal polyps	0.0530402	4.6569e-56	0.337	0.682	0.508
both	S	nasal polyps	0.000701523	0.0241166	0.004	0.028	0.508
both	VE	nasal polyps	0.00751983	3.35594e-08	0.048	1.341	0.508
both	Yhomolog	nasal polyps	0.0392754	2.2492e-08	0.25	8.212	0.508
both	E	vocal cord polyp	0.169128	6.63705e-181	0.581	17.857	1.069
both	Intergenic	vocal cord polyp	0.0141533	2.27908e-51	0.049	0.196	1.069
both	NoCall	vocal cord polyp	0.0381938	1.12777e-49	0.131	0.265	1.069
both	S	vocal cord polyp	0	0.0604241	0	0	1.069
both	VE	vocal cord polyp	0.0320553	1.68034e-36	0.11	3.087	1.069
both	Yhomolog	vocal cord polyp	0.0377384	1.30199e-09	0.13	4.26	1.069
both	E	otosclerosis	0.0177235	8.73469e-31	0.105	3.229	2.036
both	Intergenic	otosclerosis	0.00130417	1.31546e-08	0.008	0.031	2.036
both	NoCall	otosclerosis	0.009103	2.62404e-19	0.054	0.109	2.036
both	S	otosclerosis	0	0.46175	0	0	2.036
both	VE	otosclerosis	0.140677	6.75603e-236	0.833	23.373	2.036
both	Yhomolog	otosclerosis	0	0.991364	0	0	2.036
both	E	meniere's disease	0.0530128	1.06844e-66	0.08	2.461	1.514
both	Intergenic	meniere's disease	0.00314835	2.20396e-14	0.005	0.019	1.514
both	NoCall	meniere's disease	0.0502239	2.21293e-74	0.076	0.153	1.514
both	S	meniere's disease	0.0698871	1.50999e-157	0.105	0.663	1.514
both	VE	meniere's disease	0.472364	0	0.713	19.998	1.514
both	Yhomolog	meniere's disease	0.0138428	7.93495e-05	0.021	0.687	1.514
both	E	cerebral aneurysm	0.00428153	1.83796e-06	0.014	0.439	1.415
both	Intergenic	cerebral aneurysm	0.0402613	2.2958e-155	0.134	0.542	1.415
both	NoCall	cerebral aneurysm	0.084291	5.9588e-117	0.281	0.567	1.415
both	S	cerebral aneurysm	0.162737	0	0.542	3.408	1.415
both	VE	cerebral aneurysm	0.00852972	1.04443e-11	0.028	0.797	1.415
both	Yhomolog	cerebral aneurysm	0	0.793439	0	0	1.415
both	E	polycystic kidney	0.00604061	1.41652e-09	0.016	0.502	1.346
both	Intergenic	polycystic kidney	0	0.419001	0	0	1.346
both	NoCall	polycystic kidney	0.064082	9.39217e-102	0.173	0.35	1.346
both	S	polycystic kidney	0.0374178	5.61874e-92	0.101	0.636	1.346
both	VE	polycystic kidney	0.0218278	3.22276e-31	0.059	1.655	1.346
both	Yhomolog	polycystic kidney	0.240565	1.69264e-65	0.65	21.379	1.346
both	E	thyroiditis	0.00349977	6.98793e-08	0.031	0.948	6.52
both	Intergenic	thyroiditis	0.0127584	5.76932e-78	0.112	0.454	6.52
both	NoCall	thyroiditis	0.00681027	3.03526e-16	0.06	0.121	6.52
both	S	thyroiditis	0.0190479	1.1007e-64	0.168	1.054	6.52
both	VE	thyroiditis	0.0306541	2.10175e-58	0.27	7.569	6.52
both	Yhomolog	thyroiditis	0.0408175	1.72774e-16	0.359	11.814	6.52
both	E	hypopituitarism	0.00708812	5.66964e-10	0.008	0.258	1.51
both	Intergenic	hypopituitarism	0.0214586	2.0504e-85	0.025	0.103	1.51
both	NoCall	hypopituitarism	0.00128297	0.00415769	0.002	0.003	1.51
both	S	hypopituitarism	0.000405148	0.0453175	0	0.003	1.51
both	VE	hypopituitarism	0.691628	0	0.819	22.97	1.51
both	Yhomolog	hypopituitarism	0.122613	8.50866e-31	0.145	4.773	1.51
both	E	cerebral palsy	0.0169928	1.88983e-19	0.15	4.626	0.852
both	Intergenic	cerebral palsy	0.0214406	1.37658e-75	0.19	0.767	0.852
both	NoCall	cerebral palsy	0.034983	6.64215e-45	0.31	0.626	0.852
both	S	cerebral palsy	0.00278516	8.15355e-07	0.025	0.155	0.852
both	VE	cerebral palsy	0.0239504	2.94736e-27	0.212	5.946	0.852
both	Yhomolog	cerebral palsy	0.0128273	0.000452955	0.114	3.733	0.852
both	E	other neurological problem	0.0127629	5.48884e-17	0.051	1.568	1.295
both	Intergenic	other neurological problem	0.0304826	4.0282e-122	0.122	0.492	1.295
both	NoCall	other neurological problem	0.103085	2.34377e-147	0.412	0.832	1.295
both	S	other neurological problem	0.0260105	1.2261e-58	0.104	0.653	1.295
both	VE	other neurological problem	0.0780041	4.72727e-97	0.312	8.739	1.295
both	Yhomolog	other neurological problem	0	0.906494	0	0	1.295
both	E	optic neuritis	0.00412118	1.10211e-06	0.028	0.847	1.44
both	Intergenic	optic neuritis	0.00459082	9.63086e-21	0.031	0.124	1.44
both	NoCall	optic neuritis	0.0782894	1.02733e-117	0.523	1.058	1.44
both	S	optic neuritis	0.0336247	9.02801e-79	0.225	1.413	1.44
both	VE	optic neuritis	0.0116276	1.3906e-16	0.078	2.18	1.44
both	Yhomolog	optic neuritis	0.0173153	7.83819e-06	0.116	3.806	1.44
both	E	headaches (not migraine)	0.0396545	8.95747e-54	0.111	3.423	1.595
both	Intergenic	headaches (not migraine)	0.00765954	6.62882e-35	0.021	0.087	1.595
both	NoCall	headaches (not migraine)	0.0218387	1.39151e-35	0.061	0.124	1.595
both	S	headaches (not migraine)	0	0.667319	0	0	1.595
both	VE	headaches (not migraine)	0.262512	0	0.737	20.664	1.595
both	Yhomolog	headaches (not migraine)	0.024635	5.13014e-08	0.069	2.273	1.595
both	E	myasthenia gravis	0.113874	2.33984e-114	0.32	9.849	1.25
both	Intergenic	myasthenia gravis	0.00245252	1.35352e-09	0.007	0.028	1.25
both	NoCall	myasthenia gravis	0.107096	9.39978e-127	0.301	0.609	1.25
both	S	myasthenia gravis	0.0111851	6.35498e-22	0.031	0.198	1.25
both	VE	myasthenia gravis	0.0128499	1.21772e-14	0.036	1.014	1.25
both	Yhomolog	myasthenia gravis	0.108127	3.57975e-23	0.304	9.997	1.25
both	E	polycythaemia vera	0.226974	6.99078e-186	0.644	19.82	0.517
both	Intergenic	polycythaemia vera	0.0362407	6.3439e-99	0.103	0.416	0.517
both	NoCall	polycythaemia vera	0.00887205	4.07787e-10	0.025	0.051	0.517
both	S	polycythaemia vera	0.0686745	1.53036e-103	0.195	1.226	0.517
both	VE	polycythaemia vera	0.011412	4.41246e-11	0.032	0.909	0.517
both	Yhomolog	polycythaemia vera	0	0.23614	0	0	0.517
both	E	hiv/aids	0.0370272	4.28954e-24	0.073	2.232	0.183
both	Intergenic	hiv/aids	0.0173209	2.82519e-36	0.034	0.137	0.183
both	NoCall	hiv/aids	0.00793856	3.49845e-07	0.016	0.031	0.183
both	S	hiv/aids	0	0.406218	0	0	0.183
both	VE	hiv/aids	0.0326435	7.89119e-22	0.064	1.795	0.183
both	Yhomolog	hiv/aids	0.415161	5.56002e-52	0.814	26.757	0.183
both	E	tuberculosis (tb)	0.0162989	5.85704e-19	0.029	0.88	1.218
both	Intergenic	tuberculosis (tb)	0.264574	0	0.464	1.877	1.218
both	NoCall	tuberculosis (tb)	0.011051	1.742e-15	0.019	0.039	1.218
both	S	tuberculosis (tb)	0.259883	0	0.456	2.867	1.218
both	VE	tuberculosis (tb)	0	0.488965	0	0	1.218
both	Yhomolog	tuberculosis (tb)	0.0179236	2.98707e-05	0.031	1.034	1.218
both	E	malaria	0.0118826	7.68283e-13	0.026	0.795	0.592
both	Intergenic	malaria	0.254477	0	0.554	2.238	0.592
both	NoCall	malaria	0.00262365	0.000252908	0.006	0.012	0.592
both	S	malaria	0.149205	2.81616e-257	0.325	2.04	0.592
both	VE	malaria	0.0232188	4.62751e-24	0.051	1.417	0.592
both	Yhomolog	malaria	0.0182851	6.93094e-05	0.04	1.308	0.592
both	E	helicobacter pylori	0	0.168384	0	0	1.288
both	Intergenic	helicobacter pylori	0.0113521	9.41943e-50	0.025	0.101	1.288
both	NoCall	helicobacter pylori	0.0299465	4.50809e-47	0.066	0.133	1.288
both	S	helicobacter pylori	0.0624624	2.15658e-147	0.138	0.865	1.288
both	VE	helicobacter pylori	0.02501	1.8934e-34	0.055	1.545	1.288
both	Yhomolog	helicobacter pylori	0.325131	4.00199e-85	0.716	23.549	1.288
both	E	clotting disorder/excessive bleeding	0	0.130219	0	0	1.982
both	Intergenic	clotting disorder/excessive bleeding	0.00585902	5.45876e-27	0.03	0.123	1.982
both	NoCall	clotting disorder/excessive bleeding	0.00151887	0.00104903	0.008	0.016	1.982
both	S	clotting disorder/excessive bleeding	0	0.127277	0	0	1.982
both	VE	clotting disorder/excessive bleeding	0.0979004	6.21228e-132	0.507	14.229	1.982
both	Yhomolog	clotting disorder/excessive bleeding	0.0876972	1.12797e-24	0.454	14.94	1.982
both	E	anaemia	0.0226275	2.48264e-32	0.081	2.496	2.876
both	Intergenic	anaemia	0.00189268	5.00063e-10	0.007	0.027	2.876
both	NoCall	anaemia	0.000964492	0.0079073	0.003	0.007	2.876
both	S	anaemia	0.044702	9.39334e-112	0.16	1.008	2.876
both	VE	anaemia	0.0474592	3.77465e-67	0.17	4.774	2.876
both	Yhomolog	anaemia	0.161168	2.21501e-45	0.578	19.004	2.876
both	E	hereditary/genetic haematological disorder	0.00617122	2.98805e-09	0.046	1.401	1.315
both	Intergenic	hereditary/genetic haematological disorder	0	0.891989	0	0	1.315
both	NoCall	hereditary/genetic haematological disorder	0.00179454	0.000508845	0.013	0.027	1.315
both	S	hereditary/genetic haematological disorder	0.106471	2.3409e-242	0.786	4.94	1.315
both	VE	hereditary/genetic haematological disorder	0.00338327	9.15521e-06	0.025	0.7	1.315
both	Yhomolog	hereditary/genetic haematological disorder	0.0176405	7.17133e-06	0.13	4.281	1.315
both	E	eczema/dermatitis	0.0112805	1.41859e-14	0.07	2.154	1.153
both	Intergenic	eczema/dermatitis	0.00306766	3.1411e-13	0.019	0.077	1.153
both	NoCall	eczema/dermatitis	0.0140488	1.05415e-20	0.087	0.176	1.153
both	S	eczema/dermatitis	0.0049499	5.82934e-12	0.031	0.193	1.153
both	VE	eczema/dermatitis	0.0935992	6.62511e-111	0.581	16.3	1.153
both	Yhomolog	eczema/dermatitis	0.0341077	2.12629e-09	0.212	6.962	1.153
both	E	psoriasis	0.192624	1.72246e-164	0.257	7.915	0.836
both	Intergenic	psoriasis	0.0502241	8.49479e-142	0.067	0.271	0.836
both	NoCall	psoriasis	0.123868	2.05561e-125	0.165	0.334	0.836
both	S	psoriasis	0.114451	4.59627e-178	0.153	0.961	0.836
both	VE	psoriasis	0.166136	5.60097e-145	0.222	6.226	0.836
both	Yhomolog	psoriasis	0.101149	7.37526e-19	0.135	4.443	0.836
both	E	blistering/desquamating skin disorder	0.125726	1.36502e-135	0.375	11.519	0.978
both	Intergenic	blistering/desquamating skin disorder	0.00088321	0.000160148	0.003	0.011	0.978
both	NoCall	blistering/desquamating skin disorder	0.192	1.28845e-242	0.572	1.156	0.978
both	S	blistering/desquamating skin disorder	0.00120031	0.0010678	0.004	0.022	0.978
both	VE	blistering/desquamating skin disorder	0.0158686	5.76321e-19	0.047	1.326	0.978
both	Yhomolog	blistering/desquamating skin disorder	0	0.0655313	0	0	0.978
both	E	chronic skin ulcers	0.0267743	3.81065e-28	0.155	4.767	0.732
both	Intergenic	chronic skin ulcers	0.0292195	1.08123e-96	0.169	0.684	0.732
both	NoCall	chronic skin ulcers	0.054758	1.72946e-65	0.317	0.64	0.732
both	S	chronic skin ulcers	0.0448415	2.45002e-82	0.26	1.631	0.732
both	VE	chronic skin ulcers	0.00251453	0.00066162	0.015	0.408	0.732
both	Yhomolog	chronic skin ulcers	0.014629	0.000273524	0.085	2.784	0.732
both	E	malabsorption/coeliac disease	0	0.966738	0	0	2.291
both	Intergenic	malabsorption/coeliac disease	0.00837435	9.7274e-42	0.064	0.258	2.291
both	NoCall	malabsorption/coeliac disease	0.0142979	3.65419e-26	0.109	0.22	2.291
both	S	malabsorption/coeliac disease	0.0142243	2.65837e-39	0.108	0.682	2.291
both	VE	malabsorption/coeliac disease	0.033176	1.00227e-50	0.253	7.095	2.291
both	Yhomolog	malabsorption/coeliac disease	0.0610771	2.11783e-19	0.466	15.31	2.291
both	E	duodenal ulcer	0.0162161	4.46754e-16	0.018	0.551	0.559
both	Intergenic	duodenal ulcer	0.0221366	1.35023e-66	0.024	0.099	0.559
both	NoCall	duodenal ulcer	0.0269584	5.09272e-30	0.03	0.06	0.559
both	S	duodenal ulcer	0.0378749	4.26892e-63	0.042	0.263	0.559
both	VE	duodenal ulcer	0.0711726	3.24973e-66	0.079	2.205	0.559
both	Yhomolog	duodenal ulcer	0.731016	1.61679e-131	0.807	26.544	0.559
both	E	diverticular disease/diverticulitis	0.00143982	0.00422526	0.01	0.299	1.677
both	Intergenic	diverticular disease/diverticulitis	0.0958509	0	0.647	2.618	1.677
both	NoCall	diverticular disease/diverticulitis	0.00629989	7.91564e-11	0.043	0.086	1.677
both	S	diverticular disease/diverticulitis	0.0327285	9.95452e-76	0.221	1.389	1.677
both	VE	diverticular disease/diverticulitis	0	0.438254	0	0	1.677
both	Yhomolog	diverticular disease/diverticulitis	0.0117152	0.000260283	0.079	2.602	1.677
both	E	colitis/not crohns or ulcerative colitis	0.134093	2.31861e-150	0.183	5.622	1.117
both	Intergenic	colitis/not crohns or ulcerative colitis	0.0244722	2.36437e-91	0.033	0.135	1.117
both	NoCall	colitis/not crohns or ulcerative colitis	0.230574	9.74978e-303	0.314	0.635	1.117
both	S	colitis/not crohns or ulcerative colitis	0.208566	0	0.284	1.787	1.117
both	VE	colitis/not crohns or ulcerative colitis	0	0.053469	0	0	1.117
both	Yhomolog	colitis/not crohns or ulcerative colitis	0.13585	5.57924e-32	0.185	6.088	1.117
both	E	rectal or colon adenoma/polyps	0.0205547	1.08324e-26	0.179	5.499	0.943
both	Intergenic	rectal or colon adenoma/polyps	0.0401363	4.63486e-162	0.349	1.412	0.943
both	NoCall	rectal or colon adenoma/polyps	0.00361348	1.10148e-06	0.031	0.064	0.943
both	S	rectal or colon adenoma/polyps	0.0460924	1.14599e-103	0.401	2.52	0.943
both	VE	rectal or colon adenoma/polyps	0.00455847	3.64218e-07	0.04	1.112	0.943
both	Yhomolog	rectal or colon adenoma/polyps	0	0.81145	0	0	0.943
both	E	inflammatory bowel disease	0.121971	1.30243e-140	0.248	7.624	1.373
both	Intergenic	inflammatory bowel disease	0.0245915	3.23195e-94	0.05	0.202	1.373
both	NoCall	inflammatory bowel disease	0.0623383	1.16023e-85	0.127	0.256	1.373
both	S	inflammatory bowel disease	0.0829556	6.89396e-174	0.169	1.06	1.373
both	VE	inflammatory bowel disease	0.200154	8.47446e-234	0.407	11.41	1.373
both	Yhomolog	inflammatory bowel disease	0	0.741029	0	0	1.373
both	E	crohns disease	0.161868	2.40971e-176	0.348	10.694	1.371
both	Intergenic	crohns disease	0.00489198	3.70079e-19	0.011	0.042	1.371
both	NoCall	crohns disease	0.0725559	2.5338e-94	0.156	0.315	1.371
both	S	crohns disease	0.0784485	3.87125e-156	0.169	1.059	1.371
both	VE	crohns disease	0.0561115	1.17359e-63	0.121	3.381	1.371
both	Yhomolog	crohns disease	0.0916374	1.43737e-21	0.197	6.472	1.371
both	E	ulcerative colitis	0.00130973	0.0106806	0.003	0.1	1.132
both	Intergenic	ulcerative colitis	0.0458747	1.38227e-165	0.114	0.462	1.132
both	NoCall	ulcerative colitis	0.0640641	8.50706e-84	0.16	0.323	1.132
both	S	ulcerative colitis	0.00139738	0.000369037	0.003	0.022	1.132
both	VE	ulcerative colitis	0.0236149	6.84052e-28	0.059	1.651	1.132
both	Yhomolog	ulcerative colitis	0.264988	2.3348e-59	0.66	21.711	1.132
both	E	rheumatoid arthritis	0.0990915	5.52219e-151	0.288	8.852	2.258
both	Intergenic	rheumatoid arthritis	0.00402671	9.01378e-22	0.012	0.047	2.258
both	NoCall	rheumatoid arthritis	0.0443962	7.84013e-81	0.129	0.261	2.258
both	S	rheumatoid arthritis	0.000950954	0.000531001	0.003	0.017	2.258
both	VE	rheumatoid arthritis	0.0500229	9.81766e-79	0.145	4.075	2.258
both	Yhomolog	rheumatoid arthritis	0.145773	7.72245e-46	0.423	13.921	2.258
both	E	osteoarthritis	0.0907473	7.45338e-102	0.126	3.866	1.823
both	Intergenic	osteoarthritis	0.00384166	1.14447e-15	0.005	0.022	1.823
both	NoCall	osteoarthritis	0.00381997	1.76401e-06	0.005	0.011	1.823
both	S	osteoarthritis	0	0.933406	0	0	1.823
both	VE	osteoarthritis	0.595089	0	0.824	23.118	1.823
both	Yhomolog	osteoarthritis	0.0284668	7.75669e-08	0.039	1.296	1.823
both	E	gout	0.0836255	1.80383e-47	0.136	4.19	0.08
both	Intergenic	gout	0.00315141	3.32976e-07	0.005	0.021	0.08
both	NoCall	gout	0.0592611	5.2473e-40	0.097	0.195	0.08
both	S	gout	0	0.117764	0	0	0.08
both	VE	gout	0.0100153	4.20955e-07	0.016	0.458	0.08
both	Yhomolog	gout	0.457719	7.30972e-52	0.746	24.517	0.08
both	E	other joint disorder	0.00541324	1.02982e-06	0.008	0.243	1.039
both	Intergenic	other joint disorder	0.000879104	0.000348591	0.001	0.005	1.039
both	NoCall	other joint disorder	0.389958	0	0.568	1.148	1.039
both	S	other joint disorder	0.202094	0	0.294	1.85	1.039
both	VE	other joint disorder	0.0264026	1.19239e-27	0.038	1.079	1.039
both	Yhomolog	other joint disorder	0.0616209	1.62013e-13	0.09	2.952	1.039
both	E	diabetic neuropathy/ulcers	0.00959132	1.13797e-07	0.071	2.195	0.4
both	Intergenic	diabetic neuropathy/ulcers	0.0162602	4.50578e-36	0.121	0.489	0.4
both	NoCall	diabetic neuropathy/ulcers	0.0491822	6.59808e-39	0.366	0.74	0.4
both	S	diabetic neuropathy/ulcers	0.0287432	2.71451e-35	0.214	1.345	0.4
both	VE	diabetic neuropathy/ulcers	0.0305762	1.14985e-21	0.228	6.383	0.4
both	Yhomolog	diabetic neuropathy/ulcers	0	0.630294	0	0	0.4
both	E	post-traumatic stress disorder	0	0.200589	0	0	1.008
both	Intergenic	post-traumatic stress disorder	0.0303719	6.61056e-103	0.135	0.546	1.008
both	NoCall	post-traumatic stress disorder	0.00676559	1.17122e-09	0.03	0.061	1.008
both	S	post-traumatic stress disorder	0.0750528	7.9633e-140	0.334	2.096	1.008
both	VE	post-traumatic stress disorder	0.0516571	5.06415e-55	0.23	6.439	1.008
both	Yhomolog	post-traumatic stress disorder	0.0611413	4.97183e-14	0.272	8.934	1.008
both	E	anorexia/bulimia/other eating disorder	0.000861415	0.00429266	0.002	0.063	16.533
both	Intergenic	anorexia/bulimia/other eating disorder	0.0298509	1.93469e-204	0.071	0.287	16.533
both	NoCall	anorexia/bulimia/other eating disorder	0.0087128	5.7202e-23	0.021	0.042	16.533
both	S	anorexia/bulimia/other eating disorder	0.00185813	1.4758e-08	0.004	0.028	16.533
both	VE	anorexia/bulimia/other eating disorder	0.300674	0	0.714	20.031	16.533
both	Yhomolog	anorexia/bulimia/other eating disorder	0.0790299	1.90419e-34	0.188	6.172	16.533
both	E	atrial fibrillation	0.00782259	3.37905e-08	0.02	0.617	0.446
both	Intergenic	atrial fibrillation	0.000636059	0.00424624	0.002	0.007	0.446
both	NoCall	atrial fibrillation	0.0820772	4.76904e-84	0.21	0.425	0.446
both	S	atrial fibrillation	0.0170628	3.41171e-28	0.044	0.275	0.446
both	VE	atrial fibrillation	0.0241463	1.1806e-22	0.062	1.737	0.446
both	Yhomolog	atrial fibrillation	0.258207	1.03004e-45	0.662	21.769	0.446
both	E	emphysema	0.592789	0	0.702	21.592	0.725
both	Intergenic	emphysema	0.0170405	1.11796e-43	0.02	0.082	0.725
both	NoCall	emphysema	0.0153371	3.63708e-15	0.018	0.037	0.725
both	S	emphysema	0.0252286	4.55895e-36	0.03	0.188	0.725
both	VE	emphysema	0.0660183	5.74607e-52	0.078	2.193	0.725
both	Yhomolog	emphysema	0.1279	8.27004e-21	0.151	4.98	0.725
both	E	high cholesterol	0.0450877	3.99226e-09	0.004	0.109	0.737
both	Intergenic	high cholesterol	0.0779595	7.47305e-45	0.006	0.025	0.737
both	NoCall	high cholesterol	11.7785	0	0.929	1.877	0.737
both	S	high cholesterol	0.6731	1.01438e-206	0.053	0.334	0.737
both	VE	high cholesterol	0.103998	1.78538e-19	0.008	0.23	0.737
both	Yhomolog	high cholesterol	0	0.0567985	0	0	0.737
both	E	hiatus hernia	0.0228056	3.75324e-23	0.199	6.117	1.413
both	Intergenic	hiatus hernia	0.00754995	3.89832e-25	0.066	0.266	1.413
both	NoCall	hiatus hernia	0.0301868	3.012e-35	0.263	0.532	1.413
both	S	hiatus hernia	0.0411017	3.71272e-72	0.358	2.253	1.413
both	VE	hiatus hernia	0.00632617	1.34998e-07	0.055	1.547	1.413
both	Yhomolog	hiatus hernia	0.00668636	0.0163218	0.058	1.917	1.413
both	E	sciatica	0.000916308	0.0380835	0.002	0.048	1.083
both	Intergenic	sciatica	0.00424016	5.37108e-16	0.007	0.029	1.083
both	NoCall	sciatica	0.291798	0	0.5	1.009	1.083
both	S	sciatica	0.249427	0	0.427	2.683	1.083
both	VE	sciatica	0	0.953521	0	0	1.083
both	Yhomolog	sciatica	0.0377764	2.535e-09	0.065	2.126	1.083
both	E	psoriatic arthropathy	0.00224408	0.00175627	0.004	0.12	1.028
both	Intergenic	psoriatic arthropathy	0.00876113	3.01024e-29	0.015	0.062	1.028
both	NoCall	psoriatic arthropathy	0.0920711	4.835e-105	0.16	0.324	1.028
both	S	psoriatic arthropathy	0.370185	0	0.645	4.053	1.028
both	VE	psoriatic arthropathy	0.0396932	2.74772e-40	0.069	1.94	1.028
both	Yhomolog	psoriatic arthropathy	0.0609972	2.89244e-13	0.106	3.494	1.028
both	E	cervical spondylosis	0.0228962	2.03861e-33	0.134	4.116	1.775
both	Intergenic	cervical spondylosis	0.0390061	3.72139e-179	0.228	0.922	1.775
both	NoCall	cervical spondylosis	0.000787802	0.0151734	0.005	0.009	1.775
both	S	cervical spondylosis	0.00132924	8.84854e-05	0.008	0.049	1.775
both	VE	cervical spondylosis	0	0.083091	0	0	1.775
both	Yhomolog	cervical spondylosis	0.107064	2.10952e-31	0.626	20.574	1.775
both	E	rheumatic fever	0.0184618	4.04938e-22	0.034	1.046	1.477
both	Intergenic	rheumatic fever	0.00857449	5.16631e-33	0.016	0.064	1.477
both	NoCall	rheumatic fever	0.0256267	3.40881e-35	0.047	0.095	1.477
both	S	rheumatic fever	0.22374	0	0.412	2.589	1.477
both	VE	rheumatic fever	0.00632991	1.07239e-08	0.012	0.327	1.477
both	Yhomolog	rheumatic fever	0.26027	2.39306e-59	0.479	15.758	1.477
both	E	chronic fatigue syndrome	0.00553259	7.46179e-11	0.033	1.017	2.72
both	Intergenic	chronic fatigue syndrome	0.00899021	2.4492e-51	0.054	0.217	2.72
both	NoCall	chronic fatigue syndrome	0.0274182	7.20559e-56	0.164	0.331	2.72
both	S	chronic fatigue syndrome	0.0146409	2.11548e-46	0.088	0.55	2.72
both	VE	chronic fatigue syndrome	0.0435423	5.92383e-76	0.26	7.302	2.72
both	Yhomolog	chronic fatigue syndrome	0.0671247	3.3536e-24	0.401	13.195	2.72
both	E	irregular heart beat	0.0430733	5.39123e-48	0.278	8.554	0.964
both	Intergenic	irregular heart beat	0.0273053	2.54791e-98	0.176	0.713	0.964
both	NoCall	irregular heart beat	0.0201222	3.05448e-27	0.13	0.263	0.964
both	S	irregular heart beat	0.00292463	3.00689e-07	0.019	0.119	0.964
both	VE	irregular heart beat	0.0341392	3.86286e-39	0.22	6.183	0.964
both	Yhomolog	irregular heart beat	0.0272858	2.15698e-07	0.176	5.793	0.964
both	E	svt / supraventricular tachycardia	0.0281405	1.00269e-40	0.054	1.666	1.895
both	Intergenic	svt / supraventricular tachycardia	0.021712	8.53309e-101	0.042	0.169	1.895
both	NoCall	svt / supraventricular tachycardia	0.0919529	1.07173e-151	0.177	0.358	1.895
both	S	svt / supraventricular tachycardia	0.040201	3.93345e-103	0.077	0.486	1.895
both	VE	svt / supraventricular tachycardia	0.244474	0	0.471	13.2	1.895
both	Yhomolog	svt / supraventricular tachycardia	0.0929799	1.59472e-27	0.179	5.885	1.895
both	E	brain haemorrhage	0.0444515	1.67314e-53	0.149	4.576	1.145
both	Intergenic	brain haemorrhage	0.00239162	8.66786e-11	0.008	0.032	1.145
both	NoCall	brain haemorrhage	0.21765	1.83297e-299	0.729	1.472	1.145
both	S	brain haemorrhage	0.00310358	3.8856e-08	0.01	0.065	1.145
both	VE	brain haemorrhage	0.0102352	8.40745e-14	0.034	0.961	1.145
both	Yhomolog	brain haemorrhage	0.0208882	2.3039e-06	0.07	2.299	1.145
both	E	varicose veins	0.0715162	1.11322e-104	0.257	7.908	1.77
both	Intergenic	varicose veins	0.000602091	0.00029171	0.002	0.009	1.77
both	NoCall	varicose veins	0	0.671501	0	0	1.77
both	S	varicose veins	0.0915896	1.53204e-241	0.329	2.07	1.77
both	VE	varicose veins	0.00224404	0.000100748	0.008	0.226	1.77
both	Yhomolog	varicose veins	0.112155	3.95239e-34	0.403	13.258	1.77
both	E	lymphoedema	0.0546683	1.5068e-103	0.147	4.517	5.714
both	Intergenic	lymphoedema	0.0062367	3.97647e-40	0.017	0.068	5.714
both	NoCall	lymphoedema	0.287386	0	0.772	1.56	5.714
both	S	lymphoedema	0.00257102	2.43812e-10	0.007	0.043	5.714
both	VE	lymphoedema	0.013702	8.38197e-28	0.037	1.033	5.714
both	Yhomolog	lymphoedema	0.00760043	0.000309704	0.02	0.671	5.714
both	E	pneumothorax	0.0144808	3.89328e-14	0.119	3.648	0.297
both	Intergenic	pneumothorax	0.0613384	1.1035e-175	0.502	2.031	0.297
both	NoCall	pneumothorax	0.0374207	7.49544e-40	0.307	0.619	0.297
both	S	pneumothorax	0.00188146	0.000230932	0.015	0.097	0.297
both	VE	pneumothorax	0.00694868	1.20727e-07	0.057	1.597	0.297
both	Yhomolog	pneumothorax	0	0.324391	0	0	0.297
both	E	labyrinthitis	0.0757554	5.53645e-121	0.275	8.446	2.176
both	Intergenic	labyrinthitis	0.0604603	0	0.219	0.886	2.176
both	NoCall	labyrinthitis	0.00689677	1.69982e-14	0.025	0.051	2.176
both	S	labyrinthitis	0.0208644	9.58298e-62	0.076	0.475	2.176
both	VE	labyrinthitis	0.111869	4.00342e-181	0.406	11.374	2.176
both	Yhomolog	labyrinthitis	0	0.412788	0	0	2.176
both	E	vertigo	0.00791601	6.47733e-13	0.009	0.271	2.574
both	Intergenic	vertigo	0	0.295932	0	0	2.574
both	NoCall	vertigo	0.00559304	5.13084e-11	0.006	0.013	2.574
both	S	vertigo	0.105846	1.47053e-275	0.118	0.739	2.574
both	VE	vertigo	0.0107448	2.67194e-17	0.012	0.335	2.574
both	Yhomolog	vertigo	0.769858	1.32198e-220	0.855	28.123	2.574
both	E	appendicitis	0.0112767	2.79082e-15	0.051	1.57	1.191
both	Intergenic	appendicitis	0.0295169	4.09319e-119	0.134	0.54	1.191
both	NoCall	appendicitis	0	0.391138	0	0	1.191
both	S	appendicitis	0.0873886	1.4504e-193	0.396	2.486	1.191
both	VE	appendicitis	0.071283	1.86533e-89	0.323	9.048	1.191
both	Yhomolog	appendicitis	0.0214884	1.05851e-06	0.097	3.197	1.191
both	E	anal fissure	0.0364117	3.15009e-41	0.186	5.731	0.809
both	Intergenic	anal fissure	0	0.624269	0	0	0.809
both	NoCall	anal fissure	0.0128534	3.85839e-18	0.066	0.133	0.809
both	S	anal fissure	0.0441262	6.75435e-89	0.226	1.419	0.809
both	VE	anal fissure	0.0275261	3.4769e-32	0.141	3.951	0.809
both	Yhomolog	anal fissure	0.0744839	7.40029e-18	0.381	12.532	0.809
both	E	haemorrhoids / piles	0.00162433	0.010463	0.002	0.048	0.603
both	Intergenic	haemorrhoids / piles	0.0383617	5.72891e-113	0.037	0.15	0.603
both	NoCall	haemorrhoids / piles	0.0246939	2.09685e-27	0.024	0.048	0.603
both	S	haemorrhoids / piles	0.121476	3.97931e-196	0.117	0.738	0.603
both	VE	haemorrhoids / piles	0.0857376	1.1113e-78	0.083	2.325	0.603
both	Yhomolog	haemorrhoids / piles	0.762354	7.45411e-136	0.737	24.233	0.603
both	E	jaundice (unknown cause)	0.0417504	1.23057e-42	0.261	8.035	0.874
both	Intergenic	jaundice (unknown cause)	0.0117851	7.98296e-40	0.074	0.298	0.874
both	NoCall	jaundice (unknown cause)	0.0194169	3.5853e-24	0.122	0.246	0.874
both	S	jaundice (unknown cause)	0.00108385	0.0028967	0.007	0.043	0.874
both	VE	jaundice (unknown cause)	0.0794053	5.4911e-81	0.497	13.938	0.874
both	Yhomolog	jaundice (unknown cause)	0.0063473	0.0169183	0.04	1.306	0.874
both	E	gastroenteritis/dysentry	0.00278214	0.00250995	0.006	0.197	0.938
both	Intergenic	gastroenteritis/dysentry	0.008154	5.6378e-21	0.019	0.076	0.938
both	NoCall	gastroenteritis/dysentry	0.0124337	3.86906e-12	0.029	0.058	0.938
both	S	gastroenteritis/dysentry	0.0556787	1.94615e-74	0.128	0.807	0.938
both	VE	gastroenteritis/dysentry	0.00248261	0.00393584	0.006	0.16	0.938
both	Yhomolog	gastroenteritis/dysentry	0.352316	2.7468e-52	0.812	26.698	0.938
both	E	dyspepsia / indigestion	0.0780564	2.00573e-89	0.079	2.42	1.061
both	Intergenic	dyspepsia / indigestion	0.0101004	3.17381e-39	0.01	0.041	1.061
both	NoCall	dyspepsia / indigestion	0.0648426	9.55075e-88	0.065	0.132	1.061
both	S	dyspepsia / indigestion	0.00341747	1.4472e-08	0.003	0.022	1.061
both	VE	dyspepsia / indigestion	0.535033	0	0.539	15.13	1.061
both	Yhomolog	dyspepsia / indigestion	0.30036	2.34202e-69	0.303	9.956	1.061
both	E	abdominal hernia	0.00285742	0.00375961	0.006	0.179	0.284
both	Intergenic	abdominal hernia	0.070619	1.01831e-150	0.144	0.582	0.284
both	NoCall	abdominal hernia	0.252132	5.89786e-192	0.514	1.038	0.284
both	S	abdominal hernia	0.0251002	4.26561e-31	0.051	0.321	0.284
both	VE	abdominal hernia	0.0199203	1.10394e-14	0.041	1.139	0.284
both	Yhomolog	abdominal hernia	0.120027	4.31541e-17	0.245	8.042	0.284
both	E	umbilical hernia	0.0251997	7.37584e-29	0.113	3.484	0.653
both	Intergenic	umbilical hernia	0.050519	1.60323e-180	0.227	0.918	0.653
both	NoCall	umbilical hernia	0.0182639	6.2147e-25	0.082	0.166	0.653
both	S	umbilical hernia	0.0679105	9.86271e-135	0.305	1.919	0.653
both	VE	umbilical hernia	0.0318702	9.76325e-37	0.143	4.019	0.653
both	Yhomolog	umbilical hernia	0.0286525	1.03828e-07	0.129	4.235	0.653
both	E	inguinal hernia	0.141978	1.56953e-99	0.719	22.115	0.102
both	Intergenic	inguinal hernia	0.0245812	1.14168e-57	0.125	0.503	0.102
both	NoCall	inguinal hernia	0	0.805258	0	0	0.102
both	S	inguinal hernia	0.013635	7.60401e-19	0.069	0.434	0.102
both	VE	inguinal hernia	0.010298	8.30365e-09	0.052	1.463	0.102
both	Yhomolog	inguinal hernia	0.0069454	0.0360037	0.035	1.156	0.102
both	E	cystitis	0.0353841	1.54517e-76	0.468	14.4	9.632
both	Intergenic	cystitis	0.000300371	0.00193904	0.004	0.016	9.632
both	NoCall	cystitis	0.00578518	4.05087e-16	0.077	0.155	9.632
both	S	cystitis	0.018624	1.49837e-73	0.246	1.549	9.632
both	VE	cystitis	0.0122396	3.80503e-28	0.162	4.543	9.632
both	Yhomolog	cystitis	0.00323603	0.012191	0.043	1.408	9.632
both	E	trigemminal neuralgia	0.0458204	8.07852e-67	0.301	9.245	2.66
both	Intergenic	trigemminal neuralgia	0.0214466	4.0583e-102	0.141	0.569	2.66
both	NoCall	trigemminal neuralgia	0.00342214	2.9091e-07	0.022	0.045	2.66
both	S	trigemminal neuralgia	0.00150446	2.36871e-05	0.01	0.062	2.66
both	VE	trigemminal neuralgia	0.0462613	9.33393e-69	0.304	8.513	2.66
both	Yhomolog	trigemminal neuralgia	0.033961	2.83825e-11	0.223	7.325	2.66
both	E	benign / essential tremor	0.117752	4.48855e-106	0.196	6.038	0.91
both	Intergenic	benign / essential tremor	0.00568763	2.43208e-18	0.009	0.038	0.91
both	NoCall	benign / essential tremor	0.00332826	6.39407e-05	0.006	0.011	0.91
both	S	benign / essential tremor	0.0195823	1.91711e-33	0.033	0.205	0.91
both	VE	benign / essential tremor	0.038892	5.87466e-37	0.065	1.819	0.91
both	Yhomolog	benign / essential tremor	0.414514	2.30255e-75	0.691	22.722	0.91
both	E	polio / poliomyelitis	0.00462193	1.99735e-06	0.019	0.569	0.878
both	Intergenic	polio / poliomyelitis	0.0063162	5.95333e-24	0.025	0.102	0.878
both	NoCall	polio / poliomyelitis	0.0126446	1.30555e-17	0.051	0.102	0.878
both	S	polio / poliomyelitis	0.0923971	6.03925e-181	0.37	2.325	0.878
both	VE	polio / poliomyelitis	0.0117576	1.90063e-14	0.047	1.32	0.878
both	Yhomolog	polio / poliomyelitis	0.121997	8.40863e-28	0.489	16.06	0.878
both	E	macular degeneration	0	0.862428	0	0	1.863
both	Intergenic	macular degeneration	0.0400603	5.66002e-170	0.428	1.729	1.863
both	NoCall	macular degeneration	0.00253058	2.89791e-05	0.027	0.055	1.863
both	S	macular degeneration	0.0292804	6.76704e-70	0.313	1.965	1.863
both	VE	macular degeneration	0.00985244	1.74297e-14	0.105	2.95	1.863
both	Yhomolog	macular degeneration	0.0119419	0.000183299	0.127	4.191	1.863
both	E	dry eyes	0.00102569	0.00665841	0.002	0.074	2.994
both	Intergenic	dry eyes	0.195922	0	0.462	1.868	2.994
both	NoCall	dry eyes	0.138456	1.17425e-256	0.326	0.66	2.994
both	S	dry eyes	0.000602006	0.00499349	0.001	0.009	2.994
both	VE	dry eyes	0.0032235	1.18446e-06	0.008	0.213	2.994
both	Yhomolog	dry eyes	0.0849125	2.25184e-28	0.2	6.582	2.994
both	E	iritis	0.0729648	1.56271e-70	0.255	7.854	1.012
both	Intergenic	iritis	0.0436092	3.97763e-137	0.153	0.617	1.012
both	NoCall	iritis	0.0195278	1.81261e-23	0.068	0.138	1.012
both	S	iritis	0.00172057	0.000230328	0.006	0.038	1.012
both	VE	iritis	0	0.480334	0	0	1.012
both	Yhomolog	iritis	0.147878	1.1208e-29	0.518	17.016	1.012
both	E	disc problem	0.0533406	1.25787e-59	0.165	5.064	1.051
both	Intergenic	disc problem	0.000311637	0.0237349	0.001	0.004	1.051
both	NoCall	disc problem	0.00338455	8.25879e-06	0.01	0.021	1.051
both	S	disc problem	0	0.886893	0	0	1.051
both	VE	disc problem	0.0368389	1.54563e-42	0.114	3.19	1.051
both	Yhomolog	disc problem	0.230041	9.47962e-52	0.71	23.348	1.051
both	E	disc degeneration	0.00658992	3.1598e-09	0.013	0.394	1.315
both	Intergenic	disc degeneration	0.0110111	5.96294e-44	0.021	0.087	1.315
both	NoCall	disc degeneration	0.0724156	6.37353e-101	0.141	0.285	1.315
both	S	disc degeneration	0.15064	0	0.293	1.841	1.315
both	VE	disc degeneration	0.0527201	3.41611e-64	0.103	2.876	1.315
both	Yhomolog	disc degeneration	0.220774	4.15559e-53	0.429	14.117	1.315
both	E	back pain	0.0588438	4.48158e-69	0.247	7.583	1.143
both	Intergenic	back pain	0.11912	0	0.499	2.018	1.143
both	NoCall	back pain	0.00296034	1.84999e-05	0.012	0.025	1.143
both	S	back pain	0.0204026	2.36405e-44	0.085	0.537	1.143
both	VE	back pain	0.0284128	6.28322e-35	0.119	3.339	1.143
both	Yhomolog	back pain	0.00891155	0.00221317	0.037	1.228	1.143
both	E	scoliosis	0.0409515	1.00775e-61	0.082	2.522	3.911
both	Intergenic	scoliosis	0.0100181	3.63552e-50	0.02	0.081	3.911
both	NoCall	scoliosis	0.0241466	1.60879e-43	0.048	0.098	3.911
both	S	scoliosis	0	0.649638	0	0	3.911
both	VE	scoliosis	0.0187752	8.48296e-30	0.038	1.055	3.911
both	Yhomolog	scoliosis	0.405426	1.84302e-120	0.812	26.694	3.911
both	E	spinal stenosis	0.00336779	0.000176665	0.005	0.161	1.111
both	Intergenic	spinal stenosis	0.0255457	1.77962e-78	0.04	0.161	1.111
both	NoCall	spinal stenosis	0.281733	2.57012e-303	0.439	0.888	1.111
both	S	spinal stenosis	0.280782	0	0.438	2.751	1.111
both	VE	spinal stenosis	0.044279	6.56171e-43	0.069	1.936	1.111
both	Yhomolog	spinal stenosis	0.0056517	0.0296938	0.009	0.29	1.111
both	E	joint pain	0.0237432	1.81972e-27	0.054	1.648	1.317
both	Intergenic	joint pain	0.081506	1.03835e-291	0.184	0.744	1.317
both	NoCall	joint pain	0.0942909	3.76123e-122	0.213	0.43	1.317
both	S	joint pain	0.0740095	1.18884e-147	0.167	1.05	1.317
both	VE	joint pain	0	0.540304	0	0	1.317
both	Yhomolog	joint pain	0.169539	1.5008e-38	0.383	12.579	1.317
both	E	arthritis (nos)	0.0172592	1.10115e-24	0.105	3.218	1.535
both	Intergenic	arthritis (nos)	0.0228101	1.06759e-101	0.138	0.559	1.535
both	NoCall	arthritis (nos)	0.0365063	4.5072e-59	0.221	0.447	1.535
both	S	arthritis (nos)	0.00655641	1.36681e-17	0.04	0.25	1.535
both	VE	arthritis (nos)	0.0129823	2.59739e-19	0.079	2.207	1.535
both	Yhomolog	arthritis (nos)	0.0688293	4.87696e-20	0.417	13.719	1.535
both	E	plantar fascitis	0.0730917	1.29147e-73	0.284	8.72	1.128
both	Intergenic	plantar fascitis	0.0386881	4.68412e-127	0.15	0.607	1.128
both	NoCall	plantar fascitis	0.022551	6.19475e-28	0.087	0.177	1.128
both	S	plantar fascitis	0.00271315	2.31542e-06	0.011	0.066	1.128
both	VE	plantar fascitis	0.0299644	8.08394e-32	0.116	3.26	1.128
both	Yhomolog	plantar fascitis	0.0907734	1.38399e-19	0.352	11.577	1.128
both	E	carpal tunnel syndrome	0.00430592	2.08975e-07	0.035	1.064	2.602
both	Intergenic	carpal tunnel syndrome	0.0064489	8.50672e-31	0.052	0.209	2.602
both	NoCall	carpal tunnel syndrome	0	0.0629762	0	0	2.602
both	S	carpal tunnel syndrome	0.0641416	4.8142e-161	0.515	3.238	2.602
both	VE	carpal tunnel syndrome	0.00541519	4.11495e-09	0.043	1.22	2.602
both	Yhomolog	carpal tunnel syndrome	0.044188	9.92478e-14	0.355	11.668	2.602
both	E	fibromyalgia	0.00438423	4.53553e-10	0.089	2.752	7.443
both	Intergenic	fibromyalgia	0.00789363	4.02627e-52	0.161	0.651	7.443
both	NoCall	fibromyalgia	0.00898641	3.07163e-22	0.183	0.371	7.443
both	S	fibromyalgia	0.0115421	1.77616e-42	0.236	1.48	7.443
both	VE	fibromyalgia	0.00271074	7.3798e-07	0.055	1.552	7.443
both	Yhomolog	fibromyalgia	0.0134813	9.95734e-07	0.275	9.045	7.443
both	E	dupuytren's contracture	0.22653	6.01535e-170	0.186	5.708	0.308
both	Intergenic	dupuytren's contracture	0.172801	0	0.142	0.572	0.308
both	NoCall	dupuytren's contracture	0.0197725	4.41315e-19	0.016	0.033	0.308
both	S	dupuytren's contracture	0.245116	0	0.201	1.262	0.308
both	VE	dupuytren's contracture	0.0392147	1.54934e-31	0.032	0.901	0.308
both	Yhomolog	dupuytren's contracture	0.517093	8.22882e-79	0.424	13.928	0.308
both	E	neck problem/injury	0.0078694	1.93238e-11	0.028	0.859	1.17
both	Intergenic	neck problem/injury	0.00408447	1.61462e-18	0.014	0.059	1.17
both	NoCall	neck problem/injury	0.0248238	2.34571e-38	0.088	0.178	1.17
both	S	neck problem/injury	0.000446283	0.030895	0.002	0.01	1.17
both	VE	neck problem/injury	0.109427	8.47294e-141	0.388	10.894	1.17
both	Yhomolog	neck problem/injury	0.135061	1.56676e-35	0.479	15.762	1.17
both	E	acne/acne vulgaris	0.00200212	0.00132971	0.007	0.217	1.203
both	Intergenic	acne/acne vulgaris	0.0379573	5.69291e-142	0.134	0.541	1.203
both	NoCall	acne/acne vulgaris	0.00451708	1.62159e-07	0.016	0.032	1.203
both	S	acne/acne vulgaris	0.0185543	9.61059e-40	0.065	0.411	1.203
both	VE	acne/acne vulgaris	0.026131	1.14409e-31	0.092	2.583	1.203
both	Yhomolog	acne/acne vulgaris	0.194614	1.65618e-45	0.686	22.546	1.203
both	E	lichen planus	0.0182676	6.9821e-28	0.041	1.257	2.413
both	Intergenic	lichen planus	0.000209619	0.0331863	0	0.002	2.413
both	NoCall	lichen planus	0.00424969	9.64472e-09	0.01	0.019	2.413
both	S	lichen planus	0.00179138	3.66759e-06	0.004	0.025	2.413
both	VE	lichen planus	0.0481201	5.90498e-72	0.108	3.019	2.413
both	Yhomolog	lichen planus	0.37437	7.09692e-109	0.838	27.533	2.413
both	E	lichen sclerosis	0.00790651	5.28352e-17	0.264	8.105	31.5
both	Intergenic	lichen sclerosis	0.0111022	1.08069e-72	0.37	1.496	31.5
both	NoCall	lichen sclerosis	0.00674515	4.08008e-17	0.225	0.454	31.5
both	S	lichen sclerosis	0	0.436842	0	0	31.5
both	VE	lichen sclerosis	0	0.519396	0	0	31.5
both	Yhomolog	lichen sclerosis	0.0042468	0.00598321	0.142	4.654	31.5
both	E	raynaud's phenomenon/disease	0.0662789	3.52629e-101	0.486	14.941	3.019
both	Intergenic	raynaud's phenomenon/disease	0.000621627	0.000171446	0.005	0.018	3.019
both	NoCall	raynaud's phenomenon/disease	0.01105	2.60423e-21	0.081	0.164	3.019
both	S	raynaud's phenomenon/disease	0.00417218	4.54244e-13	0.031	0.192	3.019
both	VE	raynaud's phenomenon/disease	0.0305529	1.42183e-48	0.224	6.281	3.019
both	Yhomolog	raynaud's phenomenon/disease	0.0237461	1.05065e-08	0.174	5.722	3.019
both	E	food intolerance	0.100322	1.81783e-136	0.687	21.141	2.391
both	Intergenic	food intolerance	0	0.0735131	0	0	2.391
both	NoCall	food intolerance	0.00934307	1.59812e-16	0.064	0.129	2.391
both	S	food intolerance	0.0234231	3.07356e-59	0.161	1.009	2.391
both	VE	food intolerance	0.0128491	2.44386e-19	0.088	2.469	2.391
both	Yhomolog	food intolerance	0	0.205882	0	0	2.391
both	E	urticaria	0.0252097	1.75981e-36	0.093	2.848	1.713
both	Intergenic	urticaria	0.0156281	1.00194e-72	0.057	0.232	1.713
both	NoCall	urticaria	0.038186	7.78823e-64	0.14	0.283	1.713
both	S	urticaria	0.00166523	1.19259e-05	0.006	0.038	1.713
both	VE	urticaria	0.0238731	2.68812e-35	0.088	2.46	1.713
both	Yhomolog	urticaria	0.167611	5.40104e-48	0.616	20.246	1.713
both	E	infectious mononucleosis / glandular fever / epstein barr virus (ebv)	0.0273846	5.41169e-38	0.054	1.676	1.516
both	Intergenic	infectious mononucleosis / glandular fever / epstein barr virus (ebv)	0.000898947	2.22512e-05	0.002	0.007	1.516
both	NoCall	infectious mononucleosis / glandular fever / epstein barr virus (ebv)	0.0465141	2.2502e-74	0.093	0.187	1.516
both	S	infectious mononucleosis / glandular fever / epstein barr virus (ebv)	0	0.570328	0	0	1.516
both	VE	infectious mononucleosis / glandular fever / epstein barr virus (ebv)	0.00976107	7.81533e-15	0.019	0.545	1.516
both	Yhomolog	infectious mononucleosis / glandular fever / epstein barr virus (ebv)	0.418063	2.38051e-112	0.832	27.345	1.516
both	E	measles / morbillivirus	0.0499106	3.66624e-57	0.322	9.899	1.11
both	Intergenic	measles / morbillivirus	0.0254315	8.64653e-95	0.164	0.663	1.11
both	NoCall	measles / morbillivirus	0	0.164721	0	0	1.11
both	S	measles / morbillivirus	0.0131787	1.98177e-28	0.085	0.534	1.11
both	VE	measles / morbillivirus	0.0313337	3.03633e-37	0.202	5.668	1.11
both	Yhomolog	measles / morbillivirus	0.0352034	2.09955e-09	0.227	7.464	1.11
both	E	mumps / epidemic parotitis	0.0185847	8.85176e-23	0.082	2.526	1.036
both	Intergenic	mumps / epidemic parotitis	0.0344605	2.65489e-130	0.152	0.616	1.036
both	NoCall	mumps / epidemic parotitis	0.00228698	0.000180387	0.01	0.02	1.036
both	S	mumps / epidemic parotitis	0.143408	1.06384e-296	0.634	3.983	1.036
both	VE	mumps / epidemic parotitis	0.0275583	1.3167e-33	0.122	3.416	1.036
both	Yhomolog	mumps / epidemic parotitis	0	0.327376	0	0	1.036
both	E	rubella / german measles	0.0247676	1.89259e-34	0.118	3.627	1.669
both	Intergenic	rubella / german measles	0.00522978	1.67389e-24	0.025	0.101	1.669
both	NoCall	rubella / german measles	0.140495	6.75431e-220	0.669	1.352	1.669
both	S	rubella / german measles	0	0.149337	0	0	1.669
both	VE	rubella / german measles	0.0197018	2.86149e-28	0.094	2.631	1.669
both	Yhomolog	rubella / german measles	0.0198392	9.4334e-07	0.094	3.105	1.669
both	E	chickenpox	0.0311751	3.71039e-38	0.105	3.227	1.156
both	Intergenic	chickenpox	0.00729076	7.92057e-30	0.025	0.099	1.156
both	NoCall	chickenpox	0.115917	4.19384e-161	0.39	0.788	1.156
both	S	chickenpox	0.0880502	1.22357e-188	0.296	1.863	1.156
both	VE	chickenpox	0.000947761	0.022931	0.003	0.089	1.156
both	Yhomolog	chickenpox	0.0537089	3.27794e-14	0.181	5.943	1.156
both	E	whooping cough / pertussis	0.0554622	1.75727e-65	0.347	10.665	1.628
both	Intergenic	whooping cough / pertussis	0.0421741	3.1015e-161	0.264	1.066	1.628
both	NoCall	whooping cough / pertussis	0.0322209	1.73208e-45	0.201	0.407	1.628
both	S	whooping cough / pertussis	0	0.555067	0	0	1.628
both	VE	whooping cough / pertussis	0.0139129	5.30686e-18	0.087	2.44	1.628
both	Yhomolog	whooping cough / pertussis	0.0161577	3.64226e-05	0.101	3.321	1.628
both	E	shingles	0	0.324579	0	0	1.246
both	Intergenic	shingles	0.0123381	1.39947e-50	0.06	0.242	1.246
both	NoCall	shingles	0.0137893	3.05715e-21	0.067	0.135	1.246
both	S	shingles	0.00969045	6.38072e-23	0.047	0.295	1.246
both	VE	shingles	0.0247121	5.48179e-32	0.12	3.356	1.246
both	Yhomolog	shingles	0.145976	7.94821e-37	0.707	23.239	1.246
both	E	herpes simplex	0	0.466906	0	0	1.607
both	Intergenic	herpes simplex	0.00422455	2.91708e-21	0.034	0.137	1.607
both	NoCall	herpes simplex	0	0.564188	0	0	1.607
both	S	herpes simplex	0.0909998	1.20657e-233	0.728	4.577	1.607
both	VE	herpes simplex	0.00217523	0.00015867	0.017	0.488	1.607
both	Yhomolog	herpes simplex	0.0275376	2.60425e-09	0.22	7.246	1.607
both	E	hepatitis a	0	0.183149	0	0	1.099
both	Intergenic	hepatitis a	0.0621863	4.60205e-208	0.326	1.316	1.099
both	NoCall	hepatitis a	0.0635798	1.83432e-77	0.333	0.672	1.099
both	S	hepatitis a	0.0495974	6.05101e-93	0.26	1.632	1.099
both	VE	hepatitis a	0.0156766	7.93974e-18	0.082	2.302	1.099
both	Yhomolog	hepatitis a	0	0.414386	0	0	1.099
both	E	mitral regurgitation / incompetence	0.000892715	0.0328149	0.001	0.04	1.296
both	Intergenic	mitral regurgitation / incompetence	0.0525773	3.38218e-194	0.077	0.31	1.296
both	NoCall	mitral regurgitation / incompetence	0.025762	1.2839e-35	0.038	0.076	1.296
both	S	mitral regurgitation / incompetence	0.0115629	3.29549e-25	0.017	0.106	1.296
both	VE	mitral regurgitation / incompetence	0.000738796	0.0498807	0.001	0.03	1.296
both	Yhomolog	mitral regurgitation / incompetence	0.593517	8.67376e-134	0.866	28.483	1.296
both	E	tinnitus / tiniitis	0.0270179	4.06762e-26	0.026	0.798	0.78
both	Intergenic	tinnitus / tiniitis	0.233542	0	0.224	0.907	0.78
both	NoCall	tinnitus / tiniitis	0.193135	8.28207e-207	0.186	0.375	0.78
both	S	tinnitus / tiniitis	0.0091276	1.05835e-16	0.009	0.055	0.78
both	VE	tinnitus / tiniitis	0.0799391	2.72589e-75	0.077	2.154	0.78
both	Yhomolog	tinnitus / tiniitis	0.498285	1.04074e-91	0.479	15.736	0.78
both	E	tonsiltis	0.0160032	3.98817e-22	0.131	4.018	1.279
both	Intergenic	tonsiltis	0.012096	1.20857e-52	0.099	0.399	1.279
both	NoCall	tonsiltis	0.0267124	5.54656e-42	0.218	0.441	1.279
both	S	tonsiltis	0.00328194	3.31397e-09	0.027	0.168	1.279
both	VE	tonsiltis	0.0495247	3.74366e-66	0.404	11.341	1.279
both	Yhomolog	tonsiltis	0.0148624	3.02872e-05	0.121	3.989	1.279
both	E	constipation	0.00525289	4.92477e-10	0.321	9.885	3.152
both	Intergenic	constipation	0.00609162	4.61972e-34	0.373	1.507	3.152
both	NoCall	constipation	0.000492573	0.0384343	0.03	0.061	3.152
both	S	constipation	0	0.644289	0	0	3.152
both	VE	constipation	0.00172761	0.00031389	0.106	2.965	3.152
both	Yhomolog	constipation	0.00277693	0.0429269	0.17	5.587	3.152
both	E	bowel / intestinal obstruction	0.0887129	6.55931e-83	0.328	10.09	1.106
both	Intergenic	bowel / intestinal obstruction	0.0141762	1.39857e-44	0.052	0.212	1.106
both	NoCall	bowel / intestinal obstruction	0.0143807	3.14116e-17	0.053	0.107	1.106
both	S	bowel / intestinal obstruction	0.112325	1.01124e-188	0.415	2.611	1.106
both	VE	bowel / intestinal obstruction	0.040789	7.43842e-40	0.151	4.231	1.106
both	Yhomolog	bowel / intestinal obstruction	0	0.405022	0	0	1.106
both	E	rectal prolapse	0.00963256	1.99079e-20	0.074	2.281	12.364
both	Intergenic	rectal prolapse	0	0.0599999	0	0	12.364
both	NoCall	rectal prolapse	0.0696527	3.84834e-161	0.536	1.083	12.364
both	S	rectal prolapse	0.0186399	8.48713e-68	0.144	0.902	12.364
both	VE	rectal prolapse	0.00208788	1.32659e-05	0.016	0.451	12.364
both	Yhomolog	rectal prolapse	0.0298705	2.87993e-13	0.23	7.561	12.364
both	E	nephritis	0.033279	1.61983e-42	0.015	0.47	1.457
both	Intergenic	nephritis	0.00575691	5.45681e-25	0.003	0.011	1.457
both	NoCall	nephritis	0.0295233	1.88866e-44	0.014	0.027	1.457
both	S	nephritis	0.00109085	0.000831819	0.001	0.003	1.457
both	VE	nephritis	0.0140182	3.28332e-19	0.006	0.181	1.457
both	Yhomolog	nephritis	2.09422	0	0.962	31.613	1.457
both	E	thyroid goitre	0.0181284	1.07651e-35	0.188	5.776	7.457
both	Intergenic	thyroid goitre	0.00133265	8.14956e-10	0.014	0.056	7.457
both	NoCall	thyroid goitre	0.00636765	9.61168e-16	0.066	0.133	7.457
both	S	thyroid goitre	0.00561178	7.17935e-21	0.058	0.365	7.457
both	VE	thyroid goitre	0.00280777	7.14518e-07	0.029	0.816	7.457
both	Yhomolog	thyroid goitre	0.0622717	4.4533e-25	0.645	21.21	7.457
both	E	blepharitis / eyelid infection	0.00195263	0.00329793	0.005	0.158	1.381
both	Intergenic	blepharitis / eyelid infection	0.135962	0	0.358	1.447	1.381
both	NoCall	blepharitis / eyelid infection	0.0016743	0.00310992	0.004	0.009	1.381
both	S	blepharitis / eyelid infection	0.235366	0	0.62	3.895	1.381
both	VE	blepharitis / eyelid infection	0.00479281	3.32651e-06	0.013	0.354	1.381
both	Yhomolog	blepharitis / eyelid infection	0	0.174597	0	0	1.381
both	E	stress	0.0504752	5.26114e-57	0.229	7.057	1.338
both	Intergenic	stress	0.00664253	1.0079e-25	0.03	0.122	1.338
both	NoCall	stress	0.0995107	4.17552e-130	0.452	0.914	1.338
both	S	stress	0.0303451	2.50676e-62	0.138	0.867	1.338
both	VE	stress	0.0329753	1.39549e-38	0.15	4.205	1.338
both	Yhomolog	stress	0	0.116089	0	0	1.338
both	E	insomnia	0.00178312	0.000626736	0.008	0.259	2.278
both	Intergenic	insomnia	0.0179585	1.93539e-86	0.085	0.343	2.278
both	NoCall	insomnia	0	0.440353	0	0	2.278
both	S	insomnia	0.0267737	1.37933e-71	0.127	0.795	2.278
both	VE	insomnia	0.158036	1.7003e-231	0.747	20.951	2.278
both	Yhomolog	insomnia	0.00700699	0.00241511	0.033	1.089	2.278
both	E	osteopenia	0.0456508	3.39581e-102	0.182	5.588	12.457
both	Intergenic	osteopenia	0.0212239	1.28562e-155	0.084	0.342	12.457
both	NoCall	osteopenia	0.0289188	6.22195e-77	0.115	0.233	12.457
both	S	osteopenia	0.0329487	7.14732e-134	0.131	0.824	12.457
both	VE	osteopenia	0.0439043	2.71934e-100	0.175	4.901	12.457
both	Yhomolog	osteopenia	0.0785847	1.95749e-36	0.313	10.283	12.457
both	E	tendonitis / tendinitis / tenosynovitis	0	0.477172	0	0	1.351
both	Intergenic	tendonitis / tendinitis / tenosynovitis	0.0268139	9.26179e-99	0.27	1.093	1.351
both	NoCall	tendonitis / tendinitis / tenosynovitis	0	0.163692	0	0	1.351
both	S	tendonitis / tendinitis / tenosynovitis	0.0575264	9.26235e-117	0.58	3.646	1.351
both	VE	tendonitis / tendinitis / tenosynovitis	0.0148149	2.76061e-18	0.149	4.191	1.351
both	Yhomolog	tendonitis / tendinitis / tenosynovitis	0	0.459945	0	0	1.351
both	E	bursitis	0.0488353	1.60441e-70	0.081	2.478	3
both	Intergenic	bursitis	0.0186537	2.31329e-88	0.031	0.124	3
both	NoCall	bursitis	0.119429	9.90696e-200	0.197	0.398	3
both	S	bursitis	0.00951606	3.45976e-26	0.016	0.099	3
both	VE	bursitis	0.0119083	8.27614e-19	0.02	0.551	3
both	Yhomolog	bursitis	0.397746	8.70236e-114	0.656	21.575	3
both	E	tennis elbow / lateral epicondylitis	0.00885487	6.28409e-09	0.056	1.71	1.018
both	Intergenic	tennis elbow / lateral epicondylitis	0.00786445	2.71055e-23	0.049	0.2	1.018
both	NoCall	tennis elbow / lateral epicondylitis	0.112783	2.79779e-112	0.708	1.43	1.018
both	S	tennis elbow / lateral epicondylitis	0.00444745	2.69963e-08	0.028	0.175	1.018
both	VE	tennis elbow / lateral epicondylitis	0.0144544	6.59806e-14	0.091	2.545	1.018
both	Yhomolog	tennis elbow / lateral epicondylitis	0.0108911	0.00393722	0.068	2.248	1.018
both	E	cellulitis	0	0.532303	0	0	0.679
both	Intergenic	cellulitis	0.0331193	1.62675e-110	0.181	0.731	0.679
both	NoCall	cellulitis	0.0862546	3.78163e-103	0.471	0.951	0.679
both	S	cellulitis	0.00228569	1.27157e-05	0.012	0.078	0.679
both	VE	cellulitis	0.0184706	1.71382e-20	0.101	2.827	0.679
both	Yhomolog	cellulitis	0.0430902	3.38436e-10	0.235	7.732	0.679
both	E	fracture skull / head	0.237107	5.78813e-197	0.472	14.514	0.39
both	Intergenic	fracture skull / head	0.0181356	3.51355e-51	0.036	0.146	0.39
both	NoCall	fracture skull / head	0.147359	3.91429e-145	0.293	0.593	0.39
both	S	fracture skull / head	0.0168578	3.87408e-27	0.034	0.211	0.39
both	VE	fracture skull / head	0.0743114	2.36855e-64	0.148	4.149	0.39
both	Yhomolog	fracture skull / head	0.00862205	0.010555	0.017	0.564	0.39
both	E	fracture jaw	0	0.679801	0	0	0.248
both	Intergenic	fracture jaw	0.0589086	9.35281e-139	0.125	0.506	0.248
both	NoCall	fracture jaw	0.0110866	7.46191e-11	0.024	0.048	0.248
both	S	fracture jaw	0.013198	1.05414e-18	0.028	0.176	0.248
both	VE	fracture jaw	0.0362796	6.87633e-28	0.077	2.163	0.248
both	Yhomolog	fracture jaw	0.350968	2.01975e-51	0.746	24.527	0.248
both	E	fracture nose	0.00603799	6.91564e-07	0.017	0.515	0.336
both	Intergenic	fracture nose	0.0037954	8.8227e-13	0.011	0.043	0.336
both	NoCall	fracture nose	0.12235	4.38644e-130	0.34	0.686	0.336
both	S	fracture nose	0.058816	3.94988e-97	0.163	1.026	0.336
both	VE	fracture nose	0.0779644	1.64435e-72	0.216	6.069	0.336
both	Yhomolog	fracture nose	0.0913329	5.66884e-18	0.253	8.334	0.336
both	E	fracture face / orbit / eye socket	0	0.674909	0	0	0.238
both	Intergenic	fracture face / orbit / eye socket	0.0150561	2.02263e-34	0.04	0.162	0.238
both	NoCall	fracture face / orbit / eye socket	0.0528057	9.18708e-43	0.141	0.285	0.238
both	S	fracture face / orbit / eye socket	0.0402365	5.09372e-50	0.107	0.675	0.238
both	VE	fracture face / orbit / eye socket	0.113337	9.9758e-78	0.303	8.485	0.238
both	Yhomolog	fracture face / orbit / eye socket	0.153174	6.86321e-22	0.409	13.443	0.238
both	E	fracture clavicle / collar bone	0	0.149992	0	0	0.305
both	Intergenic	fracture clavicle / collar bone	0.0588856	3.85566e-154	0.115	0.466	0.305
both	NoCall	fracture clavicle / collar bone	0.144397	1.52351e-135	0.283	0.571	0.305
both	S	fracture clavicle / collar bone	0.178355	1.69449e-256	0.349	2.194	0.305
both	VE	fracture clavicle / collar bone	0.0920001	1.63851e-75	0.18	5.051	0.305
both	Yhomolog	fracture clavicle / collar bone	0.0372284	2.16656e-07	0.073	2.396	0.305
both	E	fracture shoulder / scapula	0.0272377	1.04615e-24	0.058	1.783	0.597
both	Intergenic	fracture shoulder / scapula	0.0529285	1.10211e-148	0.113	0.455	0.597
both	NoCall	fracture shoulder / scapula	0.343413	0	0.731	1.477	0.597
both	S	fracture shoulder / scapula	0.0438584	3.33479e-69	0.093	0.587	0.597
both	VE	fracture shoulder / scapula	0.00236869	0.00223863	0.005	0.141	0.597
both	Yhomolog	fracture shoulder / scapula	0	0.377333	0	0	0.597
both	E	fracture upper arm / humerus / elbow	0.0280432	4.06302e-29	0.067	2.053	0.789
both	Intergenic	fracture upper arm / humerus / elbow	0.0106525	4.64237e-36	0.025	0.103	0.789
both	NoCall	fracture upper arm / humerus / elbow	0.330132	0	0.786	1.588	0.789
both	S	fracture upper arm / humerus / elbow	0	0.30686	0	0	0.789
both	VE	fracture upper arm / humerus / elbow	0.0390523	1.21263e-40	0.093	2.607	0.789
both	Yhomolog	fracture upper arm / humerus / elbow	0.0122518	0.000921784	0.029	0.959	0.789
both	E	fracture forearm / wrist	0.0700476	6.57292e-71	0.239	7.359	0.655
both	Intergenic	fracture forearm / wrist	0.0668689	7.77213e-219	0.228	0.924	0.655
both	NoCall	fracture forearm / wrist	0.0224742	5.95432e-28	0.077	0.155	0.655
both	S	fracture forearm / wrist	0	0.515418	0	0	0.655
both	VE	fracture forearm / wrist	0	0.656076	0	0	0.655
both	Yhomolog	fracture forearm / wrist	0.13333	4.06658e-28	0.455	14.974	0.655
both	E	fracture radius	0.0137475	1.36628e-13	0.009	0.284	0.549
both	Intergenic	fracture radius	0.0253895	1.71884e-74	0.017	0.069	0.549
both	NoCall	fracture radius	0.00486528	1.72435e-06	0.003	0.007	0.549
both	S	fracture radius	0.0532988	3.83219e-86	0.036	0.225	0.549
both	VE	fracture radius	0.00288198	0.000621964	0.002	0.054	0.549
both	Yhomolog	fracture radius	1.38828	2.31902e-242	0.933	30.663	0.549
both	E	fracture ulna	0.0104487	2.66716e-09	0.049	1.505	0.47
both	Intergenic	fracture ulna	0.0730319	2.36992e-179	0.342	1.383	0.47
both	NoCall	fracture ulna	0.0195728	8.77761e-19	0.092	0.185	0.47
both	S	fracture ulna	0.0310006	1.43911e-43	0.145	0.912	0.47
both	VE	fracture ulna	0	0.317915	0	0	0.47
both	Yhomolog	fracture ulna	0.0794883	2.05438e-13	0.372	12.238	0.47
both	E	fracture wrist / colles fracture	0.00874319	7.59699e-11	0.045	1.373	1.012
both	Intergenic	fracture wrist / colles fracture	0.0681799	1.55614e-238	0.348	1.407	1.012
both	NoCall	fracture wrist / colles fracture	0.0407535	1.29565e-52	0.208	0.42	1.012
both	S	fracture wrist / colles fracture	0.0512215	2.30106e-100	0.261	1.643	1.012
both	VE	fracture wrist / colles fracture	0.00247304	0.00047233	0.013	0.354	1.012
both	Yhomolog	fracture wrist / colles fracture	0.024526	1.07006e-06	0.125	4.116	1.012
both	E	fracture hand	0.608949	0	0.692	21.268	0.446
both	Intergenic	fracture hand	0.0290581	1.65335e-82	0.033	0.133	0.446
both	NoCall	fracture hand	0.0166239	3.06435e-18	0.019	0.038	0.446
both	S	fracture hand	0.13937	2.79127e-215	0.158	0.995	0.446
both	VE	fracture hand	0.0865451	3.91529e-76	0.098	2.757	0.446
both	Yhomolog	fracture hand	0	0.376007	0	0	0.446
both	E	fracture finger	0.17286	4.31082e-131	0.172	5.298	0.359
both	Intergenic	fracture finger	0.0208668	2.27302e-53	0.021	0.084	0.359
both	NoCall	fracture finger	0.027994	1.61023e-26	0.028	0.056	0.359
both	S	fracture finger	0.00340074	3.8911e-06	0.003	0.021	0.359
both	VE	fracture finger	0.704887	0	0.702	19.701	0.359
both	Yhomolog	fracture finger	0.0734686	1.15128e-12	0.073	2.407	0.359
both	E	fracture rib	0.00983906	6.42548e-09	0.136	4.172	0.311
both	Intergenic	fracture rib	0.0294096	3.27243e-74	0.405	1.639	0.311
both	NoCall	fracture rib	0.00904142	1.47668e-09	0.125	0.252	0.311
both	S	fracture rib	0.024237	8.64183e-35	0.334	2.1	0.311
both	VE	fracture rib	0	0.127343	0	0	0.311
both	Yhomolog	fracture rib	0	0.869036	0	0	0.311
both	E	fracture vertebra / crush fracture / vertebral collapse	0	0.277827	0	0	0.848
both	Intergenic	fracture vertebra / crush fracture / vertebral collapse	0.0666701	2.47653e-231	0.555	2.244	0.848
both	NoCall	fracture vertebra / crush fracture / vertebral collapse	0.021694	1.38526e-28	0.181	0.365	0.848
both	S	fracture vertebra / crush fracture / vertebral collapse	0	0.116857	0	0	0.848
both	VE	fracture vertebra / crush fracture / vertebral collapse	0.0231963	1.56634e-26	0.193	5.416	0.848
both	Yhomolog	fracture vertebra / crush fracture / vertebral collapse	0.00857024	0.00408698	0.071	2.345	0.848
both	E	fracture pelvis	0.0605131	6.77078e-51	0.182	5.604	0.826
both	Intergenic	fracture pelvis	0.0744267	1.89665e-200	0.224	0.906	0.826
both	NoCall	fracture pelvis	0.0114519	1.30232e-12	0.034	0.07	0.826
both	S	fracture pelvis	0.134536	2.52596e-200	0.405	2.546	0.826
both	VE	fracture pelvis	0.0199436	3.27997e-18	0.06	1.684	0.826
both	Yhomolog	fracture pelvis	0.0311991	1.41707e-06	0.094	3.089	0.826
both	E	fracture neck of femur / hip	0.00188033	0.00511511	0.008	0.25	0.824
both	Intergenic	fracture neck of femur / hip	0.0584508	1.40557e-176	0.253	1.022	0.824
both	NoCall	fracture neck of femur / hip	0.0211016	2.19346e-24	0.091	0.184	0.824
both	S	fracture neck of femur / hip	0.00456249	3.8729e-09	0.02	0.124	0.824
both	VE	fracture neck of femur / hip	0.0475615	7.04311e-46	0.206	5.767	0.824
both	Yhomolog	fracture neck of femur / hip	0.0977521	1.66836e-19	0.423	13.893	0.824
both	E	fracture shaft of femur	0.00159831	0.0151586	0.004	0.136	0.373
both	Intergenic	fracture shaft of femur	0	0.406863	0	0	0.373
both	NoCall	fracture shaft of femur	0.270427	1.11287e-257	0.748	1.511	0.373
both	S	fracture shaft of femur	0.0141288	1.83239e-22	0.039	0.246	0.373
both	VE	fracture shaft of femur	0.00428225	5.9513e-05	0.012	0.332	0.373
both	Yhomolog	fracture shaft of femur	0.0711966	4.06436e-13	0.197	6.472	0.373
both	E	fracture patella / knee	0.146438	1.94089e-117	0.556	17.093	0.669
both	Intergenic	fracture patella / knee	0	0.0640995	0	0	0.669
both	NoCall	fracture patella / knee	0.0933924	6.26417e-89	0.354	0.716	0.669
both	S	fracture patella / knee	0.00127356	0.00369796	0.005	0.03	0.669
both	VE	fracture patella / knee	0.00415389	8.83503e-05	0.016	0.442	0.669
both	Yhomolog	fracture patella / knee	0.0182039	0.000276163	0.069	2.272	0.669
both	E	fracture lower leg / ankle	0.00346348	0.000134273	0.007	0.215	0.687
both	Intergenic	fracture lower leg / ankle	0.0562598	1.03736e-171	0.114	0.459	0.687
both	NoCall	fracture lower leg / ankle	0.389547	0	0.787	1.589	0.687
both	S	fracture lower leg / ankle	0.0206439	2.44412e-36	0.042	0.262	0.687
both	VE	fracture lower leg / ankle	0.0150272	9.5395e-16	0.03	0.851	0.687
both	Yhomolog	fracture lower leg / ankle	0.010264	0.00326363	0.021	0.681	0.687
both	E	fracture tibia	0.00376309	0.000119938	0.011	0.329	0.449
both	Intergenic	fracture tibia	0.0161685	1.66452e-47	0.046	0.186	0.449
both	NoCall	fracture tibia	0.0706611	2.89828e-73	0.201	0.406	0.449
both	S	fracture tibia	0.024907	1.01263e-40	0.071	0.445	0.449
both	VE	fracture tibia	0.0519427	3.36386e-47	0.148	4.146	0.449
both	Yhomolog	fracture tibia	0.183977	2.35676e-33	0.524	17.211	0.449
both	E	fracture fibula	0.0230535	1.05846e-22	0.014	0.445	0.564
both	Intergenic	fracture fibula	0.0201331	3.45143e-62	0.013	0.051	0.564
both	NoCall	fracture fibula	0.16889	1.13855e-182	0.106	0.214	0.564
both	S	fracture fibula	0.00134348	0.00138737	0.001	0.005	0.564
both	VE	fracture fibula	0.0543471	3.29637e-52	0.034	0.957	0.564
both	Yhomolog	fracture fibula	1.32423	3.86682e-242	0.832	27.346	0.564
both	E	fracture foot	0.00162487	0.00309537	0.019	0.583	0.971
both	Intergenic	fracture foot	0.0090753	6.22637e-37	0.106	0.428	0.971
both	NoCall	fracture foot	0.0447038	9.57418e-64	0.522	1.054	0.971
both	S	fracture foot	0	0.606576	0	0	0.971
both	VE	fracture foot	0.00194458	0.00108199	0.023	0.636	0.971
both	Yhomolog	fracture foot	0.0283715	3.17403e-08	0.331	10.881	0.971
both	E	fracture metatarsal	0	0.197666	0	0	1.115
both	Intergenic	fracture metatarsal	0.00808877	8.71575e-28	0.038	0.155	1.115
both	NoCall	fracture metatarsal	0	0.953085	0	0	1.115
both	S	fracture metatarsal	0.0240658	1.33161e-44	0.114	0.716	1.115
both	VE	fracture metatarsal	0.0323123	6.33775e-34	0.153	4.292	1.115
both	Yhomolog	fracture metatarsal	0.146665	2.03748e-30	0.695	22.838	1.115
both	E	fracture toe	0.03294	4.49378e-33	0.264	8.119	0.845
both	Intergenic	fracture toe	0.000322404	0.0313138	0.003	0.01	0.845
both	NoCall	fracture toe	0.0428677	6.9873e-50	0.344	0.694	0.845
both	S	fracture toe	0.0172806	1.01769e-31	0.138	0.87	0.845
both	VE	fracture toe	0.0265924	1.56824e-27	0.213	5.978	0.845
both	Yhomolog	fracture toe	0.00476675	0.0413697	0.038	1.256	0.845
both	E	septicaemia / sepsis	0.190809	2.6915e-190	0.876	26.928	0.844
both	Intergenic	septicaemia / sepsis	0.000394421	0.0150298	0.002	0.007	0.844
both	NoCall	septicaemia / sepsis	0.00460254	6.72014e-07	0.021	0.043	0.844
both	S	septicaemia / sepsis	0.00170799	0.000168253	0.008	0.049	0.844
both	VE	septicaemia / sepsis	0.0110617	8.05004e-13	0.051	1.424	0.844
both	Yhomolog	septicaemia / sepsis	0.00934186	0.00354761	0.043	1.409	0.844
both	E	rosacea	0.0608697	1.5437e-76	0.18	5.549	1.266
both	Intergenic	rosacea	0.0273909	1.16579e-112	0.081	0.328	1.266
both	NoCall	rosacea	0	0.0812189	0	0	1.266
both	S	rosacea	0.103082	5.51508e-232	0.306	1.92	1.266
both	VE	rosacea	0.109611	6.77567e-139	0.325	9.112	1.266
both	Yhomolog	rosacea	0.0364146	1.44898e-10	0.108	3.549	1.266
both	E	vitiligo	0.0137589	1.74583e-16	0.031	0.966	1.357
both	Intergenic	vitiligo	0.0526072	6.23011e-188	0.12	0.486	1.357
both	NoCall	vitiligo	0.00927062	2.01e-13	0.021	0.043	1.357
both	S	vitiligo	0.0330939	1.08613e-66	0.076	0.475	1.357
both	VE	vitiligo	0.139455	1.90099e-154	0.318	8.93	1.357
both	Yhomolog	vitiligo	0.18981	1.1302e-42	0.433	14.247	1.357
both	E	allergy to house dust mite	0.0077706	3.87949e-10	0.022	0.682	1.415
both	Intergenic	allergy to house dust mite	0.0723467	4.28877e-263	0.206	0.835	1.415
both	NoCall	allergy to house dust mite	0.0011991	0.00754898	0.003	0.007	1.415
both	S	allergy to house dust mite	0.227079	0	0.648	4.072	1.415
both	VE	allergy to house dust mite	0.0420457	6.30465e-49	0.12	3.365	1.415
both	Yhomolog	allergy to house dust mite	0	0.972035	0	0	1.415
both	E	scarlet fever / scarlatina	0.0023621	0.000508284	0.009	0.29	1.032
both	Intergenic	scarlet fever / scarlatina	0	0.135346	0	0	1.032
both	NoCall	scarlet fever / scarlatina	0.0564661	4.07104e-76	0.226	0.456	1.032
both	S	scarlet fever / scarlatina	0.0857545	8.4783e-176	0.343	2.153	1.032
both	VE	scarlet fever / scarlatina	0.105734	6.67593e-122	0.422	11.847	1.032
both	Yhomolog	scarlet fever / scarlatina	0	0.0673017	0	0	1.032
both	E	benign neuroma	0.0165052	3.49258e-22	0.084	2.594	2.068
both	Intergenic	benign neuroma	0	0.468089	0	0	2.068
both	NoCall	benign neuroma	0	0.279955	0	0	2.068
both	S	benign neuroma	0.0517579	1.35885e-118	0.264	1.662	2.068
both	VE	benign neuroma	0.0266211	1.9911e-35	0.136	3.815	2.068
both	Yhomolog	benign neuroma	0.100811	9.00185e-27	0.515	16.936	2.068
both	E	unclassifiable	0	0.579423	0	0	1.251
both	Intergenic	unclassifiable	0.022213	7.57361e-90	0.156	0.632	1.251
both	NoCall	unclassifiable	0.0203184	1.28164e-30	0.143	0.289	1.251
both	S	unclassifiable	0	0.930444	0	0	1.251
both	VE	unclassifiable	0.0134324	3.52249e-18	0.095	2.651	1.251
both	Yhomolog	unclassifiable	0.0861483	1.75606e-22	0.606	19.929	1.251
female	E	hypertension	0.00988198	1.35606e-08	0.004	0.128	0.882
female	Intergenic	hypertension	0.00117115	0.000383891	0	0.002	0.882
female	NoCall	hypertension	1.15713	0	0.486	0.982	0.882
female	S	hypertension	0.431129	0	0.181	1.138	0.882
female	VE	hypertension	0.0453028	1.17565e-34	0.019	0.534	0.882
female	Yhomolog	hypertension	0.736707	1.22264e-106	0.309	10.171	0.882
female	E	heart/cardiac problem	0.118493	1.71397e-128	0.056	1.721	0.943
female	Intergenic	heart/cardiac problem	0.0163186	1.91886e-59	0.008	0.031	0.943
female	NoCall	heart/cardiac problem	0.0429533	4.18083e-56	0.02	0.041	0.943
female	S	heart/cardiac problem	0.000871291	0.00520368	0	0.003	0.943
female	VE	heart/cardiac problem	0.00415166	5.0858e-06	0.002	0.055	0.943
female	Yhomolog	heart/cardiac problem	1.93465	0	0.914	30.038	0.943
female	E	peripheral vascular disease	0.0206984	2.23723e-27	0.041	1.262	1.645
female	Intergenic	peripheral vascular disease	0.0199894	2.3208e-83	0.04	0.16	1.645
female	NoCall	peripheral vascular disease	0.188071	1.54724e-275	0.373	0.753	1.645
female	S	peripheral vascular disease	0.0389875	9.81149e-90	0.077	0.486	1.645
female	VE	peripheral vascular disease	0.0357958	5.52369e-47	0.071	1.99	1.645
female	Yhomolog	peripheral vascular disease	0.200948	1.33036e-51	0.398	13.095	1.645
female	E	essential hypertension	0.045067	6.01009e-49	0.505	15.545	0.985
female	Intergenic	essential hypertension	0.0137126	3.98866e-49	0.154	0.622	0.985
female	NoCall	essential hypertension	0.00444562	5.18858e-07	0.05	0.101	0.985
female	S	essential hypertension	0.0208958	1.14706e-41	0.234	1.473	0.985
female	VE	essential hypertension	0.00503876	6.81032e-07	0.057	1.585	0.985
female	Yhomolog	essential hypertension	0	0.665234	0	0	0.985
female	E	gestational hypertension/pre-eclampsia	0.0033973	1.23823e-05	0.019	0.592	673.5
female	Intergenic	gestational hypertension/pre-eclampsia	0.0280923	3.03331e-115	0.159	0.644	673.5
female	NoCall	gestational hypertension/pre-eclampsia	0.0404978	2.12163e-60	0.23	0.464	673.5
female	S	gestational hypertension/pre-eclampsia	0.0204429	1.6887e-47	0.116	0.729	673.5
female	VE	gestational hypertension/pre-eclampsia	0.0287088	1.10577e-37	0.163	4.566	673.5
female	Yhomolog	gestational hypertension/pre-eclampsia	0.0552103	3.14975e-15	0.313	10.293	673.5
female	E	angina	0.0213739	2.64719e-26	0.115	3.535	0.465
female	Intergenic	angina	0	0.663802	0	0	0.465
female	NoCall	angina	0.0444891	4.07712e-62	0.239	0.483	0.465
female	S	angina	0.0974575	2.41165e-205	0.524	3.294	0.465
female	VE	angina	0.00886014	5.19031e-12	0.048	1.336	0.465
female	Yhomolog	angina	0.0137584	0.000138849	0.074	2.433	0.465
female	E	heart attack/myocardial infarction	0.0387742	9.30152e-46	0.071	2.186	0.23
female	Intergenic	heart attack/myocardial infarction	0.0317107	3.08352e-120	0.058	0.235	0.23
female	NoCall	heart attack/myocardial infarction	0.0219597	3.59919e-31	0.04	0.081	0.23
female	S	heart attack/myocardial infarction	0.109836	3.48828e-228	0.201	1.265	0.23
female	VE	heart attack/myocardial infarction	0.0767205	1.86452e-90	0.141	3.944	0.23
female	Yhomolog	heart attack/myocardial infarction	0.266557	2.58399e-62	0.489	16.063	0.23
female	E	heart arrhythmia	0.0166376	5.44241e-23	0.041	1.275	0.983
female	Intergenic	heart arrhythmia	0.0341406	2.19114e-145	0.085	0.344	0.983
female	NoCall	heart arrhythmia	0.0091888	1.54894e-15	0.023	0.046	0.983
female	S	heart arrhythmia	0.00611426	6.30061e-16	0.015	0.096	0.983
female	VE	heart arrhythmia	0.063838	6.41213e-85	0.159	4.46	0.983
female	Yhomolog	heart arrhythmia	0.271527	3.10116e-71	0.676	22.236	0.983
female	E	heart valve problem/heart murmur	0.0585843	5.36904e-73	0.145	4.46	1.526
female	Intergenic	heart valve problem/heart murmur	0.00365696	2.35472e-16	0.009	0.037	1.526
female	NoCall	heart valve problem/heart murmur	0.154407	9.79826e-223	0.382	0.772	1.526
female	S	heart valve problem/heart murmur	0.0384902	4.35405e-87	0.095	0.599	1.526
female	VE	heart valve problem/heart murmur	0.0172874	3.53251e-23	0.043	1.2	1.526
female	Yhomolog	heart valve problem/heart murmur	0.131492	8.49602e-34	0.326	10.702	1.526
female	E	stroke	0.00891959	1.99946e-10	0.006	0.19	0.652
female	Intergenic	stroke	0.0253115	2.49556e-84	0.018	0.071	0.652
female	NoCall	stroke	1.12681	0	0.78	1.575	0.652
female	S	stroke	0.148163	4.86596e-268	0.103	0.644	0.652
female	VE	stroke	0.00415219	1.16737e-05	0.003	0.081	0.652
female	Yhomolog	stroke	0.132017	6.53522e-28	0.091	3.003	0.652
female	E	transient ischaemic attack (tia)	0.138636	9.96062e-167	0.216	6.653	0.764
female	Intergenic	transient ischaemic attack (tia)	0.00532342	1.11829e-22	0.008	0.034	0.764
female	NoCall	transient ischaemic attack (tia)	0.00152574	0.00169436	0.002	0.005	0.764
female	S	transient ischaemic attack (tia)	0.0218855	2.15234e-49	0.034	0.215	0.764
female	VE	transient ischaemic attack (tia)	0.0340308	3.47143e-43	0.053	1.489	0.764
female	Yhomolog	transient ischaemic attack (tia)	0.4394	1.30522e-106	0.686	22.543	0.764
female	E	subarachnoid haemorrhage	0.0119334	2.84516e-15	0.038	1.176	1.213
female	Intergenic	subarachnoid haemorrhage	0.0131459	3.28874e-51	0.042	0.17	1.213
female	NoCall	subarachnoid haemorrhage	0.121191	1.83311e-164	0.388	0.785	1.213
female	S	subarachnoid haemorrhage	0.00348752	8.1171e-09	0.011	0.07	1.213
female	VE	subarachnoid haemorrhage	0.0522241	1.75139e-62	0.167	4.695	1.213
female	Yhomolog	subarachnoid haemorrhage	0.109971	7.48215e-27	0.353	11.59	1.213
female	E	pulmonary embolism +/- dvt	0	0.208755	0	0	1.177
female	Intergenic	pulmonary embolism +/- dvt	0.00992844	5.51774e-37	0.055	0.221	1.177
female	NoCall	pulmonary embolism +/- dvt	0.0038761	2.0359e-06	0.021	0.043	1.177
female	S	pulmonary embolism +/- dvt	0.065806	1.45458e-130	0.362	2.278	1.177
female	VE	pulmonary embolism +/- dvt	0.0700157	1.66232e-78	0.386	10.817	1.177
female	Yhomolog	pulmonary embolism +/- dvt	0.0319143	1.98598e-08	0.176	5.779	1.177
female	E	deep venous thrombosis (dvt)	0.0478833	5.02139e-43	0.101	3.101	1.387
female	Intergenic	deep venous thrombosis (dvt)	0.0516808	2.58161e-148	0.109	0.44	1.387
female	NoCall	deep venous thrombosis (dvt)	0.362677	0	0.764	1.543	1.387
female	S	deep venous thrombosis (dvt)	0.0044391	1.55674e-08	0.009	0.059	1.387
female	VE	deep venous thrombosis (dvt)	0.000983383	0.0465272	0.002	0.058	1.387
female	Yhomolog	deep venous thrombosis (dvt)	0.00723305	0.0167512	0.015	0.501	1.387
female	E	asthma	0.00245884	0.00141374	0.006	0.18	1.325
female	Intergenic	asthma	0.00608077	7.77869e-20	0.014	0.058	1.325
female	NoCall	asthma	0.0645556	1.29299e-70	0.154	0.31	1.325
female	S	asthma	0.00203515	8.79456e-05	0.005	0.03	1.325
female	VE	asthma	0.00560558	1.13157e-06	0.013	0.374	1.325
female	Yhomolog	asthma	0.339726	3.09244e-63	0.808	26.563	1.325
female	E	chronic obstructive airways disease/copd	0.0067808	7.37771e-10	0.006	0.172	1.014
female	Intergenic	chronic obstructive airways disease/copd	0.0154538	6.22291e-64	0.013	0.052	1.014
female	NoCall	chronic obstructive airways disease/copd	0.288233	0	0.238	0.481	1.014
female	S	chronic obstructive airways disease/copd	0	0.113492	0	0	1.014
female	VE	chronic obstructive airways disease/copd	0.0339786	4.80784e-44	0.028	0.787	1.014
female	Yhomolog	chronic obstructive airways disease/copd	0.866482	1.08698e-212	0.716	23.524	1.014
female	E	emphysema/chronic bronchitis	0.00470408	2.82278e-06	0.013	0.395	0.904
female	Intergenic	emphysema/chronic bronchitis	0.0760304	8.47634e-256	0.207	0.839	0.904
female	NoCall	emphysema/chronic bronchitis	0.0345377	3.05741e-43	0.094	0.19	0.904
female	S	emphysema/chronic bronchitis	0.0395249	4.89723e-75	0.108	0.678	0.904
female	VE	emphysema/chronic bronchitis	0.0255329	3.10357e-28	0.07	1.954	0.904
female	Yhomolog	emphysema/chronic bronchitis	0.186128	1.11731e-39	0.508	16.698	0.904
female	E	bronchiectasis	0.0729949	6.80051e-83	0.416	12.798	1.806
female	Intergenic	bronchiectasis	0.0546627	1.10039e-201	0.312	1.26	1.806
female	NoCall	bronchiectasis	0.00223081	0.00024735	0.013	0.026	1.806
female	S	bronchiectasis	0.0344534	1.25446e-71	0.196	1.234	1.806
female	VE	bronchiectasis	0.00204425	0.00111034	0.012	0.327	1.806
female	Yhomolog	bronchiectasis	0.00902263	0.00240017	0.051	1.691	1.806
female	E	other respiratory problems	0.00435336	6.12167e-07	0.026	0.794	1.011
female	Intergenic	other respiratory problems	0.00212484	2.47522e-10	0.013	0.051	1.011
female	NoCall	other respiratory problems	0.0679221	1.40752e-101	0.403	0.814	1.011
female	S	other respiratory problems	0.00305887	1.64342e-08	0.018	0.114	1.011
female	VE	other respiratory problems	0.0480042	8.97617e-63	0.285	7.989	1.011
female	Yhomolog	other respiratory problems	0.0430644	2.22396e-12	0.256	8.401	1.011
female	E	sleep apnoea	0.00236842	0.000354809	0.013	0.387	0.307
female	Intergenic	sleep apnoea	0.0228776	2.4467e-90	0.121	0.491	0.307
female	NoCall	sleep apnoea	0.0152893	6.22501e-23	0.081	0.164	0.307
female	S	sleep apnoea	0.0640547	1.03208e-138	0.34	2.136	0.307
female	VE	sleep apnoea	0.0241591	1.05258e-30	0.128	3.596	0.307
female	Yhomolog	sleep apnoea	0.0596775	1.03312e-15	0.317	10.412	0.307
female	E	pleurisy	0.00585672	3.64861e-08	0.033	1.014	1.174
female	Intergenic	pleurisy	0.00341432	2.22328e-14	0.019	0.078	1.174
female	NoCall	pleurisy	0.0858458	4.66786e-116	0.483	0.976	1.174
female	S	pleurisy	0.00172748	5.36183e-05	0.01	0.061	1.174
female	VE	pleurisy	0.0423322	1.54279e-50	0.238	6.681	1.174
female	Yhomolog	pleurisy	0.0385267	2.60006e-10	0.217	7.128	1.174
female	E	spontaneous pneumothorax/recurrent pneumothorax	0.070117	2.71074e-78	0.451	13.862	0.351
female	Intergenic	spontaneous pneumothorax/recurrent pneumothorax	0.0127485	1.0582e-47	0.082	0.331	0.351
female	NoCall	spontaneous pneumothorax/recurrent pneumothorax	0	0.577596	0	0	0.351
female	S	spontaneous pneumothorax/recurrent pneumothorax	0.00179342	5.18642e-05	0.012	0.072	0.351
female	VE	spontaneous pneumothorax/recurrent pneumothorax	0.0348545	1.34402e-40	0.224	6.284	0.351
female	Yhomolog	spontaneous pneumothorax/recurrent pneumothorax	0.0360461	1.83011e-09	0.232	7.618	0.351
female	E	oesophageal disorder	0.00186363	0.00322134	0.003	0.091	1.031
female	Intergenic	oesophageal disorder	0.0692214	8.32498e-233	0.11	0.445	1.031
female	NoCall	oesophageal disorder	0.130088	2.33061e-157	0.207	0.418	1.031
female	S	oesophageal disorder	0.00152308	0.000322538	0.002	0.015	1.031
female	VE	oesophageal disorder	0.0497119	2.90887e-53	0.079	2.218	1.031
female	Yhomolog	oesophageal disorder	0.376129	3.23131e-78	0.598	19.673	1.031
female	E	stomach disorder	0.00754497	3.89606e-10	0.076	2.337	0.951
female	Intergenic	stomach disorder	0.0168422	1.17698e-64	0.17	0.686	0.951
female	NoCall	stomach disorder	0.00281865	3.23365e-05	0.028	0.057	0.951
female	S	stomach disorder	0.0235798	1.84537e-50	0.237	1.492	0.951
female	VE	stomach disorder	0.00567803	4.18028e-08	0.057	1.604	0.951
female	Yhomolog	stomach disorder	0.0428356	2.50475e-11	0.431	14.182	0.951
female	E	liver/biliary/pancreas problem	0.00270137	0.000454286	0.005	0.165	1.122
female	Intergenic	liver/biliary/pancreas problem	0.235273	0	0.467	1.887	1.122
female	NoCall	liver/biliary/pancreas problem	0.0594084	2.31652e-71	0.118	0.238	1.122
female	S	liver/biliary/pancreas problem	0.00106775	0.00290962	0.002	0.013	1.122
female	VE	liver/biliary/pancreas problem	0.00626655	6.90707e-08	0.012	0.349	1.122
female	Yhomolog	liver/biliary/pancreas problem	0.199308	2.15559e-41	0.395	13	1.122
female	E	other abdominal problem	0.0734132	1.76078e-77	0.176	5.398	1.354
female	Intergenic	other abdominal problem	0.0148587	2.35816e-52	0.036	0.144	1.354
female	NoCall	other abdominal problem	0.113355	1.37574e-139	0.271	0.548	1.354
female	S	other abdominal problem	0.0254135	1.32801e-49	0.061	0.382	1.354
female	VE	other abdominal problem	0	0.941306	0	0	1.354
female	Yhomolog	other abdominal problem	0.191204	2.74156e-41	0.457	15.029	1.354
female	E	gastro-oesophageal reflux (gord) / gastric reflux	0.00765871	3.48146e-11	0.02	0.629	1.06
female	Intergenic	gastro-oesophageal reflux (gord) / gastric reflux	0.131042	0	0.35	1.415	1.06
female	NoCall	gastro-oesophageal reflux (gord) / gastric reflux	0.0745629	1.25024e-111	0.199	0.402	1.06
female	S	gastro-oesophageal reflux (gord) / gastric reflux	0.0138374	2.64035e-33	0.037	0.232	1.06
female	VE	gastro-oesophageal reflux (gord) / gastric reflux	0.033507	1.73066e-44	0.09	2.51	1.06
female	Yhomolog	gastro-oesophageal reflux (gord) / gastric reflux	0.113771	3.11863e-30	0.304	9.991	1.06
female	E	oesophagitis/barretts oesophagus	0.000973029	0.0302492	0.001	0.041	0.755
female	Intergenic	oesophagitis/barretts oesophagus	0.0227534	1.05135e-80	0.031	0.126	0.755
female	NoCall	oesophagitis/barretts oesophagus	0.477435	0	0.654	1.322	0.755
female	S	oesophagitis/barretts oesophagus	0.0993034	8.90952e-192	0.136	0.856	0.755
female	VE	oesophagitis/barretts oesophagus	0.0544456	3.34215e-60	0.075	2.093	0.755
female	Yhomolog	oesophagitis/barretts oesophagus	0.0745773	2.08789e-17	0.102	3.361	0.755
female	E	gastric/stomach ulcers	0.0054649	6.42056e-08	0.063	1.943	0.724
female	Intergenic	gastric/stomach ulcers	0	0.619984	0	0	0.724
female	NoCall	gastric/stomach ulcers	0.00556184	3.09063e-09	0.064	0.13	0.724
female	S	gastric/stomach ulcers	0.0168088	1.55252e-37	0.194	1.221	0.724
female	VE	gastric/stomach ulcers	0.00525591	8.55084e-08	0.061	1.704	0.724
female	Yhomolog	gastric/stomach ulcers	0.0534119	3.90542e-14	0.617	20.299	0.724
female	E	gastritis/gastric erosions	0.00493067	2.69147e-07	0.008	0.242	1.297
female	Intergenic	gastritis/gastric erosions	0.00961693	6.66908e-39	0.015	0.062	1.297
female	NoCall	gastritis/gastric erosions	0.0859388	2.53775e-120	0.137	0.277	1.297
female	S	gastritis/gastric erosions	0	0.838239	0	0	1.297
female	VE	gastritis/gastric erosions	0.0298874	1.8917e-37	0.048	1.335	1.297
female	Yhomolog	gastritis/gastric erosions	0.497318	3.81494e-118	0.792	26.047	1.297
female	E	irritable bowel syndrome	0.127947	5.3042e-158	0.315	9.689	2.725
female	Intergenic	irritable bowel syndrome	0.011371	1.08087e-47	0.028	0.113	2.725
female	NoCall	irritable bowel syndrome	0.00727309	3.85774e-12	0.018	0.036	2.725
female	S	irritable bowel syndrome	0	0.146637	0	0	2.725
female	VE	irritable bowel syndrome	0.025097	4.23492e-33	0.062	1.733	2.725
female	Yhomolog	irritable bowel syndrome	0.234442	3.08797e-59	0.577	18.978	2.725
female	E	hepatitis	0.00173606	0.00496188	0.012	0.375	0.882
female	Intergenic	hepatitis	0.0058562	7.14576e-21	0.041	0.166	0.882
female	NoCall	hepatitis	0	0.093371	0	0	0.882
female	S	hepatitis	0	0.0732888	0	0	0.882
female	VE	hepatitis	0.0581572	1.3931e-60	0.408	11.446	0.882
female	Yhomolog	hepatitis	0.0767514	6.30267e-17	0.539	17.707	0.882
female	E	infective/viral hepatitis	0.246556	2.83754e-226	0.172	5.29	0.855
female	Intergenic	infective/viral hepatitis	0.149835	0	0.105	0.423	0.855
female	NoCall	infective/viral hepatitis	0.0675106	1.41899e-74	0.047	0.095	0.855
female	S	infective/viral hepatitis	0.952458	0	0.664	4.176	0.855
female	VE	infective/viral hepatitis	0.0100044	6.19437e-11	0.007	0.196	0.855
female	Yhomolog	infective/viral hepatitis	0.0070743	0.0148279	0.005	0.162	0.855
female	E	non-infective hepatitis	0.0192571	3.33789e-21	0.03	0.929	1.23
female	Intergenic	non-infective hepatitis	0.00221695	5.71156e-09	0.003	0.014	1.23
female	NoCall	non-infective hepatitis	0.436251	0	0.684	1.383	1.23
female	S	non-infective hepatitis	0.158925	9.96866e-294	0.249	1.567	1.23
female	VE	non-infective hepatitis	0.0207191	4.10678e-23	0.033	0.912	1.23
female	Yhomolog	non-infective hepatitis	0	0.907693	0	0	1.23
female	E	liver failure/cirrhosis	0.0633306	5.95078e-56	0.043	1.329	0.922
female	Intergenic	liver failure/cirrhosis	0.31271	0	0.213	0.863	0.922
female	NoCall	liver failure/cirrhosis	0.0377953	5.94108e-40	0.026	0.052	0.922
female	S	liver failure/cirrhosis	0.366361	0	0.25	1.571	0.922
female	VE	liver failure/cirrhosis	0.4761	0	0.325	9.114	0.922
female	Yhomolog	liver failure/cirrhosis	0.208811	1.50067e-37	0.143	4.686	0.922
female	E	gall bladder disease	0.0393756	1.27213e-40	0.018	0.55	2.129
female	Intergenic	gall bladder disease	0.00122987	1.8337e-05	0.001	0.002	2.129
female	NoCall	gall bladder disease	0.054584	2.45182e-65	0.025	0.05	2.129
female	S	gall bladder disease	0.217703	0	0.099	0.621	2.129
female	VE	gall bladder disease	1.78356	0	0.81	22.723	2.129
female	Yhomolog	gall bladder disease	0.105009	1.78614e-22	0.048	1.568	2.129
female	E	cholelithiasis/gall stones	0.134331	1.51388e-169	0.28	8.617	3.314
female	Intergenic	cholelithiasis/gall stones	0.0143911	3.24123e-61	0.03	0.121	3.314
female	NoCall	cholelithiasis/gall stones	0.0552873	1.86134e-83	0.115	0.233	3.314
female	S	cholelithiasis/gall stones	0.0438077	1.04503e-101	0.091	0.574	3.314
female	VE	cholelithiasis/gall stones	0.0109849	1.04902e-15	0.023	0.643	3.314
female	Yhomolog	cholelithiasis/gall stones	0.220639	4.19032e-57	0.46	15.129	3.314
female	E	cholecystitis	0.0434852	3.39307e-52	0.11	3.368	2.611
female	Intergenic	cholecystitis	0.00123988	3.10946e-06	0.003	0.013	2.611
female	NoCall	cholecystitis	0.279735	0	0.705	1.423	2.611
female	S	cholecystitis	0.0481401	1.88145e-103	0.121	0.762	2.611
female	VE	cholecystitis	0.0244589	1.09277e-30	0.062	1.728	2.611
female	Yhomolog	cholecystitis	0	0.421445	0	0	2.611
female	E	pancreatitis	0	0.718528	0	0	0.948
female	Intergenic	pancreatitis	0.00448328	2.95458e-19	0.007	0.03	0.948
female	NoCall	pancreatitis	0.393369	0	0.652	1.317	0.948
female	S	pancreatitis	0.0073775	1.16676e-17	0.012	0.077	0.948
female	VE	pancreatitis	0.0547398	5.24468e-68	0.091	2.544	0.948
female	Yhomolog	pancreatitis	0.143559	6.91344e-36	0.238	7.82	0.948
female	E	peritonitis	0.0458248	3.38125e-58	0.098	3.003	1.03
female	Intergenic	peritonitis	0.0187969	4.34904e-78	0.04	0.162	1.03
female	NoCall	peritonitis	0.0613935	5.96633e-91	0.131	0.264	1.03
female	S	peritonitis	0.0886811	2.57028e-200	0.189	1.188	1.03
female	VE	peritonitis	0.161871	1.94156e-204	0.345	9.675	1.03
female	Yhomolog	peritonitis	0.0926593	1.37172e-24	0.197	6.492	1.03
female	E	renal failure not requiring dialysis	0.0626995	6.44987e-72	0.261	8.015	0.88
female	Intergenic	renal failure not requiring dialysis	0.0175812	1.14397e-66	0.073	0.295	0.88
female	NoCall	renal failure not requiring dialysis	0.0284758	2.10243e-39	0.118	0.239	0.88
female	S	renal failure not requiring dialysis	0.00148864	0.000189299	0.006	0.039	0.88
female	VE	renal failure not requiring dialysis	0.0481013	1.10449e-56	0.2	5.608	0.88
female	Yhomolog	renal failure not requiring dialysis	0.0822301	3.82523e-20	0.342	11.237	0.88
female	E	urinary tract infection/kidney infection	0.0470397	1.96154e-58	0.235	7.213	2.177
female	Intergenic	urinary tract infection/kidney infection	0.000996883	2.02416e-05	0.005	0.02	2.177
female	NoCall	urinary tract infection/kidney infection	0.0130162	3.16715e-20	0.065	0.131	2.177
female	S	urinary tract infection/kidney infection	0.00771886	1.16417e-18	0.038	0.242	2.177
female	VE	urinary tract infection/kidney infection	0.112603	7.52877e-140	0.561	15.747	2.177
female	Yhomolog	urinary tract infection/kidney infection	0.0191772	4.10452e-06	0.096	3.144	2.177
female	E	kidney stone/ureter stone/bladder stone	0.266295	0	0.44	13.544	0.417
female	Intergenic	kidney stone/ureter stone/bladder stone	0.0520512	5.0414e-221	0.086	0.348	0.417
female	NoCall	kidney stone/ureter stone/bladder stone	0.112933	3.68206e-172	0.187	0.377	0.417
female	S	kidney stone/ureter stone/bladder stone	0.0770341	2.77614e-181	0.127	0.801	0.417
female	VE	kidney stone/ureter stone/bladder stone	0	0.119561	0	0	0.417
female	Yhomolog	kidney stone/ureter stone/bladder stone	0.0963303	1.82621e-26	0.159	5.238	0.417
female	E	bladder problem (not cancer)	0.0212785	8.75609e-28	0.048	1.486	1.967
female	Intergenic	bladder problem (not cancer)	0.0501531	1.50871e-203	0.114	0.46	1.967
female	NoCall	bladder problem (not cancer)	0.00152001	0.00150825	0.003	0.007	1.967
female	S	bladder problem (not cancer)	0.00446159	1.41384e-11	0.01	0.064	1.967
female	VE	bladder problem (not cancer)	0.179403	7.23024e-225	0.407	11.423	1.967
female	Yhomolog	bladder problem (not cancer)	0.183653	8.9096e-47	0.417	13.708	1.967
female	E	urinary frequency / incontinence	0.00388404	7.85818e-06	0.008	0.234	1.504
female	Intergenic	urinary frequency / incontinence	0.0462692	1.76523e-172	0.091	0.366	1.504
female	NoCall	urinary frequency / incontinence	0.106065	6.60894e-142	0.208	0.42	1.504
female	S	urinary frequency / incontinence	0.337183	0	0.66	4.151	1.504
female	VE	urinary frequency / incontinence	0.00397934	4.91087e-06	0.008	0.219	1.504
female	Yhomolog	urinary frequency / incontinence	0.0131339	0.000235332	0.026	0.846	1.504
female	E	diabetes	0.00808904	5.65732e-09	0.014	0.427	0.578
female	Intergenic	diabetes	0.0596784	1.85827e-181	0.102	0.414	0.578
female	NoCall	diabetes	0.120563	8.19214e-132	0.207	0.418	0.578
female	S	diabetes	0.0833693	1.17707e-140	0.143	0.899	0.578
female	VE	diabetes	0.177685	3.13553e-167	0.305	8.549	0.578
female	Yhomolog	diabetes	0.133521	3.21076e-26	0.229	7.531	0.578
female	E	gestational diabetes	0.0287401	2.74182e-32	0.087	2.67	5.353
female	Intergenic	gestational diabetes	0.00148201	1.06281e-06	0.004	0.018	5.353
female	NoCall	gestational diabetes	0.180515	2.49579e-227	0.545	1.102	5.353
female	S	gestational diabetes	0.081429	3.9982e-159	0.246	1.546	5.353
female	VE	gestational diabetes	0.0132044	5.54979e-16	0.04	1.119	5.353
female	Yhomolog	gestational diabetes	0.0256872	5.57374e-07	0.078	2.551	5.353
female	E	type 1 diabetes	0.00870563	3.92745e-11	0.058	1.789	0.994
female	Intergenic	type 1 diabetes	0.0136514	5.08062e-51	0.091	0.369	0.994
female	NoCall	type 1 diabetes	0.0977997	8.26497e-128	0.654	1.32	0.994
female	S	type 1 diabetes	0.00729129	3.20199e-16	0.049	0.306	0.994
female	VE	type 1 diabetes	0.0147817	3.48328e-18	0.099	2.77	0.994
female	Yhomolog	type 1 diabetes	0.00741285	0.00636439	0.05	1.629	0.994
female	E	type 2 diabetes	0.00586393	6.30107e-08	0.08	2.453	0.616
female	Intergenic	type 2 diabetes	0.000709083	0.00063306	0.01	0.039	0.616
female	NoCall	type 2 diabetes	0.0588771	2.13223e-77	0.801	1.618	0.616
female	S	type 2 diabetes	0	0.0715558	0	0	0.616
female	VE	type 2 diabetes	0.00416083	4.17243e-06	0.057	1.588	0.616
female	Yhomolog	type 2 diabetes	0.00389173	0.0485628	0.053	1.741	0.616
female	E	thyroid problem (not cancer)	0.00934202	6.16013e-12	0.034	1.056	5.105
female	Intergenic	thyroid problem (not cancer)	0.155452	0	0.572	2.311	5.105
female	NoCall	thyroid problem (not cancer)	0.00689243	1.38542e-10	0.025	0.051	5.105
female	S	thyroid problem (not cancer)	0.0315014	3.60697e-65	0.116	0.728	5.105
female	VE	thyroid problem (not cancer)	0.00356276	1.79788e-05	0.013	0.367	5.105
female	Yhomolog	thyroid problem (not cancer)	0.0652048	4.31881e-16	0.24	7.882	5.105
female	E	hyperthyroidism/thyrotoxicosis	0.0161149	8.43237e-20	0.046	1.42	4.173
female	Intergenic	hyperthyroidism/thyrotoxicosis	0.0213366	9.70964e-81	0.061	0.247	4.173
female	NoCall	hyperthyroidism/thyrotoxicosis	0.0945939	6.2924e-127	0.271	0.548	4.173
female	S	hyperthyroidism/thyrotoxicosis	0.142582	2.09538e-292	0.409	2.568	4.173
female	VE	hyperthyroidism/thyrotoxicosis	0.0292733	2.7315e-35	0.084	2.353	4.173
female	Yhomolog	hyperthyroidism/thyrotoxicosis	0.0450778	9.30017e-12	0.129	4.247	4.173
female	E	hypothyroidism/myxoedema	0.593304	0	0.195	6.007	5.356
female	Intergenic	hypothyroidism/myxoedema	0.00536884	1.87418e-14	0.002	0.007	5.356
female	NoCall	hypothyroidism/myxoedema	0.0105938	1.2234e-10	0.003	0.007	5.356
female	S	hypothyroidism/myxoedema	0.446897	0	0.147	0.925	5.356
female	VE	hypothyroidism/myxoedema	1.85792	0	0.612	17.156	5.356
female	Yhomolog	hypothyroidism/myxoedema	0.123284	1.52885e-19	0.041	1.334	5.356
female	E	pituitary adenoma/tumour	0.109535	1.00778e-119	0.421	12.942	1.547
female	Intergenic	pituitary adenoma/tumour	0.00820602	5.84936e-31	0.032	0.127	1.547
female	NoCall	pituitary adenoma/tumour	0.00356468	5.05582e-06	0.014	0.028	1.547
female	S	pituitary adenoma/tumour	0.00305325	1.53731e-07	0.012	0.074	1.547
female	VE	pituitary adenoma/tumour	0.00123943	0.0123988	0.005	0.134	1.547
female	Yhomolog	pituitary adenoma/tumour	0.134683	7.46789e-31	0.517	17.012	1.547
female	E	eye/eyelid problem	0.0053959	5.08029e-07	0.01	0.302	1.266
[truncated: 2,429 more rows]

## Sheet: Legend
Table S6 - Heritability estimates, enrichment and sex ratio for self-reported phenotypes in UK Biobank
Column title	Description
GWAS sex	UK Biobank GWAS in male samples only, female samples only or all samples pooled.
XCI state	XCI state
Trait	GWAS phenotype
Heritability	Trait heritability
LDSC pvalue	LD Score regression pvalue
H2 prop	Proportion of heritability explained by corresponding XCI state
Enrichment	Heritability enrichment for corresponding XCI state
F/M ratio	Ratio of female cases over male cases used to determine sex bias in traits
